# Supplementary material for: Spatial and temporal distribution dataset of benthic macroalgae during the 2015-2016 tropical monsoonal cycle in Malaysia
Source: Biodivers Data J. 2022 Jul 26;10:e85676. doi: 10.3897/BDJ.10.e85676 (PMC9848546; doi:10.3897/BDJ.10.e85676)
Supplement: Supplementary material 1 — Percent cover and frequency of macroalgae along the eastern coast of Johor [file bdj-10-e85676-s001.csv]

Location	Sampling period	Species	1-5 m (%C)	1-5 m (%F)	6-10 m (%C)	6-10 m (%F)	11-15 m (%C)	11-15 m (%F)	16-20 m (%C)	16-20 m (%F)	21-25 m (%C)	21-25 m (%F)
Telok Gorek	Jan-15	Chaetomorpha spp.	1.92	5.33	0.72	5.78	2.81	7.33	3.03	4.89	1.08	5.33
Telok Gorek	Jan-15	Cladophoropsis membranacea	NF	NF	9.31	16	28.99	47.78	20.11	38.67	NF	NF
Telok Gorek	Feb-15	Chaetomorpha spp.	1.92	5.33	1.68	6.22	3.04	8.89	3.6	6.22	1.81	6.67
Telok Gorek	Feb-15	Cladophoropsis membranacea	NF	NF	10.99	18.22	28.05	44.44	20.77	42.22	NF	NF
Telok Gorek	Feb-15	Canistrocarpus cervicornis	NF	NF	0.42	1.33	1.32	2.67	1.21	2.67	NF	NF
Telok Gorek	Mar-15	Chaetomorpha spp.	1.99	5.33	2.1	5.78	2.6	8.44	3.13	6.22	1.4	4.89
Telok Gorek	Mar-15	Cladophoropsis membranacea	NF	NF	10.71	18.22	27.11	44	20.79	42.22	NF	NF
Telok Gorek	Mar-15	Canistrocarpus cervicornis	NF	NF	0.96	2.67	3.18	5.78	1.61	2.67	NF	NF
Telok Gorek	Apr-15	Chaetomorpha spp.	1.99	5.33	2.1	5.78	0.96	4.89	3.54	7.56	1.79	6.22
Telok Gorek	Apr-15	Cladophoropsis membranacea	NF	NF	10.71	18.22	27.11	44	20.79	42.22	NF	NF
Telok Gorek	Apr-15	Canistrocarpus cervicornis	NF	NF	0.96	2.67	3.18	5.78	0.75	1.33	NF	NF
Telok Gorek	Apr-15	Padina australis	NF	NF	1.13	3.11	1.03	2.67	NF	NF	NF	NF
Telok Gorek	Apr-15	Sargassum polycystum	NF	NF	NF	NF	1.94	4.89	1.94	4.89	0.64	1.78
Telok Gorek	May-15	Chaetomorpha spp.	1.83	5.33	2.44	6.67	2.53	8	3.72	8.44	1.35	4.89
Telok Gorek	May-15	Cladophoropsis membranacea	NF	NF	10.79	18.22	27.22	44	21.47	42.22	NF	NF
Telok Gorek	May-15	Canistrocarpus cervicornis	NF	NF	0.86	2.67	2.86	5.78	1.33	2.67	NF	NF
Telok Gorek	May-15	Padina australis	NF	NF	1.54	3.56	0.6	1.33	NF	NF	NF	NF
Telok Gorek	May-15	Jania adherens	NF	NF	0.42	0.89	0.97	1.33	NF	NF	NF	NF
Telok Gorek	May-15	Padina boergesenii	NF	NF	NF	NF	0.26	0.89	NF	NF	NF	NF
Telok Gorek	May-15	Sargassum polycystum	NF	NF	NF	NF	0.83	1.33	0.92	1.78	1.38	3.11
Telok Gorek	Jun-15	Chaetomorpha spp.	1.83	5.33	2.06	4.44	2.53	8	3.65	8.44	0.9	4.44
Telok Gorek	Jun-15	Cladophoropsis membranacea	NF	NF	10.74	18.22	28.11	44	22.04	42.67	NF	NF
Telok Gorek	Jun-15	Canistrocarpus cervicornis	NF	NF	0.57	2.67	1.72	5.78	0.67	2.67	NF	NF
Telok Gorek	Jun-15	Padina australis	NF	NF	1.13	2.67	0.6	1.33	NF	NF	NF	NF
Telok Gorek	Jun-15	Jania adherens	NF	NF	0.28	0.44	0.42	1.33	NF	NF	NF	NF
Telok Gorek	Jun-15	Padina boergesenii	NF	NF	NF	NF	0.31	0.89	NF	NF	NF	NF
Telok Gorek	Jun-15	Sargassum polycystum	NF	NF	NF	NF	1.04	1.33	1.42	2.67	2.31	5.78
Telok Gorek	Jun-15	Sargassum paniculatum	NF	NF	NF	NF	NF	NF	NF	NF	0.28	0.44
Telok Gorek	Jul-15	Chaetomorpha spp.	1.83	5.33	1.77	5.33	2.4	6.67	3.28	7.11	NF	NF
Telok Gorek	Jul-15	Cladophoropsis membranacea	NF	NF	10.69	18.22	28.04	57.33	22.79	42.67	NF	NF
Telok Gorek	Jul-15	Padina australis	NF	NF	NF	NF	1.13	2.67	NF	NF	NF	NF
Telok Gorek	Jul-15	Sargassum polycystum	NF	NF	0.6	1.33	3.26	6.67	2.03	3.56	2.31	5.78
Telok Gorek	Jul-15	Sargassum paniculatum	NF	NF	NF	NF	NF	NF	NF	NF	0.6	1.33
Telok Gorek	Jul-15	Dictyota mertensii	NF	NF	NF	NF	0.31	1.33	NF	NF	0.28	0.89
Telok Gorek	Aug-15	Chaetomorpha spp.	1.42	4.44	0.95	3.11	2.33	6.67	2.39	3.56	NF	NF
Telok Gorek	Aug-15	Cladophoropsis membranacea	NF	NF	10.64	18.22	27.42	57.33	21.1	40.89	NF	NF
Telok Gorek	Aug-15	Sargassum polycystum	NF	NF	0.6	1.33	0.62	1.78	1.32	3.11	0.9	2.22
Telok Gorek	Aug-15	Sargassum paniculatum	NF	NF	NF	NF	NF	NF	NF	NF	0.5	0.89
Telok Gorek	Sep-15	Chaetomorpha spp.	0.67	1.78	0.49	1.33	1.92	4.44	1.93	3.56	NF	NF
Telok Gorek	Sep-15	Cladophoropsis membranacea	NF	NF	6.79	11.11	14.94	35.56	9.57	15.11	NF	NF
Telok Gorek	Sep-15	Sargassum polycystum	NF	NF	0.31	0.44	0.86	2.22	NF	NF	NF	NF
Telok Gorek	Sep-15	Sargassum paniculatum	NF	NF	NF	NF	NF	NF	NF	NF	0.49	0.89
Telok Gorek	Jan-16	Chaetomorpha spp.	1.63	4.89	1.76	4.89	3.33	10.22	3.56	6.22	2.25	6.67
Telok Gorek	Feb-16	Chaetomorpha spp.	2.23	4.89	2.28	4.89	4.39	10.22	1.26	1.78	NF	NF
Pantai Pasir Lanun	Jan-15	Chaetomorpha spp.	1.42	3.11	2.05	5.78	2.2	6.22	NF	NF	NF	NF
Pantai Pasir Lanun	Jan-15	Gracilaria salicornia	0.75	1.78	3.27	7.11	3.63	7.56	NF	NF	NF	NF
Pantai Pasir Lanun	Jan-15	Pterocladiella caloglossoides	NF	NF	2.28	2.67	2.28	4.89	NF	NF	NF	NF
Pantai Pasir Lanun	Jan-15	Ceratodictyon intricatum	NF	NF	9.35	24	10.85	23.56	6.19	12.44	NF	NF
Pantai Pasir Lanun	Feb-15	Chaetomorpha spp.	0.83	1.78	2.16	6.22	2.81	8	NF	NF	NF	NF
Pantai Pasir Lanun	Feb-15	Gracilaria salicornia	1.49	3.11	4.55	10.22	3.76	7.56	NF	NF	NF	NF
Pantai Pasir Lanun	Feb-15	Pterocladiella caloglossoides	NF	NF	1.99	5.33	2.07	4.89	NF	NF	NF	NF
Pantai Pasir Lanun	Feb-15	Ceratodictyon intricatum	NF	NF	3.49	9.33	10.08	20.44	6.01	12	NF	NF
Pantai Pasir Lanun	Feb-15	Sargassum polycystum	NF	NF	6.06	16	NF	NF	NF	NF	NF	NF
Pantai Pasir Lanun	Feb-15	Sargassum paniculatum	NF	NF	2.89	7.56	NF	NF	NF	NF	NF	NF
Pantai Pasir Lanun	Mar-15	Chaetomorpha spp.	1.49	3.11	2.16	6.22	2.81	8	NF	NF	NF	NF
Pantai Pasir Lanun	Mar-15	Gracilaria salicornia	0.42	1.78	3.9	9.78	2.91	7.56	NF	NF	NF	NF
Pantai Pasir Lanun	Mar-15	Pterocladiella caloglossoides	NF	NF	1.99	5.33	2.07	4.89	NF	NF	NF	NF
Pantai Pasir Lanun	Mar-15	Ceratodictyon intricatum	NF	NF	3.49	9.33	10.78	22.22	6.01	12	NF	NF
Pantai Pasir Lanun	Mar-15	Sargassum polycystum	NF	NF	6.06	16	NF	NF	NF	NF	NF	NF
Pantai Pasir Lanun	Mar-15	Sargassum paniculatum	NF	NF	2.89	7.56	NF	NF	NF	NF	NF	NF
Pantai Pasir Lanun	Apr-15	Chaetomorpha spp.	1.39	3.11	2.56	6.22	2.78	8	NF	NF	NF	NF
Pantai Pasir Lanun	Apr-15	Pterocladiella caloglossoides	NF	NF	1.96	5.33	1.97	4.89	NF	NF	NF	NF
Pantai Pasir Lanun	Apr-15	Ceratodictyon intricatum	NF	NF	3.64	9.33	10.12	20.89	5.2	12	NF	NF
Pantai Pasir Lanun	Apr-15	Sargassum polycystum	NF	NF	6.92	17.33	0.68	1.78	NF	NF	NF	NF
Pantai Pasir Lanun	Apr-15	Sargassum paniculatum	NF	NF	2.33	4.89	NF	NF	NF	NF	NF	NF
Pantai Pasir Lanun	May-15	Chaetomorpha spp.	1.04	3.11	2.02	5.33	0.49	2.22	NF	NF	NF	NF
Pantai Pasir Lanun	May-15	Pterocladiella caloglossoides	NF	NF	0.42	2.22	NF	NF	NF	NF	NF	NF
Pantai Pasir Lanun	May-15	Ceratodictyon intricatum	NF	NF	1.25	3.56	6.52	13.78	4.28	9.78	NF	NF
Pantai Pasir Lanun	May-15	Sargassum polycystum	0.82	1.78	10.05	20	1.72	1.78	NF	NF	NF	NF
Pantai Pasir Lanun	May-15	Sargassum paniculatum	NF	NF	4.88	12.44	NF	NF	NF	NF	NF	NF
Pantai Pasir Lanun	Jun-15	Chaetomorpha spp.	NF	NF	0.5	1.33	0.72	2.67	NF	NF	NF	NF
Pantai Pasir Lanun	Jun-15	Pterocladiella caloglossoides	NF	NF	0.64	1.78	NF	NF	NF	NF	NF	NF
Pantai Pasir Lanun	Jun-15	Ceratodictyon intricatum	NF	NF	1.08	2.22	0.38	1.33	2.36	6.22	NF	NF
Pantai Pasir Lanun	Jun-15	Sargassum polycystum	NF	NF	8.71	20.44	1.58	2.67	NF	NF	NF	NF
Pantai Pasir Lanun	Jun-15	Sargassum paniculatum	NF	NF	3.95	12	NF	NF	NF	NF	NF	NF
Pantai Pasir Lanun	Jul-15	Sargassum polycystum	NF	NF	7.56	18.22	4.17	8.44	NF	NF	NF	NF
Pantai Pasir Lanun	Jul-15	Sargassum paniculatum	NF	NF	6.95	15.56	0.31	0.89	NF	NF	NF	NF
Pantai Pasir Lanun	Aug-15	Sargassum polycystum	NF	NF	7.21	16.89	3.83	7.56	NF	NF	NF	NF
Pantai Pasir Lanun	Aug-15	Sargassum paniculatum	NF	NF	7.03	14.67	0.75	1.78	NF	NF	NF	NF
Pantai Pasir Lanun	Aug-15	Padina australis	NF	NF	0.67	2.67	NF	NF	NF	NF	NF	NF
Pantai Pasir Lanun	Aug-15	Padina minor	0.38	1.33	0.83	3.11	NF	NF	NF	NF	NF	NF
Pantai Pasir Lanun	Sep-15	Sargassum polycystum	NF	NF	6.72	16.44	4.43	7.11	NF	NF	NF	NF
Pantai Pasir Lanun	Sep-15	Sargassum paniculatum	NF	NF	6.92	14.22	NF	NF	NF	NF	NF	NF
Pantai Pasir Lanun	Sep-15	Padina australis	0.64	1.33	2.8	7.11	NF	NF	NF	NF	NF	NF
Pantai Pasir Lanun	Sep-15	Padina minor	0.31	0.89	2.18	5.33	NF	NF	NF	NF	NF	NF
Pulau Mawar	Jan-15	Cladophoropsis membranacea	NF	NF	NF	NF	4.29	7.11	15.54	29.33	11.13	19.11
Pulau Mawar	Feb-15	Cladophoropsis membranacea	NF	NF	NF	NF	8.26	13.33	25.08	44.44	16.82	27.56
Pulau Mawar	Feb-15	Ceratodictyon intricatum	NF	NF	7.95	14.67	22.67	40.44	13.98	24	NF	NF
Pulau Mawar	Feb-15	Padina minor	NF	NF	0.38	1.33	1.25	4	0.64	1.78	NF	NF
Pulau Mawar	Mar-15	Cladophoropsis membranacea	NF	NF	NF	NF	4.33	7.11	26.97	46.67	16.89	29.33
Pulau Mawar	Mar-15	Ceratodictyon intricatum	NF	NF	7.78	14.67	21.1	36.89	14.31	24	NF	NF
Pulau Mawar	Mar-15	Padina minor	NF	NF	0.82	2.22	3.21	7.56	1.08	1.78	NF	NF
Pulau Mawar	Apr-15	Cladophoropsis membranacea	NF	NF	NF	NF	4.29	7.11	24.89	43.11	17.11	28
Pulau Mawar	Apr-15	Ceratodictyon intricatum	NF	NF	8.83	16.44	20.07	34.22	10.58	16.44	NF	NF
Pulau Mawar	Apr-15	Padina minor	NF	NF	1.79	3.11	5.75	8.89	2.8	4.89	NF	NF
Pulau Mawar	May-15	Cladophoropsis membranacea	NF	NF	NF	NF	3.93	7.11	26.54	42.67	20.69	33.78
Pulau Mawar	May-15	Ceratodictyon intricatum	NF	NF	2.58	5.33	5.18	8.89	6.9	11.56	NF	NF
Pulau Mawar	May-15	Padina minor	NF	NF	2.87	4.89	7.1	13.33	2.07	3.11	NF	NF
Pulau Mawar	May-15	Sargassum polycystum	NF	NF	1.38	3.56	5.32	12.89	0.38	1.33	NF	NF
Pulau Mawar	May-15	Sargassum paniculatum	NF	NF	NF	NF	1.72	3.56	NF	NF	NF	NF
Pulau Mawar	Jun-15	Cladophoropsis membranacea	NF	NF	NF	NF	4.29	7.11	28.31	43.11	23.96	38.67
Pulau Mawar	Jun-15	Ceratodictyon intricatum	NF	NF	NF	NF	3.25	6.67	NF	NF	NF	NF
Pulau Mawar	Jun-15	Padina minor	NF	NF	3.12	5.33	9.14	16	6.07	10.67	NF	NF
Pulau Mawar	Jun-15	Sargassum polycystum	NF	NF	3.12	5.33	6.19	12	2.07	4.44	NF	NF
Pulau Mawar	Jun-15	Sargassum paniculatum	NF	NF	NF	NF	2.83	5.33	3.57	6.22	NF	NF
Pulau Mawar	Jul-15	Cladophoropsis membranacea	NF	NF	NF	NF	NF	NF	21.67	36.44	13.5	24.44
Pulau Mawar	Jul-15	Padina minor	NF	NF	4.43	8	15.83	30.22	7.62	13.33	NF	NF
Pulau Mawar	Jul-15	Sargassum polycystum	NF	NF	4.72	9.33	6.87	12.89	3.58	7.56	NF	NF
Pulau Mawar	Jul-15	Sargassum paniculatum	NF	NF	0.83	1.78	5.29	10.22	4.19	6.22	NF	NF
Pulau Mawar	Aug-15	Cladophoropsis membranacea	NF	NF	NF	NF	NF	NF	4.5	9.78	3.31	7.11
Pulau Mawar	Jan-16	Cladophoropsis membranacea	NF	NF	NF	NF	NF	NF	0.79	4.22	NF	NF
Pulau Mawar	Feb-16	Cladophoropsis membranacea	NF	NF	NF	NF	NF	NF	4.76	11.11	3.38	7.56
Tanjung Lompat	Jan-15	Chaetomorpha spp.	3.73	9.33	NF	NF	0.97	3.56	0.38	1.33	0.75	1.78
Tanjung Lompat	Jan-15	Ulva intestinalis	2.28	5.33	2.31	6.22	3.9	8.44	0.49	1.33	0.31	0.44
Tanjung Lompat	Jan-15	Cladophora vagabunda	1.48	4.44	1.12	2.67	NF	NF	NF	NF	NF	NF
Tanjung Lompat	Jan-15	Acanthophora spicifera	0.6	1.78	1.67	3.11	NF	NF	NF	NF	NF	NF
Tanjung Lompat	Jan-15	Hypnea spinella	0.74	1.33	NF	NF	NF	NF	NF	NF	NF	NF
Tanjung Lompat	Feb-15	Chaetomorpha spp.	3.75	9.78	NF	NF	1.29	4	0.38	1.33	0.83	1.78
Tanjung Lompat	Feb-15	Ulva intestinalis	1.61	5.33	2.17	6.67	4.76	9.78	0.5	1.33	0.38	1.33
Tanjung Lompat	Feb-15	Padina minor	NF	NF	0.71	1.78	NF	NF	NF	NF	NF	NF
Tanjung Lompat	Feb-15	Sargassum oligocystum	0.49	1.33	1.13	2.67	NF	NF	NF	NF	NF	NF
Tanjung Lompat	Feb-15	Acetabularia acetabulum	NF	NF	1.79	4.44	NF	NF	NF	NF	NF	NF
Tanjung Lompat	Feb-15	Cladophora vagabunda	1.39	4	1.55	3.11	NF	NF	NF	NF	NF	NF
Tanjung Lompat	Feb-15	Acanthophora spicifera	0.71	1.78	1.22	2.67	NF	NF	NF	NF	NF	NF
Tanjung Lompat	Feb-15	Hypnea spinella	NF	NF	0.53	1.33	0.42	1.33	NF	NF	NF	NF
Tanjung Lompat	Feb-15	Amphiroa fragilissima	0.49	1.33	0.53	1.33	0.31	1.33	NF	NF	NF	NF
Tanjung Lompat	Feb-15	Chondrus crispus	0.31	0.89	NF	NF	NF	NF	NF	NF	NF	NF
Tanjung Lompat	Feb-15	Gracilaria coronopifolia	0.97	2.67	1.19	3.11	0.31	1.33	NF	NF	NF	NF
Tanjung Lompat	Feb-15	Cladophora stimpsonii	NF	NF	0.31	1.33	NF	NF	NF	NF	NF	NF
Tanjung Lompat	Feb-15	Gracilaria arcuata	NF	NF	0.42	0.89	NF	NF	NF	NF	NF	NF
Tanjung Lompat	Feb-15	Valonia aegagropila	NF	NF	NF	NF	0.5	1.78	NF	NF	NF	NF
Tanjung Lompat	Mar-15	Chaetomorpha spp.	5.95	15.11	0.31	1.33	1.25	4	0.58	2.67	0.71	1.78
Tanjung Lompat	Mar-15	Ulva intestinalis	2.11	6.67	3.61	9.78	3.6	6.67	0.38	1.33	NF	NF
Tanjung Lompat	Mar-15	Sargassum oligocystum	0.62	1.78	0.83	1.78	0.71	1.78	2.75	4.89	NF	NF
Tanjung Lompat	Mar-15	Sargassum paniculatum	NF	NF	1.74	3.11	NF	NF	2.67	5.78	NF	NF
Tanjung Lompat	Mar-15	Acanthophora spicifera	0.86	1.78	1.1	3.11	0.5	1.33	NF	NF	NF	NF
Tanjung Lompat	Mar-15	Chondrus crispus	0.49	1.33	NF	NF	NF	NF	NF	NF	NF	NF
Tanjung Lompat	Mar-15	Gracilaria coronopifolia	0.82	2.67	1.53	3.11	0.49	1.33	NF	NF	NF	NF
Tanjung Lompat	Mar-15	Gracilaria arcuata	NF	NF	1.61	3.56	NF	NF	NF	NF	NF	NF
Tanjung Lompat	Mar-15	Crassiphycus changii	NF	NF	NF	NF	0.51	1.33	NF	NF	NF	NF
Tanjung Lompat	Apr-15	Chaetomorpha spp.	6.54	16.44	NF	NF	1.01	2.67	NF	NF	0.83	1.78
Tanjung Lompat	Apr-15	Ulva intestinalis	1.24	3.11	2.74	6.22	3.49	8.89	NF	NF	NF	NF
Tanjung Lompat	Apr-15	Ceratodictyon intricatum	1.96	4.89	NF	NF	NF	NF	0.49	1.33	NF	NF
Tanjung Lompat	Apr-15	Dictyota mertensii	NF	NF	0.38	0.89	0.38	1.33	3.18	5.33	NF	NF
Tanjung Lompat	Apr-15	Caulerpa racemosa	NF	NF	NF	NF	NF	NF	2.99	5.78	NF	NF
Tanjung Lompat	Apr-15	Padina minor	1.28	3.11	2.78	5.33	2.07	4.89	0.49	1.33	NF	NF
Tanjung Lompat	Apr-15	Sargassum oligocystum	0.62	1.78	0.92	1.78	0.83	1.78	3.18	5.33	NF	NF
Tanjung Lompat	Apr-15	Sargassum paniculatum	NF	NF	2.33	5.33	NF	NF	2.97	5.78	NF	NF
Tanjung Lompat	Apr-15	Acanthophora spicifera	0.93	1.78	1.21	2.67	0.5	1.33	NF	NF	NF	NF
Tanjung Lompat	Apr-15	Gracilaria coronopifolia	0.82	2.67	0.71	1.78	NF	NF	NF	NF	NF	NF
Tanjung Lompat	May-15	Chaetomorpha spp.	6.92	16.89	NF	NF	1.1	2.67	0.83	2.67	0.82	1.78
Tanjung Lompat	May-15	Ulva intestinalis	1.4	3.56	3.65	8	3.97	8.89	NF	NF	NF	NF
Tanjung Lompat	May-15	Ceratodictyon intricatum	2.05	4.89	0.74	1.33	NF	NF	1.73	4	NF	NF
Tanjung Lompat	May-15	Dictyota mertensii	0.68	1.33	0.58	0.89	0.88	2.22	NF	NF	NF	NF
Tanjung Lompat	May-15	Padina minor	1.39	3.11	3.33	7.11	3.88	8.44	0.62	1.78	NF	NF
Tanjung Lompat	May-15	Sargassum oligocystum	0.92	1.78	1.08	1.78	2.24	4	2.89	5.33	NF	NF
Tanjung Lompat	May-15	Sargassum paniculatum	NF	NF	3.29	8.44	1.64	3.11	3	5.78	NF	NF
Tanjung Lompat	May-15	Acetabularia acetabulum	0.17	0.89	0.31	1.33	NF	NF	NF	NF	NF	NF
Tanjung Lompat	May-15	Acanthophora spicifera	0.97	1.78	0.83	1.78	0.5	1.33	NF	NF	NF	NF
Tanjung Lompat	May-15	Crassiphycus changii	1.43	4	1.24	2.67	NF	NF	NF	NF	NF	NF
Tanjung Lompat	Jun-15	Chaetomorpha spp.	7.07	16.44	NF	NF	1.35	2.67	NF	NF	0.6	1.78
Tanjung Lompat	Jun-15	Ulva intestinalis	1.46	3.11	3.18	8	3.15	6.22	NF	NF	NF	NF
Tanjung Lompat	Jun-15	Ceratodictyon intricatum	1.54	4	NF	NF	NF	NF	1.49	4	NF	NF
Tanjung Lompat	Jun-15	Dictyota mertensii	1.08	2.67	NF	NF	0.53	0.89	NF	NF	NF	NF
Tanjung Lompat	Jun-15	Padina minor	1.42	3.11	3.28	7.11	2.63	4.44	0.94	1.78	NF	NF
Tanjung Lompat	Jun-15	Sargassum oligocystum	0.83	1.78	1.08	1.78	2.81	4.44	2.25	5.33	NF	NF
Tanjung Lompat	Jun-15	Sargassum paniculatum	NF	NF	3.26	8.44	1.53	3.56	2.65	5.78	NF	NF
Tanjung Lompat	Jun-15	Dictyota dichotoma	NF	NF	0.08	0.44	NF	NF	NF	NF	NF	NF
Tanjung Lompat	Jun-15	Dictyopteris delicatula	NF	NF	0.44	1.78	NF	NF	NF	NF	NF	NF
Tanjung Lompat	Jun-15	Acetabularia acetabulum	0.31	0.89	0.5	1.33	NF	NF	NF	NF	NF	NF
Tanjung Lompat	Jun-15	Acanthophora spicifera	0.42	1.33	0.31	0.89	NF	NF	NF	NF	NF	NF
Tanjung Lompat	Jun-15	Gracilaria bursa-pastoris	NF	NF	NF	NF	0.17	0.44	NF	NF	NF	NF
Tanjung Lompat	Jul-15	Chaetomorpha spp.	7.13	16.44	NF	NF	0.04	0.44	NF	NF	0.82	2.22
Tanjung Lompat	Jul-15	Ulva intestinalis	1.44	2.67	2.42	5.78	2.58	6.22	NF	NF	NF	NF
Tanjung Lompat	Jul-15	Galaxaura rugosa	0.26	0.44	0.53	1.33	1.67	3.11	NF	NF	NF	NF
Tanjung Lompat	Jul-15	Ceratodictyon intricatum	0.31	1.33	NF	NF	NF	NF	0.83	2.22	NF	NF
Tanjung Lompat	Jul-15	Dictyota mertensii	0.28	0.44	NF	NF	0.28	0.44	NF	NF	NF	NF
Tanjung Lompat	Jul-15	Caulerpa racemosa	1.08	2.22	2.25	4.89	NF	NF	NF	NF	NF	NF
Tanjung Lompat	Jul-15	Padina minor	1.36	2.67	2.51	4.44	0.39	0.89	0.71	1.33	NF	NF
Tanjung Lompat	Jul-15	Sargassum oligocystum	1.35	1.78	3.24	7.56	2.92	4.44	0.5	1.33	NF	NF
Tanjung Lompat	Jul-15	Sargassum paniculatum	0.38	0.89	0.38	0.89	2.28	4	NF	NF	NF	NF
Tanjung Lompat	Jul-15	Sargassum microcystum	0.53	4	1.4	3.11	2.92	4.44	NF	NF	NF	NF
Tanjung Lompat	Jul-15	Sargassum tenerrimum	NF	NF	NF	NF	2.13	4.89	NF	NF	NF	NF
Tanjung Lompat	Jul-15	Acanthophora muscoides	NF	NF	0.08	0.89	0.75	1.33	NF	NF	NF	NF
Tanjung Lompat	Jul-15	Dictyota dichotoma	NF	NF	0.58	1.78	0.89	1.78	NF	NF	NF	NF
Tanjung Lompat	Jul-15	Dictyopteris delicatula	NF	NF	0.58	1.78	NF	NF	NF	NF	NF	NF
Tanjung Lompat	Jul-15	Polysiphonia coacta	NF	NF	0.83	2.22	NF	NF	NF	NF	NF	NF
Tanjung Lompat	Jul-15	Acetabularia acetabulum	NF	NF	1.01	2.67	NF	NF	NF	NF	NF	NF
Tanjung Lompat	Aug-15	Chaetomorpha spp.	7.28	16.89	NF	NF	1.65	4.44	NF	NF	1.06	2.22
Tanjung Lompat	Aug-15	Ulva intestinalis	1	2.67	2.32	5.78	2.53	6.22	NF	NF	NF	NF
Tanjung Lompat	Aug-15	Galaxaura rugosa	1.13	2.22	0.6	1.33	NF	NF	NF	NF	NF	NF
Tanjung Lompat	Aug-15	Caulerpa racemosa	1.25	2.22	0.6	1.33	NF	NF	NF	NF	NF	NF
Tanjung Lompat	Aug-15	Padina minor	NF	NF	NF	NF	0.7	2.22	NF	NF	NF	NF
Tanjung Lompat	Aug-15	Sargassum oligocystum	1.67	3.11	2.62	4.44	2.9	4.44	2.14	5.33	NF	NF
Tanjung Lompat	Aug-15	Sargassum paniculatum	0.49	1.33	3.38	7.56	2.07	4.89	2.72	5.78	NF	NF
Tanjung Lompat	Aug-15	Sargassum microcystum	0.6	1.33	1.18	2.67	0.83	1.33			NF	NF
Tanjung Lompat	Aug-15	Sargassum tenerrimum	NF	NF	NF	NF	0.86	2.22	1.06	1.33	NF	NF
Tanjung Lompat	Aug-15	Acanthophora muscoides	NF	NF	1.18	2.67	NF	NF	NF	NF	NF	NF
Tanjung Lompat	Aug-15	Dictyota dichotoma	NF	NF	0.17	0.89	NF	NF	NF	NF	NF	NF
Tanjung Lompat	Aug-15	Polysiphonia coacta	NF	NF	0.04	0.44	NF	NF	NF	NF	NF	NF
Tanjung Lompat	Sep-15	Chaetomorpha spp.	7.02	16.89	NF	NF	1.67	4.44	NF	NF	0.93	2.22
Tanjung Lompat	Sep-15	Ulva intestinalis	0.79	2.67	1.58	1.44	2.19	6.22	NF	NF	NF	NF
Tanjung Lompat	Sep-15	Galaxaura rugosa	0.76	1.78	0.38	0.89	NF	NF	NF	NF	NF	NF
Tanjung Lompat	Sep-15	Caulerpa racemosa	0.62	1.33	NF	NF	NF	NF	NF	NF	NF	NF
Tanjung Lompat	Sep-15	Padina minor	NF	NF	1.45	2.67	NF	NF	NF	NF	NF	NF
Tanjung Lompat	Sep-15	Sargassum oligocystum	1.61	3.11	1.45	2.67	2.92	4.44	1.25	4	NF	NF
Tanjung Lompat	Sep-15	Sargassum paniculatum	0.6	1.33	3.42	7.56	1.42	3.56	2.54	5.78	NF	NF
Tanjung Lompat	Sep-15	Sargassum microcystum	0.5	1.33	1.94	3.56	0.82	1.33	NF	NF	NF	NF
Tanjung Lompat	Sep-15	Sargassum tenerrimum	NF	NF	1.28	2.67	1.11	2.22	0.97	1.33	NF	NF
Tanjung Lompat	Sep-15	Cladophora vagabunda	NF	NF	0.94	2.22	NF	NF	NF	NF	NF	NF
Tanjung Lompat	Sep-15	Acanthophora spicifera	0.5	1.33	NF	NF	0.38	1.33	NF	NF	NF	NF
Tanjung Lompat	Sep-15	Jania adherens	0.5	1.33	0.31	0.89	0.6	1.33	NF	NF	NF	NF
Tanjung Lompat	Oct-15	Chaetomorpha spp.	7.81	19.11	NF	NF	1.47	5.78	NF	NF	1.06	2.22
Tanjung Lompat	Oct-15	Ulva intestinalis	0.42	1.33	0.83	1.78	0.83	1.33	NF	NF	NF	NF
Tanjung Lompat	Oct-15	Sargassum oligocystum	0.82	1.33	4.37	8.89	2.81	4	1.42	4	NF	NF
Tanjung Lompat	Oct-15	Sargassum paniculatum	0.92	1.33	3.53	7.11	1.81	3.11	2.33	5.78	NF	NF
Tanjung Lompat	Oct-15	Sargassum microcystum	0.49	1.33	2.86	5.78	0.95	1.78	NF	NF	NF	NF
Tanjung Lompat	Oct-15	Sargassum tenerrimum	NF	NF	0.42	0.89	1.42	2.67	0.93	1.33	NF	NF
Tanjung Lompat	Oct-15	Acanthophora spicifera	0.6	1.33	1.33	2.67	0.31	1.33	NF	NF	NF	NF
Tanjung Lompat	Oct-15	Jania adherens	0.5	1.33	0.79	2.67	0.72	1.33	NF	NF	NF	NF
Tanjung Lompat	Nov-15	Chaetomorpha spp.	5.49	12.89	NF	NF	1.64	5.78	NF	NF	1.06	2.22
Tanjung Lompat	Nov-15	Ulva intestinalis	0.39	1.33	0.71	1.78	0.83	1.33	NF	NF	NF	NF
Tanjung Lompat	Nov-15	Sargassum oligocystum	0.69	1.33	3.47	7.11	2.28	4.44	0.6	1.33	NF	NF
Tanjung Lompat	Nov-15	Sargassum paniculatum	NF	NF	3.25	7.11	1.28	3.11	2.01	3.56	NF	NF
Tanjung Lompat	Nov-15	Sargassum microcystum	0.6	1.33	2.57	4.89	0.83	1.78	NF	NF	NF	NF
Tanjung Lompat	Nov-15	Sargassum tenerrimum	NF	NF	NF	NF	1.33	2.67	0.53	1.33	NF	NF
Tanjung Lompat	Nov-15	Acanthophora spicifera	0.5	1.33	0.9	2.67	NF	NF	NF	NF	NF	NF
Tanjung Lompat	Nov-15	Hypnea spinella	NF	NF	0.92	2.22	0.65	1.78	NF	NF	NF	NF
Tanjung Lompat	Nov-15	Hypnea cervicornis	NF	NF	0.38	1.33	NF	NF	NF	NF	NF	NF
Tanjung Lompat	Nov-15	Canistrocarpus cervicornis	NF	NF	0.31	1.33	NF	NF	NF	NF	NF	NF
Tanjung Lompat	Nov-15	Ulva clathrata	0.81	3.56	NF	NF	NF	NF	NF	NF	NF	NF
