# Supplementary material for: Spatial and temporal distribution dataset of benthic macroalgae during the 2015-2016 tropical monsoonal cycle in Malaysia
Source: Biodivers Data J. 2022 Jul 26;10:e85676. doi: 10.3897/BDJ.10.e85676 (PMC9848546; doi:10.3897/BDJ.10.e85676)
Supplement: Supplementary material 2 — Raw data of cover and frequency of macroalgae recorded at Pantai Pasir Lanun [file bdj-10-e85676-s002.csv]

Sampling period	Quadrat	Species	Vertical count (Multiplier)_TL1	No.of sub-quadrat_TL1	Vertical count (Multiplier)_TL2	No.of sub-quadrat_TL2	Vertical count (Multiplier)_TL3	No.of sub-quadrat_TL3	Vertical count (Multiplier)_TL4	No.of sub-quadrat_TL4	Vertical count (Multiplier)_TL5	No.of sub-quadrat_TL5	Vertical count (Multiplier)_TL6	No.of sub-quadrat_TL6	Vertical count (Multiplier)_TL7	No.of sub-quadrat_TL7	Vertical count (Multiplier)_TL8	No.of sub-quadrat_TL8	Vertical count (Multiplier)_TL9	No.of sub-quadrat_TL9
Jan-15	5 meter	Gracilaria salicornia	2 (3.0), 2 (0.375)	4	NF	NF	NF	NF	NF	NF	NF	NF	NF	NF	NF	NF	NF	NF	NF	NF
Jan-15	5 meter	Chaetomorpha spp.	NF	NF	NF	NF	NF	NF	3 (4.0), 4 (0.1875)	7	NF	NF	NF	NF	NF	NF	NF	NF	NF	NF
Jan-15	6 meter	Pterocladiella caloglossoides	NF	NF	NF	NF	NF	NF	NF	NF	3 (0.375), 1 (0.375)	4	NF	NF	NF	NF	NF	NF	NF	NF
Jan-15	6 meter	Gracilaria salicornia	NF	NF	NF	NF	NF	NF	NF	NF	1 (3.0), 3 (0.75)	4	NF	NF	NF	NF	NF	NF	NF	NF
Jan-15	7 meter	Chaetomorpha spp.	NF	NF	4 (1.5), 9 (0.375)	13	NF	NF	NF	NF	NF	NF	NF	NF	NF	NF	NF	NF	NF	NF
Jan-15	7 meter	Pterocladiella caloglossoides	NF	NF	NF	NF	NF	NF	1 (3.0), 3 (0.75)	4	NF	NF	NF	NF	NF	NF	NF	NF	NF	NF
Jan-15	8 meter	Chaetomorpha spp.	1 (3.0), 1 (0.75)	2	NF	NF	NF	NF	NF	NF	NF	NF	NF	NF	NF	NF	NF	NF	NF	NF
Jan-15	8 meter	Ceratodictyon intricatum	NF	NF	NF	NF	NF	NF	NF	NF	4 (1.5), 5 (0.375)	9	3 (1.5), 3 (0.375), 3 (0.1875)	9	NF	NF	NF	NF	NF	NF
Jan-15	9 meter	Gracilaria salicornia	NF	NF	NF	NF	2 (0.75), 3 (0.375)	5	NF	NF	2 (3.0), 3 (0.375)	7	NF	NF	NF	NF	NF	NF	NF	NF
Jan-15	9 meter	Ceratodictyon intricatum	NF	NF	NF	NF	NF	NF	NF	NF	2 (1.5), 5 (0.375)	7	2 (3.0), 2 (1.5), 1 (0.75)	5	NF	NF	NF	NF	NF	NF
Jan-15	9 meter	Chaetomorpha spp.	NF	NF	NF	NF	NF	NF	NF	NF	NF	NF	3 (1.5), 3 (0.375)	6	NF	NF	NF	NF	NF	NF
Jan-15	10 meter	Pterocladiella caloglossoides	2 (1.5), 5 (0.375)	7	NF	NF	NF	NF	NF	NF	NF	NF	NF	NF	NF	NF	NF	NF	NF	NF
Jan-15	10 meter	Gracilaria salicornia	1 (3.0), 1 (0.75)	2	NF	NF	2 (3.0), 3 (0.375)	5	NF	NF	NF	NF	NF	NF	NF	NF	NF	NF	NF	NF
Jan-15	11 meter	Pterocladiella caloglossoides	NF	NF	3 (3.0), 5 (0.75)	8	NF	NF	NF	NF	NF	NF	NF	NF	NF	NF	NF	NF	NF	NF
Jan-15	11 meter	Ceratodictyon intricatum	1 (3.0), 3 (0.75)	4	5 (1.5)	5	2 (1.5), 3 (0.1875)	5	NF	NF	NF	NF	NF	NF	NF	NF	NF	NF	NF	NF
Jan-15	11 meter	Chaetomorpha spp.	NF	NF	NF	NF	NF	NF	NF	NF	NF	NF	NF	NF	NF	NF	2 (3.0), 5 (0.375)	7	NF	NF
Jan-15	12 meter	Ceratodictyon intricatum	5 (1.5)	5	1 (3.0), 7 (0.375)	8	3 (3.0), 3 (0.75)	6	1 (3.0), 3 (0.375)	3	1 (3.0), 3 (0.75)	4	2 (3.0), 3 (0.75)	5	NF	NF	NF	NF	NF	NF
Jan-15	12 meter	Gracilaria salicornia	NF	NF	2 (3.0), 3 (0.75), 2 (0.1875)	7	NF	NF	NF	NF	NF	NF	NF	NF	NF	NF	NF	NF	NF	NF
Jan-15	12 meter	Pterocladiella caloglossoides	NF	NF	NF	NF	NF	NF	NF	NF	2 (3.0), 5 (0.375)	7	NF	NF	NF	NF	NF	NF	NF	NF
Jan-15	12 meter	Chaetomorpha spp.	NF	NF	NF	NF	NF	NF	NF	NF	NF	NF	NF	NF	2 (3.0), 5 (0.375)	7	1 (3.0), 3 (0.75)	4	NF	NF
Jan-15	13 meter	Ceratodictyon intricatum	1 (3.0), 2 (0.375)	3	NF	NF	NF	NF	NF	NF	NF	NF	NF	NF	NF	NF	NF	NF	NF	NF
Jan-15	13 meter	Gracilaria salicornia	NF	NF	1 (3.0), 2 (0.375)	3	NF	NF	NF	NF	5 (1.5)	5	NF	NF	NF	NF	NF	NF	NF	NF
Jan-15	15 meter	Ceratodictyon intricatum	2 (3.0), 1 (1.5)	3	2 (3.0), 5 (0.375)	7	1 (3.0), 2 (1.5), 3 (0.75)	6	NF	NF	NF	NF	NF	NF	2 (3.0), 2 (0.375)	4	NF	NF	NF	NF
Jan-15	15 meter	Gracilaria salicornia	NF	NF	NF	NF	3 (3.0), 1 (0.375)	4	NF	NF	NF	NF	NF	NF	NF	NF	NF	NF	NF	NF
Jan-15	16 meter	Ceratodictyon intricatum	NF	NF	NF	NF	NF	NF	NF	NF	NF	NF	NF	NF	NF	NF	3 (0.75)	3	NF	NF
Jan-15	17 meter	Ceratodictyon intricatum	NF	NF	NF	NF	NF	NF	NF	NF	NF	NF	NF	NF	3 (3.0), 4 (0.375)	7	9 (3.0), 3 (0.75), 1 (0.1875)	13	NF	NF
Jan-15	18 meter	Ceratodictyon intricatum	NF	NF	NF	NF	NF	NF	NF	NF	NF	NF	NF	NF	NF	NF	NF	NF	4 (3.0), 2 (0.375)	6
Feb-15	5 meter	Gracilaria salicornia	2 (3.0), 2 (0.75)	4	NF	NF	NF	NF	NF	NF	NF	NF	NF	NF	NF	NF	NF	NF	NF	NF
Feb-15	5 meter	Chaetomorpha spp.	NF	NF	NF	NF	NF	NF	4 (3.0), 5 (0.375)	9	NF	NF	NF	NF	NF	NF	NF	NF	NF	NF
Feb-15	6 meter	Gracilaria salicornia	3 (0.75), 3 (0.1875)	6	NF	NF	NF	NF	NF	NF	1 (3.0), 5 (0.375)	6	NF	NF	NF	NF	NF	NF	NF	NF
Feb-15	6 meter	Sargassum polycystum	6 (1.5), 1 (0.375)	7	2 (3.0), 3 (0.75)	5	NF	NF	3 (3.0), 2 (0.375)	5	NF	NF	NF	NF	NF	NF	NF	NF	NF	NF
Feb-15	6 meter	Sargassum paniculatum	NF	NF	NF	NF	NF	NF	7 (1.5)	7	NF	NF	NF	NF	NF	NF	NF	NF	NF	NF
Feb-15	6 meter	Pterocladiella caloglossoides	NF	NF	NF	NF	NF	NF	NF	NF	2 (1.5), 1 (0.375)	3	NF	NF	NF	NF	NF	NF	NF	NF
Feb-15	7 meter	Sargassum polycystum	1 (3.0), 3 (0.75)	4	3 (3.0), 3 (0.75)	6	NF	NF	NF	NF	2 (3.0), 2 (0.375)	4	1 (3.0), 1 (0.375)	2	NF	NF	NF	NF	NF	NF
Feb-15	7 meter	Chaetomorpha spp.	NF	NF	2 (3.0), 3 (0.75), 2 (0.1875)	7	NF	NF	NF	NF	NF	NF	NF	NF	NF	NF	NF	NF	NF	NF
Feb-15	7 meter	Pterocladiella caloglossoides	NF	NF	NF	NF	NF	NF	1 (3.0), 3 (0.75)	4	NF	NF	NF	NF	NF	NF	NF	NF	NF	NF
Feb-15	7 meter	Sargassum paniculatum	NF	NF	NF	NF	NF	NF	NF	NF	1 (3.0), 2 (0.375)	3	NF	NF	NF	NF	NF	NF	NF	NF
Feb-15	7 meter	Gracilaria salicornia	NF	NF	NF	NF	NF	NF	NF	NF	NF	NF	3 (0.75)	3	NF	NF	NF	NF	NF	NF
Feb-15	8 meter	Chaetomorpha spp.	1 (3.0), 5 (0.375)	6	NF	NF	NF	NF	NF	NF	NF	NF	NF	NF	NF	NF	NF	NF	NF	NF
Feb-15	8 meter	Sargassum paniculatum	NF	NF	NF	NF	3 (1.5), 3 (0.75)	6	NF	NF	3 (1.5), 3 (0.75)	6	NF	NF	NF	NF	NF	NF	NF	NF
Feb-15	8 meter	Ceratodictyon intricatum	NF	NF	NF	NF	NF	NF	4 (1.5), 2 0.75)	6	NF	NF	1 (3.0), 3 (0.75)	4	NF	NF	NF	NF	NF	NF
Feb-15	9 meter	Gracilaria salicornia	NF	NF	NF	NF	2 (3.0), 2 (0.75)	4	NF	NF	3 (3.0), 1 (0.75)	4	NF	NF	NF	NF	NF	NF	NF	NF
Feb-15	9 meter	Ceratodictyon intricatum	NF	NF	NF	NF	NF	NF	NF	NF	2 (3.0), 3 (0.75), 2 (0.1875)	7	3 (3.0), 2 (0.1875)	5	NF	NF	NF	NF	NF	NF
Feb-15	9 meter	Chaetomorpha spp.	NF	NF	NF	NF	NF	NF	NF	NF	NF	NF	4 (1.5)	4	NF	NF	NF	NF	NF	NF
Feb-15	10 meter	Gracilaria salicornia	2 (3.0), 2 (0.75)	4	NF	NF	2 (3.0), 3 (0.75)	5	NF	NF	NF	NF	NF	NF	NF	NF	NF	NF	NF	NF
Feb-15	10 meter	Pterocladiella caloglossoides	2 (3.0), 3 (0.75)	5	NF	NF	NF	NF	NF	NF	NF	NF	NF	NF	NF	NF	NF	NF	NF	NF
Feb-15	11 meter	Ceratodictyon intricatum	2 (1.5), 1 (0.375)	3	5 (1.5)	5	2 (3.0), 1 (1.5)	3	NF	NF	NF	NF	NF	NF	NF	NF	NF	NF	NF	NF
Feb-15	11 meter	Pterocladiella caloglossoides	NF	NF	6 (1.5), 3 (0.75)	9	NF	NF	NF	NF	NF	NF	NF	NF	NF	NF	NF	NF	NF	NF
Feb-15	11 meter	Chaetomorpha spp.	NF	NF	NF	NF	NF	NF	NF	NF	NF	NF	NF	NF	NF	NF	2 (3.0), 4 (0.1875)	6	NF	NF
Feb-15	12 meter	Ceratodictyon intricatum	2 (3.0), 3 (0.75)	5	2 (3.0), 1 (1.5)	3	6 (1.5), 1 (0.375)	7	NF	NF	2 (3.0), 1 (0.1875)	3	3 (3.0), 1 (0.1875)	4	NF	NF	NF	NF	NF	NF
Feb-15	12 meter	Pterocladiella caloglossoides	NF	NF	NF	NF	NF	NF	NF	NF	2 (3.0), 2 (0.1875)	4	NF	NF	NF	NF	NF	NF	NF	NF
Feb-15	12 meter	Chaetomorpha spp.	NF	NF	NF	NF	NF	NF	NF	NF	NF	NF	NF	NF	4 (1.5), 5 (0.375)	9	1 (3.0), 5 (0.375)	6	NF	NF
Feb-15	13 meter	Ceratodictyon intricatum	1 (3.0), 5 (0.375)	3	NF	NF	NF	NF	NF	NF	NF	NF	NF	NF	NF	NF	NF	NF	NF	NF
Feb-15	13 meter	Gracilaria salicornia	NF	NF	1 (3.0), 7 (0.375)	8	NF	NF	NF	NF	3 (3.0), 1 (0.75)	4	NF	NF	NF	NF	NF	NF	NF	NF
Feb-15	14 meter	Chaetomorpha spp.	NF	NF			NF	NF	NF	NF	NF	NF	NF	NF	NF	NF	NF	NF	1 (3.0), 3 (0.75)	4
Feb-15	15 meter	Ceratodictyon intricatum	2 (3.0), 3 (0.375)	5	4 (1.5), 2 (0.1875)	6	3 (3.0), 1 (1.5)	4	NF	NF	NF	NF	NF	NF	2 (3.0), 2 (0.1875)	4	NF	NF	NF	NF
Feb-15	15 meter	Gracilaria salicornia	NF	NF	NF	NF	3 (3.0), 1 (0.75)	4	NF	NF	NF	NF	NF	NF	NF	NF	NF	NF	NF	NF
Feb-15	16 meter	Ceratodictyon intricatum	NF	NF	NF	NF	NF	NF	NF	NF	NF	NF	NF	NF	NF	NF	1 (3.0), 2 (0.1875)	3	NF	NF
Feb-15	17 meter	Ceratodictyon intricatum	NF	NF	NF	NF	NF	NF	NF	NF	NF	NF	NF	NF	6 (1.5), 1 (0.75)	7	9 (3.0), 3 (0.75)	12	NF	NF
Feb-15	18 meter	Ceratodictyon intricatum	NF	NF	NF	NF	NF	NF	NF	NF	NF	NF	NF	NF	NF	NF	NF	NF	3 (3.0), 3 (0.75)	6
Mar-15	5 meter	Gracilaria salicornia	2 (1.5), 2 (0.1875)	4	NF	NF	NF	NF	NF	NF	NF	NF	NF	NF	NF	NF	NF	NF	NF	NF
Mar-15	5 meter	Chaetomorpha spp.	NF	NF	NF	NF	NF	NF	4 (3.0), 3 (0.375)	7	NF	NF	NF	NF	NF	NF	NF	NF	NF	NF
Mar-15	6 meter	Gracilaria salicornia	3 (0.75)	3	NF	NF	NF	NF	NF	NF	1 (3.0), 1 (0.375)	2	NF	NF	NF	NF	NF	NF	NF	NF
Mar-15	6 meter	Sargassum polycystum	6 (1.5), 1 (0.375)	7	2 (3.0), 3 (0.75)	5	NF	NF	3 (3.0), 1 (0.375), 2 (0.1875)	6	NF	NF	NF	NF	NF	NF	NF	NF	NF	NF
Mar-15	6 meter	Sargassum paniculatum	NF	NF	NF	NF	NF	NF	7 (1.5)	7	NF	NF	NF	NF	NF	NF	NF	NF	NF	NF
Mar-15	6 meter	Pterocladiella caloglossoides	NF	NF	NF	NF	NF	NF	NF	NF	1 (3.0), 2 (0.1875)	3	NF	NF	NF	NF	NF	NF	NF	NF
Mar-15	7 meter	Sargassum polycystum	7 (0.75)	7	3 (3.0), 3 (0.75)	6	NF	NF	NF	NF	2 (3.0), 2 (0.375)	4	1 (3.0), 1 (0.375)	2	NF	NF	NF	NF	NF	NF
Mar-15	7 meter	Chaetomorpha spp.	NF	NF	2 (3.0), 3 (0.75)	5	NF	NF	NF	NF	NF	NF	NF	NF	NF	NF	NF	NF	NF	NF
Mar-15	7 meter	Pterocladiella caloglossoides	NF	NF	NF	NF	NF	NF	1 (3.0), 3 (0.75)	4	NF	NF	NF	NF	NF	NF	NF	NF	NF	NF
Mar-15	7 meter	Sargassum paniculatum	NF	NF	NF	NF	NF	NF	NF	NF	1 (3.0), 5 (0.375	6	NF	NF	NF	NF	NF	NF	NF	NF
Mar-15	7 meter	Gracilaria salicornia	NF	NF	NF	NF	NF	NF	NF	NF	NF	NF	1 (3.0), 5 (0.375)	6	NF	NF	NF	NF	NF	NF
Mar-15	8 meter	Chaetomorpha spp.	1 (3.0), 5 (0.375)	6	NF	NF	NF	NF	NF	NF	NF	NF	NF	NF	NF	NF	NF	NF	NF	NF
Mar-15	8 meter	Sargassum paniculatum	NF	NF	NF	NF	1 (3.0), 3 (0.75), 2 (0.1875)	6	NF	NF	1 (3.0), 3 (0.75)	4	NF	NF	NF	NF	NF	NF	NF	NF
Mar-15	8 meter	Ceratodictyon intricatum	NF	NF	NF	NF	NF	NF	1 (3.0), 6 (0.75)	7	NF	NF	1 (3.0), 3 (0.75)	4	NF	NF	NF	NF	NF	NF
Mar-15	9 meter	Gracilaria salicornia	NF	NF	NF	NF	4 (1.5), 1 (0.75)	5	NF	NF	1 (3.0), 3 (0.75)	4	NF	NF	NF	NF	NF	NF	NF	NF
Mar-15	9 meter	Ceratodictyon intricatum	NF	NF	NF	NF	NF	NF	NF	NF	3 (3.0), 1 (0.375), 2 (0.1875)	6	3 (3.0), 1 (0.375), 2 (0.1875)	6	NF	NF	NF	NF	NF	NF
Mar-15	9 meter	Chaetomorpha spp.	NF	NF	NF	NF	NF	NF	NF	NF	NF	NF	2 (3.0)	4	NF	NF	NF	NF	NF	NF
Mar-15	10 meter	Gracilaria salicornia	3 (1.5)	3	NF	NF	2 (3.0), 2 (0.75)	4	NF	NF	NF	NF	NF	NF	NF	NF	NF	NF	NF	NF
Mar-15	10 meter	Pterocladiella caloglossoides	2 (3.0), 3 (0.75)	5	NF	NF	NF	NF	NF	NF	NF	NF	NF	NF	NF	NF	NF	NF	NF	NF
Mar-15	11 meter	Ceratodictyon intricatum	1 (3.0), 3 (0.75), 2 (0.1875)	6	5 (1.5)	5	2 (3.0), 1 (1.5)	3	NF	NF	NF	NF	NF	NF	NF	NF	NF	NF	NF	NF
Mar-15	11 meter	Pterocladiella caloglossoides	NF	NF	3 (3.0), 3 (0.75)	6	NF	NF	NF	NF	NF	NF	NF	NF	NF	NF	NF	NF	NF	NF
Mar-15	11 meter	Chaetomorpha spp.	NF	NF	NF	NF	NF	NF	NF	NF	NF	NF	NF	NF	NF	NF	1 (3.0), 6 (0.75)	7	NF	NF
Mar-15	12 meter	Ceratodictyon intricatum	2 (3.0), 3 (0.75)	5	2 (3.0), 1 (0.75)	3	6 (1.5), 1 (0.375)	7	NF	NF	2 (3.0), 2 (0.375)	4	2 (3.0), 2 (0.75)	4	NF	NF	NF	NF	NF	NF
Mar-15	12 meter	Gracilaria salicornia	NF	NF	4 (1.5), 2 0.75)	6	NF	NF	NF	NF	NF	NF	NF	NF	NF	NF	NF	NF	NF	NF
Mar-15	12 meter	Pterocladiella caloglossoides	NF	NF	NF	NF	NF	NF	NF	NF	1 (3.0), 6 (0.75)	7	NF	NF	NF	NF	NF	NF	NF	NF
Mar-15	12 meter	Chaetomorpha spp.	NF	NF	NF	NF	NF	NF	NF	NF	NF	NF	NF	NF	2 (3.0), 2 (0.375)	4	2 (1.5), 3 (0.75)	5	NF	NF
Mar-15	13 meter	Ceratodictyon intricatum	1 (3.0), 5 (0.375)	3	NF	NF	NF	NF	NF	NF	NF	NF	NF	NF	NF	NF	NF	NF	NF	NF
Mar-15	13 meter	Gracilaria salicornia	NF	NF	2 (1.5), 1 (0.75)	3	NF	NF	NF	NF	2 (3.0), 2 (0.375)	4	NF	NF	NF	NF	NF	NF	NF	NF
Mar-15	14 meter	Chaetomorpha spp.	NF	NF	NF	NF	NF	NF	NF	NF	NF	NF	NF	NF	NF	NF	NF	NF	1 (3.0), 3 (0.75)	4
Mar-15	15 meter	Ceratodictyon intricatum	4 (1.5), 2 0.75)	6	4 (1.5)	4	7 (1.5)	7	NF	NF	NF	NF	NF	NF	2 (3.0)< 2 (0.1875)	4	NF	NF	NF	NF
Mar-15	15 meter	Gracilaria salicornia	NF	NF	NF	NF	1 (3.0), 3 (0.375)	4	NF	NF	NF	NF	NF	NF	NF	NF	NF	NF	NF	NF
Mar-15	16 meter	Ceratodictyon intricatum	NF	NF	NF	NF	NF	NF	NF	NF	NF	NF	NF	NF	NF	NF	2 (1.5), 1 (0.375)	3	NF	NF
Mar-15	17 meter	Ceratodictyon intricatum	NF	NF	NF	NF	NF	NF	NF	NF	NF	NF	NF	NF	3 (3.0), 1 (0.75)	7	9 (3.0), 3 (0.75)	12	NF	NF
Mar-15	18 meter	Ceratodictyon intricatum	NF	NF	NF	NF	NF	NF	NF	NF	NF	NF	NF	NF	NF	NF	NF	NF	3 (3.0), 3 (0.75)	6
Apr-15	5 meter	Chaetomorpha spp.	NF	NF	NF	NF	NF	NF	4 (3.0), 2 (0.75)	6	NF	NF	NF	NF	NF	NF	NF	NF	NF	NF
Apr-15	6 meter	Sargassum polycystum	3 (3.0), 3 (0.75)	6	2 (3.0), 2 (0.375)	4	NF	NF	6 (1.5), 1 (0.375)	7	NF	NF	NF	NF	NF	NF	NF	NF	NF	NF
Apr-15	6 meter	Sargassum paniculatum	NF	NF	NF	NF	NF	NF	3 (3.0), 3 (0.75)	6	NF	NF	NF	NF	NF	NF	NF	NF	NF	NF
Apr-15	6 meter	Pterocladiella caloglossoides	NF	NF	NF	NF	NF	NF	NF	NF	1 (3.0), 2 (0.75)	3	NF	NF	NF	NF	NF	NF	NF	NF
Apr-15	7 meter	Sargassum polycystum	2 (3.0), 5 (0.375)	7	3 (3.0), 2 (0.375)	5	2 (3.0), 4 (0.1875)	6	NF	NF	2 (3.0), 4 (0.1875)	6	3 (0.75)	3	NF	NF	NF	NF	NF	NF
Apr-15	7 meter	Chaetomorpha spp.	NF	NF	2 (3.0), 4 (0.1875)	6	NF	NF	NF	NF	NF	NF	NF	NF	NF	NF	NF	NF	NF	NF
Apr-15	7 meter	Pterocladiella caloglossoides	NF	NF	NF	NF	NF	NF	2 (1.5), 3 (0.75)	5	NF	NF	NF	NF	NF	NF	NF	NF	NF	NF
Apr-15	7 meter	Sargassum paniculatum	NF	NF	NF	NF	NF	NF	NF	NF	1 (3.0), 2 (0.75)	3	NF	NF	NF	NF	NF	NF	NF	NF
Apr-15	8 meter	Chaetomorpha spp.	2 (3.0), 3 (0.75)	5	NF	NF	NF	NF	NF	NF	NF	NF	NF	NF	NF	NF	NF	NF	NF	NF
Apr-15	8 meter	Sargassum paniculatum	NF	NF	NF	NF	6 (1.5), 1 (0.75)	7			4 (1.5), 5 (0.375)	9	NF	NF	NF	NF	NF	NF	NF	NF
Apr-15	8 meter	Ceratodictyon intricatum	NF	NF	NF	NF	NF	NF	2 (1.5), 3 (0.75), 2 (0.1875)	7	NF	NF	2 (3.0), 3 (0.75)	5	NF	NF	NF	NF	NF	NF
Apr-15	9 meter	Gracilaria salicornia	NF	NF	NF	NF	NF	NF	NF	NF	NF	NF	NF	NF	NF	NF	NF	NF	NF	NF
Apr-15	9 meter	Ceratodictyon intricatum	NF	NF	NF	NF	NF	NF	NF	NF	3 (3.0), 2 (0.375)	5	6 (1.5), 1 (0.375)	7	NF	NF	NF	NF	NF	NF
Apr-15	9 meter	Chaetomorpha spp.	NF	NF	NF	NF	NF	NF	NF	NF	NF	NF	2 (3.0), 2 (0.375)	4	NF	NF	NF	NF	NF	NF
Apr-15	10 meter	Gracilaria salicornia	NF	NF	NF	NF	NF	NF	NF	NF	NF	NF	NF	NF	NF	NF	NF	NF	NF	NF
Apr-15	10 meter	Pterocladiella caloglossoides	4 (1.5), 5 (0.375)	9	NF	NF	NF	NF	NF	NF	NF	NF	NF	NF	NF	NF	NF	NF	NF	NF
Apr-15	11 meter	Ceratodictyon intricatum	1 (3.0), 3 (0.75), 2 (0.1875)	6	4 (1.5), 5 (0.375)	9	2 (3.0), 1 (0.75)	3	NF	NF	NF	NF	NF	NF	NF	NF	NF	NF	NF	NF
Apr-15	11 meter	Pterocladiella caloglossoides	NF	NF	7 (1.5)	7	NF	NF	NF	NF	NF	NF	NF	NF	NF	NF	NF	NF	NF	NF
Apr-15	11 meter	Chaetomorpha spp.	NF	NF	NF	NF	NF	NF	NF	NF	NF	NF	NF	NF	NF	NF	2 (3.0), 1 (1.5)	6	NF	NF
Apr-15	11 meter	Sargassum polycystum	NF	NF	NF	NF	NF	NF	NF	NF	NF	NF	NF	NF	1 (3.0), 2 (0.1875)	2	NF	NF	NF	NF
Apr-15	12 meter	Ceratodictyon intricatum	NF	NF	3 (0.75)	3	NF	NF	NF	NF	2 (1.5), 3 (0.75)	5	2 (3.0), 3 (0.75)	5	NF	NF	NF	NF	NF	NF
Apr-15	12 meter	Pterocladiella caloglossoides	NF	NF	NF	NF	NF	NF	NF	NF	5 (1.5)	5	NF	NF	NF	NF	NF	NF	NF	NF
Apr-15	12 meter	Chaetomorpha spp.	NF	NF	NF	NF	NF	NF	NF	NF	NF	NF	NF	NF	2 (3.0), 1 (0.75)	4	2 (1.5), 3 (0.75), 2 (0.1875)	7	NF	NF
Apr-15	12 meter	Sargassum polycystum	NF	NF	NF	NF	NF	NF	NF	NF	NF	NF	NF	NF	3 (0.75)	3	NF	NF	NF	NF
Apr-15	14 meter	Chaetomorpha spp.	NF	NF	NF	NF	NF	NF	NF	NF	NF	NF	NF	NF	NF	NF	NF	NF	2 (1.5), 3 (0.75), 2 (0.1875)	7
Apr-15	15 meter	Ceratodictyon intricatum	6 (1.5), 1 (0.375)	7	2 (3.0), 2 (0.375)	4	3 (3.0), 1 (1.5)	4	NF	NF	NF	NF	NF	NF	2 (3.0), 2 (0.375)	4	NF	NF	NF	NF
Apr-15	16 meter	Ceratodictyon intricatum	NF	NF	NF	NF	NF	NF	NF	NF	NF	NF	NF	NF	NF	NF	2 (1.5), 1 (0.75)	3	NF	NF
Apr-15	17 meter	Ceratodictyon intricatum	NF	NF	NF	NF	NF	NF	NF	NF	NF	NF	NF	NF	2 (3.0), 3 (0.75)	5	7 (3.0), 3 (0.375)	10	NF	NF
Apr-15	18 meter	Ceratodictyon intricatum	NF	NF	NF	NF	NF	NF	NF	NF	NF	NF	NF	NF	NF	NF	NF	NF	4 (3.0), 2 (0.375)	6
May-15	5 meter	Chaetomorpha spp.	NF	NF	NF	NF	NF	NF	6 (1.5), 1 (0.375)	7	NF	NF	NF	NF	NF	NF	NF	NF	NF	NF
May-15	5 meter	Sargassum polycystum	NF	NF	2 (3.0), 3 (0.375)	5	NF	NF	NF	NF	NF	NF	NF	NF	NF	NF	NF	NF	NF	NF
May-15	6 meter	Sargassum polycystum	7 (1.5)	7	5 (3.0), 1 (0.75)	6	NF	NF	3 (3.0), 3 (0.75)	6	NF	NF	NF	NF	NF	NF	NF	NF	NF	NF
May-15	6 meter	Sargassum paniculatum	NF	NF	NF	NF	NF	NF	7 (1.5)	7	NF	NF	NF	NF	NF	NF	NF	NF	NF	NF
May-15	7 meter	Sargassum polycystum	4 (3.0), 1 (1.5)	5	3 (3.0), 2 (0.1875)	5	2 (3.0), 1 (1.5)	6	NF	NF	3 (3.0), 2 (0.375)	5	2 (3.0), 1 (1.5)	6	NF	NF	NF	NF	NF	NF
May-15	7 meter	Chaetomorpha spp.	NF	NF	1 (3.0), 3 (0.375)	4	NF	NF	NF	NF	NF	NF	NF	NF	NF	NF	NF	NF	NF	NF
May-15	7 meter	Sargassum paniculatum	1 (3.0), 3 (0.375)	4	NF	NF	NF	NF	NF	NF	1 (3.0), 2 (0.375)	3	1 (3.0), 1 (0.75)	2	NF	NF	NF	NF	NF	NF
May-15	8 meter	Chaetomorpha spp.	2 (3.0), 1 (1.5)	6	NF	NF	NF	NF	NF	NF	NF	NF	NF	NF	NF	NF	NF	NF	NF	NF
May-15	8 meter	Sargassum paniculatum	NF	NF	1 (3.0), 3 (0.375)	4	2 (3.0), 3 (0.75)	5	NF	NF	1 (3.0), 3 (0.75), 2 (0.1875)	6	NF	NF	NF	NF	NF	NF	NF	NF
May-15	8 meter	Ceratodictyon intricatum	NF	NF	NF	NF	NF	NF	4 (0.75), 3 (0.375)	7	NF	NF	1 (3.0), 5 (0.75)	6	NF	NF	NF	NF	NF	NF
May-15	9 meter	Ceratodictyon intricatum	NF	NF	NF	NF	NF	NF	NF	NF	1 (3.0), 3 (0.375)	4	1 (3.0), 2 (0.375)	3	NF	NF	NF	NF	NF	NF
May-15	9 meter	Chaetomorpha spp.	NF	NF	NF	NF	NF	NF	NF	NF	NF	NF	2 (3.0), 2 (0.1875)	4	NF	NF	NF	NF	NF	NF
May-15	10 meter	Pterocladiella caloglossoides	2 (1.5), 2 (0.375)	4	NF	NF	NF	NF	NF	NF	NF	NF	NF	NF	NF	NF	NF	NF	NF	NF
May-15	10 meter	Sargassum polycystum	NF	NF	NF	NF	NF	NF	NF	NF	NF	NF	NF	NF	1 (3.0), 3 (0.75), 2 (0.1875)	6	NF	NF	NF	NF
May-15	11 meter	Chaetomorpha spp.	NF	NF	NF	NF	NF	NF	NF	NF	NF	NF	NF	NF	NF	NF	4 (0.75), 3 (0.375)	7	NF	NF
May-15	11 meter	Sargassum poycystum	NF	NF	NF	NF	NF	NF	NF	NF	NF	NF	NF	NF	1 (3.0), 3 (0.375), 7 (0.1875)	11	NF	NF	NF	NF
May-15	12 meter	Ceratodictyon intricatum	2 (3.0), 2 (0.375)	4	NF	NF	6 (1.5), 1 (0.375)	7	NF	NF	NF	NF	NF	NF	NF	NF	NF	NF	NF	NF
May-15	12 meter	Chaetomorpha spp.	NF	NF	NF	NF	NF	NF	NF	NF	NF	NF	2 (3.0), 3 (0.75)	5	2 (3.0), 2 (0.1875)	4	1 (3.0), 3 (0.375), 7 (0.1875)	11	NF	NF
May-15	12 meter	Sargassum poycystum	NF	NF	NF	NF	NF	NF	NF	NF	NF	NF	NF	NF	3 (3.0), 2 (0.375)	5	NF	NF	NF	NF
May-15	13 meter	Ceratodictyon intricatum	1 (3.0), 5 (0.375)	6	NF	NF	NF	NF	NF	NF	NF	NF	NF	NF	NF	NF	NF	NF	NF	NF
May-15	14 meter	Chaetomorpha spp.	NF	NF	NF	NF	NF	NF	NF	NF	NF	NF	NF	NF	NF	NF	NF	NF	2 (3.0), 2 (0.1875)	4
May-15	15 meter	Ceratodictyon intricatum	3 (3.0), 3 (0.75)	6	NF	NF	3 (3.0), 3 (0.75)	3	NF	NF	NF	NF	NF	NF	1 (3.0), 3 (0.375)	4	NF	NF	NF	NF
May-15	17 meter	Ceratodictyon intricatum	NF	NF	NF	NF	NF	NF	NF	NF	NF	NF	NF	NF	7(1.5)	7	22 (0.75)	22	NF	NF
May-15	18 meter	Ceratodictyon intricatum	NF	NF	NF	NF	NF	NF	NF	NF	NF	NF	NF	NF	NF	NF	NF	NF	3 (3.0), 3 (0.75)	6
Jun-15	6 meter	Sargassum polycystum	3 (3.0), 3 (0.75)	6	6 (1.5), 1 (0.375)	7	NF	NF	6 (1.5), 1 (0.375)	7	NF	NF	NF	NF	NF	NF	NF	NF	NF	NF
Jun-15	6 meter	Sargassum paniculatum	NF	NF	1 (3.0), 3 (0.75), 2 (0.1875)	6	NF	NF	3 (3.0), 3 (0.75)	6	NF	NF	NF	NF	NF	NF	NF	NF	NF	NF
Jun-15	7 meter	Sargassum polycystum	2 (3.0), 3 (0.375)	5	3 (3.0), 2 (0.375)	5	2 (3.0), 3 (0.375)	5	NF	NF	2 (3.0), 3 (0.75)	5	1 (3.0), 3 (0.75), 2 (0.1875)	6	NF	NF	NF	NF	NF	NF
Jun-15	7 meter	Pterocladiella caloglossoides	NF	NF	NF	NF	NF	NF	1 (3.0), 3 (0.75), 2 (0.1875)	6	NF	NF	NF	NF	NF	NF	NF	NF	NF	NF
Jun-15	7 meter	Sargassum paniculatum	NF	NF	NF	NF	NF	NF	NF	NF	1 (3.0), 2 (0.375)	3	NF	NF	NF	NF	NF	NF	NF	NF
Jun-15	8 meter	Chaetomorpha spp.	1 (3.0), 2 (0.75)	3	NF	NF	NF	NF	NF	NF	NF	NF	NF	NF	NF	NF	NF	NF	NF	NF
Jun-15	8 meter	Sargassum paniculatum	NF	NF	NF	NF	3 (3.0), 2 (0.375)	5	NF	NF	2 (3.0), 3 (0.375)	5	NF	NF	NF	NF	NF	NF	NF	NF
Jun-15	9 meter	Ceratodictyon intricatum	NF	NF	NF	NF	NF	NF	NF	NF	3 (3.0), 2 (0.375)	5	NF	NF	NF	NF	NF	NF	NF	NF
Jun-15	9 meter	Sargassum paniculatum	NF	NF	NF	NF	3 (3.0), 2 (0.375)	6	NF	NF	NF	NF	NF	NF	NF	NF	NF	NF	NF	NF
Jun-15	11 meter	Chaetomorpha spp.	NF	NF	NF	NF	NF	NF	NF	NF	NF	NF	NF	NF	NF	NF	4 (0.75), 5 (0.375)	9	NF	NF
Jun-15	11 meter	Sargassum polycystum	NF	NF	NF	NF	NF	NF	NF	NF	NF	NF	NF	NF	3 (3.0), 2 (0.75)	5	NF	NF	NF	NF
Jun-15	12 meter	Sargassum polycystum	NF	NF	NF	NF	NF	NF	NF	NF	NF	NF	NF	NF	2 (3.0), 2 (0.375)	4	NF	NF	NF	NF
Jun-15	13 meter	Sargassum polycystum	NF	NF	NF	NF	NF	NF	NF	NF	NF	NF	NF	NF	2 (3.0), 2 (0.75)	4	NF	NF	NF	NF
Jun-15	15 meter	Ceratodictyon intricatum	NF	NF	NF	NF	2 (1.5), 1 (0.375)	3	NF	NF	NF	NF	NF	NF	NF	NF	NF	NF	NF	NF
Jun-15	17 meter	Ceratodictyon intricatum	NF	NF	NF	NF	NF	NF	NF	NF	NF	NF	NF	NF	NF	NF	1 (3.0), 6 (1.5), 3 (0.375)	10	NF	NF
Jun-15	18 meter	Ceratodictyon intricatum	NF	NF	NF	NF	NF	NF	NF	NF	NF	NF	NF	NF	NF	NF	NF	NF	2 (3.0), 2 (0.75)	4
Jul-15	6 meter	Sargassum polycystum	4 (3.0), 2 (0.375)	7	2 (3.0), 3 (0.75)	5	NF	NF	3 (3.0), 1 (1.5)	4	NF	NF	NF	NF	NF	NF	NF	NF	NF	NF
Jul-15	6 meter	Sargassum paniculatum	NF	NF	2 (3.0), 1 (1.5)	6	NF	NF	7 (1.5), 3 (0.75)	10	NF	NF	NF	NF	NF	NF	NF	NF	NF	NF
Jul-15	7 meter	Sargassum polycystum	1 (3.0), 3 (0.75), 2 (0.1875)	6	5 (1.5), 5 (0.375)	10	2 (3.0), 5 (0.375)	7	NF	NF	3 (3.0), 1 (0.75)	4	2 (3.0), 1 (1.5)	6	NF	NF	NF	NF	NF	NF
Jul-15	7 meter	Pterocladiella caloglossoides	NF	NF	NF	NF	NF	NF	NF	NF	1 (3.0), 3 (0.75), 2 (0.1875)	6	NF	NF	NF	NF	NF	NF	NF	NF
Jul-15	7 meter	Sargassum paniculatum	NF	NF	NF	NF	1 (3.0), 1 (0.375)	2	NF	NF	NF	NF	NF	NF	NF	NF	NF	NF	NF	NF
Jul-15	8 meter	Sargassum paniculatum	NF	NF	NF	NF	3 (3.0), 3 (0.75)	6	NF	NF	2 (3.0), 1 (1.5)	6	NF	NF	NF	NF	NF	NF	NF	NF
Jul-15	9 meter	Sargassum paniculatum	NF	NF	NF	NF	3 (3.0), 1 (1.5)	4	NF	NF	NF	NF	1 (3.0), 3 (0.375)	4	NF	NF	NF	NF	NF	NF
Jul-15	11 meter	Sargassum polycystum	NF	NF	NF	NF	NF	NF	NF	NF	NF	NF	NF	NF	5 (3.0), 5 (1.5)	10	NF	NF	NF	NF
Jul-15	12 meter	Sargassum polycystum	NF	NF	NF	NF	NF	NF	NF	NF	NF	NF	NF	NF	2 (3.0), 1 (1.5)	6	NF	NF	NF	NF
Jul-15	12 meter	Sargassum paniculatum	NF	NF	NF	NF	NF	NF	NF	NF	NF	NF	NF	NF	3 (0.75)	3	NF	NF	NF	NF
Jul-15	13 meter	Sargassum polycystum	NF	NF	NF	NF	NF	NF	NF	NF	NF	NF	NF	NF	2 (3.0), 7 (0.375)	9	NF	NF	NF	NF
Aug-15	5 meter	Padina minor	2 (1.5), 1 (0.375)	3	NF	NF	NF	NF	NF	NF	NF	NF	NF	NF	NF	NF	NF	NF	NF	NF
Aug-15	6 meter	Sargassum polycystum	3 (3.0), 3 (0.75)	6	6 (1.5)	6	NF	NF	1 (3.0), 7 (0.375)	8	NF	NF	NF	NF	NF	NF	NF	NF	NF	NF
Aug-15	6 meter	Sargassum paniculatum	NF	NF	2 (3.0), 2 (0.1875)	4	NF	NF	2 (3.0), 2 (0.1875)	4	NF	NF	NF	NF	NF	NF	NF	NF	NF	NF
Aug-15	6 meter	Padina australis	NF	NF	NF	NF	3 (0.375)	3	NF	NF	NF	NF	NF	NF	NF	NF	NF	NF	NF	NF
Aug-15	7 meter	Sargassum polycystum	2 (3.0), 1 (1.5)	6	2 (3.0), 3 (0.75)	6	1 (3.0), 7 (0.375)	8	NF	NF	6 (1.5), 1 (0.375)	7	2 (3.0), 1 (1.5)	6	NF	NF	NF	NF	NF	NF
Aug-15	7 meter	Sargassum paniculatum	NF	NF	NF	NF	2 (3.0), 3 (0.75)	6	NF	NF	2 (3.0), 1 (1.5)	6	NF	NF	NF	NF	NF	NF	NF	NF
Aug-15	7 meter	Padina australis	NF	NF	NF	NF	2 (1.5), 1 (0.375)	3	NF	NF	NF	NF	8 (0.1875)	8	NF	NF	NF	NF	NF	NF
Aug-15	8 meter	Sargassum paniculatum	NF	NF	NF	NF	3 (3.0), 1 (0.375), 2 (0.1875)	6	NF	NF	2 (3.0), 1 (1.5)	6	NF	NF	NF	NF	NF	NF	NF	NF
Aug-15	8 meter	Padina minor	NF	NF	1 (3.0), 5 (0.375)	6	3 (1.5)	3	NF	NF	NF	NF	NF	NF	NF	NF	NF	NF	NF	NF
Aug-15	9 meter	Sargassum paniculatum	NF	NF	NF	NF	3 (3.0), 3 (0.75)	6	NF	NF	NF	NF	NF	NF	NF	NF	NF	NF	NF	NF
Aug-15	10 meter	Sargassum paniculatum	NF	NF	NF	NF	NF	NF	NF	NF	NF	NF	1 (3.0), 7 (0.375)	8	NF	NF	NF	NF	NF	NF
Aug-15	11 meter	Sargassum paniculatum	NF	NF	NF	NF	NF	NF	NF	NF	NF	NF	1 (3.0), 1 (0.375)	2	NF	NF	NF	NF	NF	NF
Aug-15	11 meter	Sargassum polycystum	NF	NF	NF	NF	NF	NF	NF	NF	NF	NF	NF	NF	6 (3.0), 5 (0.375)	11	NF	NF	NF	NF
Aug-15	12 meter	Sargassum polycystum	NF	NF	NF	NF	NF	NF	NF	NF	NF	NF	NF	NF	2 (3.0), 3 (0.75)	5	NF	NF	NF	NF
Aug-15	12 meter	Sargassum paniculatum	NF	NF	NF	NF	NF	NF	NF	NF	NF	NF	NF	NF	NF	NF	NF	NF	1 (3.0), 1 (0.375)	2
Aug-15	13 meter	Sargassum polycystum	NF	NF	NF	NF	NF	NF	NF	NF	NF	NF	NF	NF	2 (3.0), 3 (0.1875)	5	NF	NF	NF	NF
Sep-15	5 meter	Padina minor	1 (3.0), 7 (0.375)	8	NF	NF	NF	NF	NF	NF	NF	NF	NF	NF	NF	NF	NF	NF	NF	NF
Sep-15	5 meter	Padina australis	NF	NF	NF	NF	3 (0.75)	3	NF	NF	NF	NF	NF	NF	NF	NF	NF	NF	NF	NF
Sep-15	6 meter	Sargassum polycystum	3 (3.0), 1 (0.375), 2 (0.1875)	6	2 (3.0), 1 (1.5)	6	NF	NF	2 (3.0), 1 (1.5)	6	NF	NF	NF	NF	NF	NF	NF	NF	NF	NF
Sep-15	6 meter	Sargassum paniculatum	NF	NF	1 (3.0), 7 (0.375)	8	NF	NF	2 (3.0), 3 (0.75)	5	NF	NF	NF	NF	NF	NF	NF	NF	NF	NF
Sep-15	6 meter	Padina australis	NF	NF	NF	NF	1 (3.0), 5 (0.375)	6	NF	NF	3 (1.5)	3	NF	NF	NF	NF	NF	NF	NF	NF
Sep-15	6 meter	Padina minor	NF	NF	NF	NF	NF	NF	NF	NF	1 (3.0), 1 (0.375)	2	NF	NF	NF	NF	NF	NF	NF	NF
Sep-15	7 meter	Sargassum polycystum	2 (3.0), 5 (0.375)	7	2 (3.0), 3 (0.75)	5	1 (3.0), 7 (0.375)	8	NF	NF	2 (3.0), 3 (0.75)	5	2 (3.0), 2 (0.1875)	4	NF	NF	NF	NF	NF	NF
Sep-15	7 meter	Sargassum paniculatum	NF	NF	NF	NF	2 (3.0), 1 (0.1875)	3	NF	NF	2 (3.0), 5 (0.375)	7	NF	NF	NF	NF	NF	NF	NF	NF
Sep-15	7 meter	Padina australis	NF	NF	NF	NF	3 (1.5)	3	NF	NF	3 (0.75)	3	1 (3.0), 2 (0.375)	3	NF	NF	NF	NF	NF	NF
Sep-15	7 meter	Padina minor	NF	NF	1 (3.0), 2 (0.1875)	3	NF	NF	NF	NF	NF	NF	NF	NF	NF	NF	NF	NF	NF	NF
Sep-15	8 meter	Sargassum paniculatum	NF	NF	NF	NF	3 (3.0), 1 (0.375), 2 (0.1875)	6	NF	NF	2 (3.0), 1 (1.5)	6	NF	NF	NF	NF	NF	NF	NF	NF
Sep-15	8 meter	Padina minor	NF	NF	2 (3.0), 1 (1.5)	6	1 (3.0), 7 (0.375)	8	NF	NF	NF	NF	NF	NF	NF	NF	NF	NF	NF	NF
Sep-15	8 meter	Padina australis	NF	NF	NF	NF	NF	NF	NF	NF	1 (3.0), 3 (0.75)	4	NF	NF	NF	NF	NF	NF	NF	NF
Sep-15	9 meter	Sargassum paniculatum	NF	NF	NF	NF	3 (3.0), 1 (1.5)	6	NF	NF	NF	NF	NF	NF	NF	NF	NF	NF	NF	NF
Sep-15	10 meter	Sargassum paniculatum	NF	NF	NF	NF	NF	NF	NF	NF	NF	NF	2 (3.0), 1 (1.5)	6	NF	NF	NF	NF	NF	NF
Sep-15	11 meter	Sargassum polycystum	NF	NF	NF	NF	NF	NF	NF	NF	NF	NF	NF	NF	6 (3.0), 6 (0.75)	12	NF	NF	NF	NF
Sep-15	12 meter	Sargassum polycystum	NF	NF	NF	NF	NF	NF	NF	NF	NF	NF	NF	NF	3 (3.0), 3 (0.75)	6	NF	NF	NF	NF
Sep-15	13 meter	Sargassum polycystum	NF	NF	NF	NF	NF	NF	NF	NF	NF	NF	NF	NF	2 (3.0), 1 (1.5)	6	NF	NF	NF	NF
