# Supplementary material for: Spatial and temporal distribution dataset of benthic macroalgae during the 2015-2016 tropical monsoonal cycle in Malaysia
Source: Biodivers Data J. 2022 Jul 26;10:e85676. doi: 10.3897/BDJ.10.e85676 (PMC9848546; doi:10.3897/BDJ.10.e85676)
Supplement: Supplementary material 3 — Raw data of cover and frequency of macroalgae recorded at Pulau Mawar [file bdj-10-e85676-s003.csv]

Sampling period	Quadrat	Species	Vertical count (Multiplier)_TL1	No.of sub-quadrat_TL1	Vertical count (Multiplier)_TL2	No.of sub-quadrat_TL2	Vertical count (Multiplier)_TL3	No.of sub-quadrat_TL3	Vertical count (Multiplier)_TL4	No.of sub-quadrat_TL4	Vertical count (Multiplier)_TL5	No.of sub-quadrat_TL5	Vertical count (Multiplier)_TL6	No.of sub-quadrat_TL6	Vertical count (Multiplier)_TL7	No.of sub-quadrat_TL7	Vertical count (Multiplier)_TL8	No.of sub-quadrat_TL8	Vertical count (Multiplier)_TL9	No.of sub-quadrat_TL9
Jan-15	15 meter	Cladophoropsis membranacea	NF	NF	NF	NF	NF	NF	3 (3.0), 1 (0.75)	4	4 (3.0), 2 (0.75)	6	5 (3.0), 1 (0.375)	6	NF	NF	NF	NF	NF	NF
Jan-15	16 meter	Cladophoropsis membranacea	5 (3.0), 1 (0.375)	6	NF	NF	NF	NF	NF	NF	3 (3.0), 1 (0.75)	4	NF	NF	NF	NF	NF	NF	NF	NF
Jan-15	17 meter	Cladophoropsis membranacea	3 (3.0), 1 (0.75)	4	NF	NF	NF	NF	NF	NF	NF	NF	NF	NF	NF	NF	NF	NF	NF	NF
Jan-15	18 meter	Cladophoropsis membranacea	5 (3.0), 4 (0.375)	9	NF	NF	2 (3.0), 2 (1.5)	4	NF	NF	NF	NF	NF	NF	NF	NF	NF	NF	NF	NF
Jan-15	19 meter	Cladophoropsis membranacea	3 (3.0), 1 (1.5)	5	1 (3.0), 2 (1.5)	3	3 (3.0), 4 (0.75)	7	NF	NF	NF	NF	NF	NF	NF	NF	NF	NF	4 (3.0), 1 (1.5)	5
Jan-15	20 meter	Cladophoropsis membranacea	NF	NF	5 (3.0), 1 (0.375)	6	2 (3.0), 5 (0.375)	7	NF	NF	NF	NF	NF	NF	4 (3.0), 3 (0.75)	7	NF	NF	NF	NF
Jan-15	21 meter	Cladophoropsis membranacea	NF	NF	NF	NF	NF	NF	NF	NF	NF	NF	NF	NF	5 (3.0), 1 (0.75)	6	9 (3.0), 2 (0.75)	11	NF	NF
Jan-15	22 meter	Cladophoropsis membranacea	NF	NF	NF	NF	NF	NF	NF	NF	NF	NF	NF	NF	4 (3.00, 2 (0.75)	6	2 (3.0), 2 (0.75)	4	NF	NF
Jan-15	23 meter	Cladophoropsis membranacea	NF	NF	NF	NF	NF	NF	NF	NF	NF	NF	NF	NF	NF	NF	NF	NF	4 (3.0), 2 (0.375)	6
Jan-15	24 meter	Cladophoropsis membranacea	NF	NF	NF	NF	NF	NF	NF	NF	NF	NF	NF	NF	3 (3.0), 1 (0.375)	4	NF	NF	NF	NF
Jan-15	25 meter	Cladophoropsis membranacea	NF	NF	NF	NF	NF	NF	NF	NF	NF	NF	NF	NF	NF	NF	4 (3.0), 1 (0.75)	5	NF	NF
Feb-15	8 meter	Ceratodictyon intricatum	NF	NF	NF	NF	NF	NF	5 (3.0), 3 (0.1875)	8	3 (3.0), 1 (0.75)	4	3 (3.0), 3 (0.75)	6	NF	NF	NF	NF	NF	NF
Feb-15	9 meter	Ceratodictyon intricatum	NF	NF	NF	NF	NF	NF	4 (3.0), 1 (1.5)	5	4 (1.5), 3 (0.75)	7	4 (3.0), 2 (0.375)	6	NF	NF	NF	NF	NF	NF
Feb-15	9 meter	Padina minor	NF	NF	NF	NF	NF	NF	NF	NF	2 (1.5), 1 (0.375)	3	NF	NF	NF	NF	NF	NF	NF	NF
Feb-15	11 meter	Ceratodictyon intricatum	2 (3.0), 2 (0.1875)	4	2 (3.0), 1 (0.1875)	3	5 (1.5)	5	2 (3.0), 1 (1.5)	3	4 (3.0), 5 (0.375)	9	4 (3.0), 1 (1.5)	6	NF	NF	NF	NF	NF	NF
Feb-15	12 meter	Ceratodictyon intricatum	8 (3.0), 1 (0.375)	9	9 (3.0), 3 (0.375)	12	3 (3.0), 1 (0.375)	4	NF	NF	NF	NF	NF	NF	NF	NF	NF	NF	NF	NF
Feb-15	12 meter	Padina minor	NF	NF	2 (3.0), 3 (0.1875)	5	NF	NF	NF	NF	NF	NF	NF	NF	NF	NF	NF	NF	NF	NF
Feb-15	13 meter	Ceratodictyon intricatum	6 (3.0), 3 (0.375)	9	NF	NF	NF	NF	NF	NF	NF	NF	NF	NF	NF	NF	NF	NF	NF	NF
Feb-15	15 meter	Cladophoropsis membranacea	NF	NF	NF	NF	NF	NF	3 (3.0), 1 (0.75)	4	4 (3.0), 1 (1.5)	6	5 (3.0), 2 (0.1875)	7	NF	NF	NF	NF	NF	NF
Feb-15	15 meter	Ceratodictyon intricatum	4 (3.0), 2 (0.1875)	6	5 (3.0), 1 (0.375)	6	4 (3.0), 2 (0.1875)	6	NF	NF	NF	NF	NF	NF	7 (3.0), 3 (0.75)	10	NF	NF	NF	NF
Feb-15	15 meter	Padina minor	NF	NF	1 (3.0), 5 (0.375)	6	NF	NF	NF	NF	NF	NF	NF	NF	NF	NF	NF	NF	NF	NF
Feb-15	16 meter	Cladophoropsis membranacea	4 (3.0), 7 (0.375)	11	NF	NF	7 (3.0), 3 (0.375)	10	5 (3.0), 3 (0.375)	8	3 (3.0), 1 (0.75)	4	3 (3.0), 3 (0.75)	6	NF	NF	NF	NF	NF	NF
Feb-15	16 meter	Ceratodictyon intricatum	NF	NF	NF	NF	NF	NF	NF	NF	NF	NF	NF	NF	6 (3.0), 3 (0.75)	9	4 (3.0)	4	5 (3.0), 2 (0.1875)	7
Feb-15	17 meter	Cladophoropsis membranacea	3 (3.0), 1 (0.375)	4	NF	NF	3 (3.0), 3 (0.75)	6	NF	NF	NF	NF	NF	NF	9 (3.0), 2 (0.75)	11	6 (3.0), 2 (0.75)	8	3 (3.0), 1 (0.75)	4
Feb-15	17 meter	Padina minor	NF	NF	NF	NF			NF	NF	NF	NF	NF	NF	NF	NF	2 (3.0), 3 (0.75)	5	NF	NF
Feb-15	18 meter	Cladophoropsis membranacea	5 (3.0), 4 (0.375)	9	2 (3.0), 3 (0.75)	5	2 (3.0), 5 (0.375)	7	NF	NF	NF	NF	NF	NF	NF	NF	NF	NF	NF	NF
Feb-15	18 meter	Ceratodictyon intricatum	NF	NF	NF	NF	NF	NF	NF	NF	NF	NF	NF	NF	NF	NF	NF	NF	3 (3.0), 1 (0.1875)	4
Feb-15	19 meter	Cladophoropsis membranacea	3 (3.0), 2 (0.375)	5	2 (3.0), 2 (0.1875)	4	2 (3.0), 4 (1.5)	12	NF	NF	NF	NF	NF	NF	NF	NF	NF	NF	3 (3.0), 3 (0.75)	6
Feb-15	20 meter	Cladophoropsis membranacea	NF	NF	5 (3.0), 1 (0.375)	6	6 (1.5)	6	NF	NF	NF	NF	NF	NF	3 (3.0), 2 (1.5), 7 (0.375)	12	NF	NF	6 (3.0), 2 (0.75)	8
Feb-15	20 meter	Ceratodictyon intricatum	NF	NF	NF	NF	NF	NF	NF	NF	NF	NF	NF	NF	NF	NF	3 (3.0), 1 (1.5)	4	NF	NF
Feb-15	21 meter	Cladophoropsis membranacea	NF	NF	NF	NF	NF	NF	NF	NF	NF	NF	NF	NF	5 (3.0), 2 (0.1875)	7	9 (3.0), 2 (0.75)	11	NF	NF
Feb-15	22 meter	Cladophoropsis membranacea	NF	NF	NF	NF	NF	NF	NF	NF	NF	NF	NF	NF	7 (3.0), 2 (0.1875)	9	3 (3.0), 1 (0.375)	4	NF	NF
Feb-15	23 meter	Cladophoropsis membranacea	NF	NF	NF	NF	NF	NF	NF	NF	NF	NF	NF	NF	4 (3.0), 3 (0.75)	7	5 (3.0), 2 (0.75)	7	NF	NF
Feb-15	24 meter	Cladophoropsis membranacea	NF	NF	NF	NF	NF	NF	NF	NF	NF	NF	NF	NF	3 (3.0), 3 (0.75)	6	7 (3.0), 1 (0.75)	8	NF	NF
Feb-15	25 meter	Cladophoropsis membranacea	NF	NF	NF	NF	NF	NF	NF	NF	NF	NF	NF	NF			4 (3.0), 1 (0.75)	5	NF	NF
Mar-15	8 meter	Ceratodictyon intricatum	NF	NF	NF	NF	NF	NF	4 (3.0), 7 (0.375)	11	3 (3.0), 1 (1.5)	4	3 (3.0), 3 (0.375)	6	NF	NF	NF	NF	NF	NF
Mar-15	9 meter	Ceratodictyon intricatum	NF	NF	NF	NF	NF	NF	4 (3.0), 1 (1.5)	6	6 (1.5)	6	4 (3.0), 12 (0.1875)	6	NF	NF	NF	NF	NF	NF
Mar-15	9 meter	Padina minor	NF	NF	NF	NF	NF	NF	NF	NF	2 (3.0), 3 (0.375)	5	NF	NF	NF	NF	NF	NF	NF	NF
Mar-15	11 meter	Ceratodictyon intricatum	NF	NF	2 (3.0), 3 (0.75)	5	3 (3.0), 1 (0.375)	4	NF	NF	NF	NF	NF	NF	NF	NF	NF	NF	NF	NF
Mar-15	12 meter	Ceratodictyon intricatum	7 (3.0), 2 (0.1875)	9	9 (3.0), 2 (0.75)	11	3 (3.0), 1 (0.375)	4	NF	NF	4 (3.0), 1 (1.5)	6	4 (3.0), 1 (1.5)	6	NF	NF	NF	NF	NF	NF
Mar-15	12 meter	Padina minor	NF	NF	3 (3.0), 3 (0.75)	6	NF	NF	NF	NF	NF	NF	2 (3.0), 3 (0.75)	5	NF	NF	NF	NF	NF	NF
Mar-15	13 meter	Ceratodictyon intricatum	5 (3.0), 7 (0.375)	12	NF	NF	NF	NF	NF	NF	NF	NF	NF	NF	NF	NF	NF	NF	NF	NF
Mar-15	15 meter	Cladophoropsis membranacea	NF	NF	NF	NF	NF	NF	2 (3.0), 3 (0.75)	5	3 (3.0), 3 (0.75)	6	5 (3.0), 7 (0.375)	12	NF	NF	NF	NF	NF	NF
Mar-15	15 meter	Ceratodictyon intricatum	4 (3.0), 1 (1.5)	6	5 (3.0), 2 (0.75)	7	4 (3.0), 7 (0.375)	11	NF	NF	NF	NF	NF	NF	7 (3.0), 2 (1.5), 1 (0.375)	10	NF	NF	NF	NF
Mar-15	15 meter	Padina minor	NF	NF	4 (3.0), 4 (0.1875)	8	NF	NF	NF	NF	NF	NF	NF	NF	NF	NF	NF	NF	NF	NF
Mar-15	16 meter	Cladophoropsis membranacea	6 (3.0), 2 (0.75)	8	NF	NF	6 (3.0), 2 (0.75)	8	5 93.0), 1 (0.375)	6	3 (3.0), 1 (0.375)	4	4 (3.0)	4	NF	NF	NF	NF	NF	NF
Mar-15	16 meter	Ceratodictyon intricatum	NF	NF	NF	NF	NF	NF	6 (3.0), 3 (0.75), 3 (0.375)	12	3 (3.0), 3 (0.75)	6	5 (3.0), 1 (0.375)	6	NF	NF	NF	NF	NF	NF
Mar-15	17 meter	Cladophoropsis membranacea	3 (3.0), 1 (0.375)	4	NF	NF	4 (3.0), 2 (0.375)	4	NF	NF	NF	NF	NF	NF	NF	NF	NF	NF	NF	NF
Mar-15	17 meter	Ceratodictyon intricatum	NF	NF	NF	NF	NF	NF	9 (3.0), 2 (0.75)	11	6 (3.0), 2 (0.75)	8	3 (3.0), 1 (0.375)	4	NF	NF	NF	NF	NF	NF
Mar-15	17 meter	Padina minor	NF	NF	NF	NF	NF	NF	NF	NF	3 (3.0), 1 (0.375)	4	NF	NF	NF	NF	NF	NF	NF	NF
Mar-15	18 meter	Cladophoropsis membranacea	5 (3.0), 2 (0.75)	7	3 (3.0), 1 (0.375)	4	3 (3.0), 1 (1.5)	4	NF	NF	NF	NF	NF	NF	NF	NF	NF	NF	NF	NF
Mar-15	18 meter	Ceratodictyon intricatum	NF	NF	NF	NF	NF	NF	NF	NF	NF	NF	4 (3.0),	4	NF	NF	NF	NF	NF	NF
Mar-15	19 meter	Cladophoropsis membranacea	3 (3.0), 1 (1.5)	4	3 (3.0), 1 (1.5)	4	4 (3.0), 5 (0.375)	9	NF	NF	NF	NF	3 (3.0), 3 (0.75)	6	NF	NF	NF	NF	NF	NF
Mar-15	20 meter	Cladophoropsis membranacea	NF	NF	4 (3.0), 3 (0.75)	7	2 (3.0), 3 (0.75)	5	4 (3.0), 3 (0.375), 5 (0.1875)	12	NF	NF	7 (3.0), 3 (0.375)	10	NF	NF	NF	NF	NF	NF
Mar-15	20 meter	Ceratodictyon intricatum	NF	NF	NF	NF	NF	NF	NF	NF	3 (3.0), 1 (1.5)	4	NF	NF	NF	NF	NF	NF	NF	NF
Mar-15	21 meter	Cladophoropsis membranacea	NF	NF	NF	NF	NF	NF	4 (3.0)	6	9 (3.0), 2 (0.75)	11	NF	NF	NF	NF	NF	NF	NF	NF
Mar-15	22 meter	Cladophoropsis membranacea	NF	NF	NF	NF	NF	NF	3 (3.0), 3 (0.75)	6	3 (3.0)	3	NF	NF	NF	NF	NF	NF	NF	NF
Mar-15	23 meter	Cladophoropsis membranacea	NF	NF	NF	NF	NF	NF	5 (3.0), 1 (0.375)	6	5 (3.0), 5 (0.375), 5 (0.1875)	15	4 (3.0), 3 (0.1875)	7	NF	NF	NF	NF	NF	NF
Mar-15	24 meter	Cladophoropsis membranacea	NF	NF	NF	NF	NF	NF	3 (3.0), 1 (0.375)	4	7 (3.0), 1 (1.5)	8	NF	NF	NF	NF	NF	NF	NF	NF
Mar-15	25 meter	Cladophoropsis membranacea	NF	NF	NF	NF	NF	NF	NF	NF	4 (3.0), 1 (0.75)	5	NF	NF	NF	NF	NF	NF	NF	NF
Apr-15	8 meter	Ceratodictyon intricatum	NF	NF	NF	NF	NF	NF	5 (3.0), 1 (0.375)	6	3 (3.0), 1 (1.5)	4	4 (3.0), 1 (0.375)	5	NF	NF	NF	NF	NF	NF
Apr-15	9 meter	Ceratodictyon intricatum	NF	NF	NF	NF	NF	NF	4 (3.0), 1 (.15)	5	1 (3.0), 3 (0.75)	4	4 (3.0), 1 (0.75)	5	NF	NF	NF	NF	NF	NF
Apr-15	9 meter	Padina minor	NF	NF	NF	NF	NF	NF	NF	NF	4 (3.0), 1 (0.75)	5	NF	NF	NF	NF	NF	NF	NF	NF
Apr-15	10 meter	Ceratodictyon intricatum	NF	NF	NF	NF	3 (3.0), 1 (0.75)	4	NF	NF	NF	NF	NF	NF	NF	NF	NF	NF	NF	NF
Apr-15	10 meter	Padina minor	NF	NF	NF	NF	NF	NF	NF	NF	NF	NF	1 (3.0), 1 (0.375)	2	NF	NF	NF	NF	NF	NF
Apr-15	11 meter	Ceratodictyon intricatum	NF	NF	2 (3.0), 2 (0.1875)	4	2 (3.0), 3 (0.75)	5	NF	NF	NF	NF	NF	NF	NF	NF	NF	NF	NF	NF
Apr-15	12 meter	Ceratodictyon intricatum	8 (3.0), 1 (0.75)	9	9 (3.0), 3 (0.375)	12	3 (3.0), 1 (0.75)	4	NF	NF	4 (3.0), 1 (.15)	5	4 (3.0), 1 (.15)	6	NF	NF	NF	NF	NF	NF
Apr-15	12 meter	Padina minor	2 (3.0), 1 (1.5)	3	6 (3.0), 1 (0.75)	7	NF	NF	NF	NF	NF	NF	2 (3.0), 3 (0.75)	5	NF	NF	NF	NF	NF	NF
Apr-15	13 meter	Ceratodictyon intricatum	6 (3.0), 2 (0.375)	8	NF	NF	NF	NF	NF	NF	NF	NF	NF	NF	NF	NF	NF	NF	NF	NF
Apr-15	15 meter	Ceratodictyon intricatum	NF	NF	5 (3.0), 1 (0.375)	6	5 (3.0), 1 (0.375)	6	NF	NF	NF	NF	NF	NF	8 (3.0), 1 (1.5)	10	NF	NF	NF	NF
Apr-15	15 meter	Padina minor	NF	NF	5 (3.0), 1 (0.75)	6	NF	NF	NF	NF	NF	NF	NF	NF	NF	NF	NF	NF	NF	NF
Apr-15	15 meter	Cladophoropsis membranacea	NF	NF	NF	NF	NF	NF	3 (3.0), 1 (0.75)	4	4 (3.0), 1 (.15)	5	5 (3.0), 1 (0.375)	6	NF	NF	NF	NF	NF	NF
Apr-15	16 meter	Cladophoropsis membranacea	5 (3.0), 1 (0.375)	6	NF	NF	7 (3.0)	7	5 (3.0), 1 (0.375)	6	3 (3.0), 1 (0.75)	4	3 (3.0), 1 (0.75)	4	NF	NF	NF	NF	NF	NF
Apr-15	16 meter	Ceratodictyon intricatum	NF	NF	NF	NF	NF	NF	NF	NF	NF	NF	NF	NF	7 (3.0)	7	NF	NF	5 (3.0), 1 (0.75)	6
Apr-15	16 meter	Padina minor	NF	NF	2 (3.0), 3 (0.1875)	5	NF	NF	NF	NF	NF	NF	NF	NF	NF	NF	NF	NF	NF	NF
Apr-15	17 meter	Cladophoropsis membranacea	3 (3.0), 3 (0.75)	6	NF	NF	3 (3.0), 1 (1.5)	4	NF	NF	NF	NF	NF	NF	NF	NF	NF	NF	NF	NF
Apr-15	17 meter	Ceratodictyon intricatum	NF	NF	NF	NF	NF	NF	NF	NF	NF	NF	NF	NF	9 (3.0), 1 (1.5)	10	6 (3.0), 2 (0.75)	8	NF	NF
Apr-15	17 meter	Padina minor	NF	NF	NF	NF	NF	NF	NF	NF	NF	NF	NF	NF	NF	NF	3 (3.0), 3 (0.75)	4	NF	NF
Apr-15	18 meter	Cladophoropsis membranacea	5 (3.0), 2 (0.75)	7	3 (3.0), 1 (0.75)	4	3 (3.0)	3	NF	NF	NF	NF	NF	NF	NF	NF	NF	NF	NF	NF
Apr-15	18 meter	Padina minor	NF	NF	NF	NF	NF	NF	NF	NF	2 (3.0), 2 (0.1875)	4	NF	NF	NF	NF	NF	NF	NF	NF
Apr-15	19 meter	Cladophoropsis membranacea	3 (3.0), 1 (1.5)	4	NF	NF	4 (3.0)	4	NF	NF	NF	NF	NF	NF	NF	NF	NF	NF	4 (3.0), 1 (.15)	5
Apr-15	20 meter	Cladophoropsis membranacea	NF	NF	5 (3.0), 1 (0.375)	6	4 (1.5), 5 (0.375)	9	NF	NF	NF	NF	NF	NF	4 (3.0), 3 (0.75)	7	NF	NF	7 (3.0), 1 (0.75)	8
Apr-15	20 meter	Ceratodictyon intricatum	NF	NF	NF	NF	NF	NF	NF	NF	NF	NF	NF	NF	NF	NF	3 (3.0), 1 (1.5)	4	NF	NF
Apr-15	21 meter	Cladophoropsis membranacea	NF	NF	NF	NF	NF	NF	NF	NF	NF	NF	NF	NF	5 (3.0), 1 (0.375)	7	9 (3.0), 2 (0.75)	11	NF	NF
Apr-15	22 meter	Cladophoropsis membranacea	NF	NF	NF	NF	NF	NF	NF	NF	NF	NF	NF	NF	4 (3.0), 1 (.15)	5	2 (3.0), 2 (0.75)	4	NF	NF
Apr-15	23 meter	Cladophoropsis membranacea	NF	NF	NF	NF	NF	NF	NF	NF	NF	NF	NF	NF	5 (3.0)	5	5 (3.0), 2 (0.75)	7	4 (3.0), 5 (0.375)	9
Apr-15	24 meter	Cladophoropsis membranacea	NF	NF	NF	NF	NF	NF	NF	NF	NF	NF	NF	NF	3 (3.0), 1 (0.75)	4	7 (3.0), 1 (0.75)	8	NF	NF
Apr-15	25 meter	Cladophoropsis membranacea	NF	NF	NF	NF	NF	NF	NF	NF	NF	NF	NF	NF	NF	NF	4 (3.0), 1 (0.75)	5	NF	NF
May-15	7 meter	Sargassum polycystum	NF	NF	NF	NF	4 (3.0), 1 (0.75)	5	NF	NF	NF	NF	NF	NF	NF	NF	NF	NF	NF	NF
May-15	8 meter	Ceratodictyon intricatum	NF	NF	NF	NF	NF	NF	4 (3.0), 1 (0.75)	5	NF	NF	NF	NF	NF	NF	NF	NF	NF	NF
May-15	9 meter	Ceratodictyon intricatum	NF	NF	NF	NF	NF	NF	3 (3.0), 1 (1.5)	4	NF	NF	NF	NF	NF	NF	NF	NF	NF	NF
May-15	9 meter	Padina minor	NF	NF	NF	NF	NF	NF	NF	NF	5 (3.0), 1 (0.375)	6	NF	NF	NF	NF	NF	NF	NF	NF
May-15	9 meter	Padina minor	NF	NF	NF	NF	NF	NF	NF	NF	1 (3.0), 3 (075)	5	1 (3.0), 5 (0.375)	6	NF	NF	NF	NF	NF	NF
May-15	9 meter	Sargassum polycystum	NF	NF	3 (0.75)	3	NF	NF	NF	NF	NF	NF	NF	NF	NF	NF	NF	NF	NF	NF
May-15	9 meter	Padina minor	NF	NF	NF	NF	3 (0.375)	3	NF	NF	2 (3.0), 1 (1.5)	3	NF	NF	NF	NF	NF	NF	NF	NF
May-15	12 meter	Ceratodictyon intricatum	6 (3.0), 2 (0.75)	8	9 (3.0), 2 (0.75)	11	NF	NF	NF	NF	NF	NF	3 (3.0), 1 (0.1875)	4	NF	NF	NF	NF	NF	NF
May-15	12 meter	Padina minor	3 (3.0), 3 (0.75)	6	6 (3.0), 2 (0.75)	8	NF	NF	NF	NF	NF	NF	3 (3.0), 3 (0.75)	6	NF	NF	NF	NF	NF	NF
May-15	12 meter	Sargassum polycystum	NF	NF	3 (3.0), 3 (0.75)	6	NF	NF	NF	NF	NF	NF	NF	NF	NF	NF	NF	NF	NF	NF
May-15	13 meter	Sargassum polycystum	NF	NF	3 (3.0), 1 (0.75)	4	NF	NF	NF	NF	NF	NF	NF	NF	NF	NF	NF	NF	NF	NF
May-15	14 meter	Sargassum paniculatum	NF	NF	NF	NF	NF	NF	NF	NF	3 (3.0), 1 (0.75)	4	NF	NF	NF	NF	NF	NF	NF	NF
May-15	14 meter	Padina minor	NF	NF	NF	NF	NF	NF	NF	NF	NF	NF	3 (3.0), 1 (0.75)	4	1 (3.0), 1 (0375)	2	NF	NF	NF	NF
May-15	14 meter	Sargassum polycystum	NF	NF	2 (1.5), 2 (0.375)	4	NF	NF	NF	NF	3 (1.5)	3	2 (3.0), 3 (0.75)	5	3 (3.0), 1 (1.5)	4	NF	NF	NF	NF
May-15	15 meter	Ceratodictyon intricatum	NF	NF	NF	NF	4 (3.0), 5 (0.375)	9	NF	NF	NF	NF	NF	NF	7 (3.0), 3 (0.75)	10	NF	NF	NF	NF
May-15	15 meter	Sargassum paniculatum	NF	NF	NF	NF	1 (3.0), 1 (1.5), 1 (0.75), 1 (0.1875)	4	NF	NF	NF	NF	NF	NF	NF	NF	NF	NF	NF	NF
May-15	15 meter	Cladophoropsis membranacea	NF	NF	NF	NF	NF	NF	3 (3.0), 1 (0.75)	4	9 (1.5)	9	4 (3.0), 1 (0.75)	5	NF	NF	NF	NF	NF	NF
May-15	16 meter	Cladophoropsis membranacea	6 (3.0), 2 (0.75)	8	NF	NF	9 (3.0), 3 (0.75)	12	5 (3.0), 3 (0.375)	8	3 (3.0), 1 (1.5)	4	3 (3.0), 3 (0.75)	6	NF	NF	NF	NF	NF	NF
May-15	16 meter	Ceratodictyon intricatum	NF	NF	NF	NF	NF	NF	NF	NF	NF	NF	NF	NF	5 (3.0), 3 (0.75)	8	NF	NF	NF	NF
May-15	16 meter	Padina minor	NF	NF	2 (3.0), 1 (1.5)	3	NF	NF	NF	NF	NF	NF	NF	NF	NF	NF	NF	NF	NF	NF
May-15	17 meter	Cladophoropsis membranacea	3 (3.0), 1 (1.5)	4	NF	NF	4 (3.0), 1 (0.75)	5	NF	NF	NF	NF	NF	NF	NF	NF	NF	NF	NF	NF
May-15	17 meter	Ceratodictyon intricatum	NF	NF	NF	NF	NF	NF	NF	NF	NF	NF	NF	NF	8 (3.0), 3 (0.375)	11	6 (3.0), 2 (0.75)	8	NF	NF
May-15	17 meter	Padina minor	NF	NF	NF	NF	NF	NF	NF	NF	NF	NF	NF	NF	NF	NF	3 (3.0), 3 (0.75)	6	NF	NF
May-15	18 meter	Cladophoropsis membranacea	5 (3.0), 4 (0.1875)	9	2 (3.0), 3 (0.75)	5	3 (3.0), 3 (0.75)	6	NF	NF	NF	NF	NF	NF	NF	NF	NF	NF	6 (3.0), 2 (0.75)	8
May-15	18 meter	Padina minor	NF	NF	NF	NF	NF	NF	NF	NF	2 (3.0), 1 (0.375)	3	NF	NF	NF	NF	NF	NF	NF	NF
May-15	19 meter	Cladophoropsis membranacea	3 (3.0), 1 (0.75)	4	NF	NF	2 (1.5), 2 (0.1875)	4	NF	NF	NF	NF	NF	NF	NF	NF	NF	NF	NF	NF
May-15	19 meter	Padina minor	NF	NF	NF	NF	NF	NF	2 (1.5), 1 (0.375)	3	NF	NF	NF	NF	NF	NF	NF	NF	NF	NF
May-15	20 meter	Cladophoropsis membranacea	NF	NF	4 (3.0), 3 (0.75)	7	4 (3.0), 1 (1.5)	6	NF	NF	NF	NF	NF	NF	11 (3.)0), 1 (0.75)	12	NF	NF	7 (3.0), 1 (0.375)	8
May-15	21 meter	Cladophoropsis membranacea	NF	NF	NF	NF	NF	NF	NF	NF	NF	NF	NF	NF	7 (3.0), 3 (0.75)	10	8 (3.0), 3 (1.5)	11	NF	NF
May-15	22 meter	Cladophoropsis membranacea	NF	NF	NF	NF	NF	NF	NF	NF	NF	NF	NF	NF	6 (3.0), 2 (0.75)	8	2 (3.0), 1 (1.5)	3	NF	NF
May-15	23 meter	Cladophoropsis membranacea	NF	NF	NF	NF	NF	NF	NF	NF	NF	NF	NF	NF	5 (3.0), 4 (0.1875)	9	5 (3.0), 2 (0.75)	7	9 (3.0), 2 (0.75)	11
May-15	24 meter	Cladophoropsis membranacea	NF	NF	NF	NF	NF	NF	NF	NF	NF	NF	NF	NF	3 (3.0), 3 (0.75)	6	7 (3.0), 1 (0.75)	8	NF	NF
May-15	25 meter	Cladophoropsis membranacea	NF	NF	NF	NF	NF	NF	NF	NF	NF	NF	NF	NF	NF	NF	4 (3.0), 1 (0.75)	5	NF	NF
Jun-15	7 meter	Sargassum polycystum	NF	NF	NF	NF	6 (3.0), 1 (1.5)	7	NF	NF	NF	NF	NF	NF	NF	NF	NF	NF	NF	NF
Jun-15	8 meter	Sargassum polycystum	NF	NF	NF	NF	3 (3.0), 2 (0.1875)	5	NF	NF	NF	NF	NF	NF	NF	NF	NF	NF	NF	NF
Jun-15	9 meter	Padina minor	NF	NF	NF	NF	NF	NF	NF	NF	5 (3.0), 1 (0.75)	6	NF	NF	NF	NF	NF	NF	NF	NF
Jun-15	10 meter	Padina minor	NF	NF	NF	NF	NF	NF	NF	NF	2 (3.0), 1 (0.75)	3	3 (1.5), 3 (0.375)	6	NF	NF	NF	NF	NF	NF
Jun-15	11 meter	Sargassum paniculatum	NF	NF	1 (3.0), 5 (0.375)	6	NF	NF	NF	NF	NF	NF	NF	NF	NF	NF	NF	NF	NF	NF
Jun-15	11 meter	Padina minor	NF	NF	NF	NF	1 (3.0), 1 (0.375)	2	NF	NF	4 (3.0), 2 (0.375)	6	NF	NF	NF	NF	NF	NF	NF	NF
Jun-15	12 meter	Ceratodictyon intricatum	NF	NF	3 (3.0), 4 (0.375)	7	NF	NF	NF	NF	NF	NF	NF	NF	NF	NF	NF	NF	NF	NF
Jun-15	12 meter	Padina minor	4 (3.0), 4 (0.1875)	8	7 (3.0), 3 (0.75)	10	NF	NF	NF	NF	NF	NF	4 (3.0), 2 (0.1875)	6	NF	NF	NF	NF	NF	NF
Jun-15	12 meter	Sargassum polycystum	NF	NF	3 (3.0), 2 (0.375)	5	NF	NF	NF	NF	NF	NF	NF	NF	NF	NF	NF	NF	NF	NF
Jun-15	13 meter	Sargassum polycystum	NF	NF	4 (3.0), 1 (1.5)	5	NF	NF	NF	NF	3 (3.0), 3 (0.75)	5	NF	NF	NF	NF	NF	NF	NF	NF
Jun-15	13 meter	Padina minor	NF	NF	NF	NF	NF	NF	NF	NF	NF	NF	3 (3.0), 1 (1.5)	4	1 (3.0), 3 (0.75)	4	NF	NF	NF	NF
Jun-15	13 meter	Sargassum paniculatum	NF	NF	NF	NF	NF	NF	NF	NF	4 (3.0), 2 (0.1875)	6	NF	NF	NF	NF	NF	NF	NF	NF
Jun-15	14 meter	Sargassum polycystum	NF	NF	2 (3.0), 5 (0.375)	5	NF	NF	NF	NF	NF	NF	NF	NF	4 (3.0), 2 90.375)	6	NF	NF	NF	NF
Jun-15	14 meter	Sargassum paniculatum	NF	NF	NF	NF	NF	NF	NF	NF	NF	NF	3 (3.0)	3	NF	NF	NF	NF	NF	NF
Jun-15	15 meter	Ceratodictyon intricatum	NF	NF	NF	NF	NF	NF	NF	NF	NF	NF	NF	NF	6 (3.0), 2 (0.375)	8	NF	NF	NF	NF
Jun-15	15 meter	Cladophoropsis membranacea	NF	NF	NF	NF	NF	NF	3 (3.0), 1 (1.5)	4	4 (3.0), 3 (0.375)	7	4 (3.0), 2 (0.1875)	6	NF	NF	NF	NF	NF	NF
Jun-15	16 meter	Cladophoropsis membranacea	7 (3.0), 3 (0.375)	10	NF	NF	10 (3.0), 3 (0.75), 3 (0.375)	16	6 (3.0)	6	3 (3.0), 3 (0.75)	6	4 (3.0), 1 (1.5)	5	NF	NF	NF	NF	NF	NF
Jun-15	16 meter	Sargassum polycystum	NF	NF	NF	NF	NF	NF	NF	NF	NF	NF	NF	NF	NF	NF	3 (3.0), 3 (0.75)	6	NF	NF
Jun-15	16 meter	Padina minor	NF	NF	4 (3.0), 1 (0.75)	5	NF	NF	NF	NF	NF	NF	NF	NF	NF	NF	NF	NF	NF	NF
Jun-15	17 meter	Cladophoropsis membranacea	3 (3.0), 1 (0.75)	4	NF	NF	4 (3.0)	4	NF	NF	NF	NF	NF	NF	NF	NF	NF	NF	NF	NF
Jun-15	17 meter	Sargassum polycystum	NF	NF	2 (3.0), 1 (0.375)	3	NF	NF	NF	NF	NF	NF	NF	NF	NF	NF	NF	NF	NF	NF
Jun-15	17 meter	Padina minor	NF	NF	1 (3.0), 1 (0.75)	2	NF	NF	NF	NF	NF	NF	NF	NF	NF	NF	6 (3.0), 1 (1.5)	7	NF	NF
Jun-15	17 meter	Sargassum paniculatum	NF	NF			NF	NF	NF	NF	NF	NF	NF	NF	1 (3.0), 3 (0.75)	4	NF	NF	NF	NF
Jun-15	18 meter	Cladophoropsis membranacea	4 (3.0), 5 (0.1875)	9	3 (3.0), 1 (0.75)	4	NF	NF	NF	NF	NF	NF	NF	NF	NF	NF	NF	NF	NF	NF
Jun-15	18 meter	Padina minor	NF	NF	NF	NF	NF	NF	NF	NF	4 (3.0), 2 (0.1875)	6	NF	NF	NF	NF	1 (3.0), 3 (0.75)	4	NF	NF
Jun-15	19 meter	Sargassum paniculatum	NF	NF	NF	NF	NF	NF	2 (3.0), 1 (1.5)	3	NF	NF	NF	NF	NF	NF	NF	NF	NF	NF
Jun-15	20 meter	Cladophoropsis membranacea	NF	NF	6 (3.0), 2 (0.75)	8	5 (3.0), 1 (0.75)	6	NF	NF	NF	NF	NF	NF	11 (3.0), 1 (0.375)	12	NF	NF	6 (3.0), 1 (1.5)	8
Jun-15	20 meter	Sargassum paniculatum	NF	NF	NF	NF	NF	NF	3 (3.0), 1 (0.375)	4	NF	NF	NF	NF	NF	NF	NF	NF	NF	NF
Jun-15	21 meter	Cladophoropsis membranacea	NF	NF	NF	NF	NF	NF	NF	NF	NF	NF	NF	NF	8 (3.0), 1 (1.5)	9	7 (3.0),	7	NF	NF
Jun-15	22 meter	Cladophoropsis membranacea	NF	NF	NF	NF	NF	NF	NF	NF	NF	NF	NF	NF	6 (3.0), 2 (0.375)	8	NF	NF	NF	NF
Jun-15	23 meter	Cladophoropsis membranacea	NF	NF	NF	NF	NF	NF	NF	NF	NF	NF	NF	NF	5 (3.0), 3 (0.375)	8	6 (3.0), 1 (1.5)	7	9 (3.0), 3 (0.75)	12
Jun-15	24 meter	Cladophoropsis membranacea	NF	NF	NF	NF	NF	NF	NF	NF	NF	NF	NF	NF	3 (3.0)	9	7 (3.0), 1 (1.5)	8	NF	NF
Jun-15	25 meter	Cladophoropsis membranacea	NF	NF	NF	NF	NF	NF	NF	NF	NF	NF	NF	NF	NF	NF	4 (3.0), 1 (1.5)	5	NF	NF
Jul-15	7 meter	Sargassum polycystum	NF	NF	2 (3.0), 1 (1.5)	3	6 (3.0), 4 (0.1875)	10	NF	NF	NF	NF	NF	NF	NF	NF	NF	NF	NF	NF
Jul-15	8 meter	Sargassum polycystum	NF	NF	NF	NF	3 (3.0), 1 (1.5)	4	NF	NF	NF	NF	NF	NF	NF	NF	NF	NF	NF	NF
Jul-15	9 meter	Padina minor	NF	NF	NF	NF	NF	NF	3 (3.0), 1 (0.375)	4	4 (3.0), 5 (0.375)	9	NF	NF	NF	NF	NF	NF	NF	NF
Jul-15	10 meter	Sargassum polycystum	1 (3.0), 3 (0.75)	4	NF	NF	NF	NF	NF	NF	NF	NF	NF	NF	NF	NF	NF	NF	NF	NF
Jul-15	10 meter	Sargassum paniculatum	2 (3.0), 1 (1.5)	3	NF	NF	NF	NF	NF	NF	NF	NF	NF	NF	NF	NF	NF	NF	NF	NF
Jul-15	10 meter	Padina minor	NF	NF	NF	NF	NF	NF	NF	NF	6 (1.5)	6	2 (3.0), 1 (1.5)	3	NF	NF	NF	NF	NF	NF
Jul-15	11 meter	Sargassum paniculatum	NF	NF	2 (3.0), 3 (0.75)	5	NF	NF	NF	NF	NF	NF	NF	NF	NF	NF	NF	NF	NF	NF
Jul-15	11 meter	Padina minor	NF	NF	NF	NF	1 (3.0), 1 (0.375)	2	NF	NF	3 (3.0), 3 (0.75)	6	NF	NF	NF	NF	NF	NF	NF	NF
Jul-15	12 meter	Padina minor	4 (3.0), 1 0.75)	5	7 (3.0), 3 (0.75)	10	NF	NF	NF	NF	NF	NF	4 (3.0), 1 (0.75)	5	NF	NF	NF	NF	NF	NF
Jul-15	12 meter	Sargassum polycystum	NF	NF	3 (3.0), 3 (0.75)	6	NF	NF	NF	NF	NF	NF	NF	NF	NF	NF	NF	NF	NF	NF
Jul-15	12 meter	Sargassum paniculatum	2 (3.0), 3 (0.75)	5	NF	NF	NF	NF	NF	NF	NF	NF	NF	NF	NF	NF	NF	NF	NF	NF
Jul-15	13 meter	Sargassum polycystum	NF	NF	5 (3.0), 1 (0.375)	6	NF	NF	NF	NF	3 (3.0), 3 (0.75)	6	NF	NF	NF	NF	NF	NF	NF	NF
Jul-15	13 meter	Sargassum paniculatum	NF	NF	NF	NF	2 (3.0), 2 (0.375)	4	NF	NF	4 (3.0), 5 (0.375)	9	NF	NF	NF	NF	NF	NF	NF	NF
Jul-15	13 meter	Padina minor	NF	NF	NF	NF	NF	NF	NF	NF	NF	NF	3 (3.0), 1 (0.75)	4	2 (3.0), 1 (0.75)	3	NF	NF	NF	NF
Jul-15	14 meter	Sargassum polycystum	NF	NF	3 (3.0)	3	NF	NF	NF	NF	NF	NF	NF	NF	4 (3.0), 5 (0.375)	9	NF	NF	NF	NF
Jul-15	14 meter	Sargassum paniculatum	NF	NF	NF	NF	NF	NF	NF	NF	NF	NF	3 (3.0), 1 (1.5)	4	NF	NF	NF	NF	NF	NF
Jul-15	16 meter	Cladophoropsis membranacea	NF	NF	NF	NF	9 (3.0), 3 (0.375)	12	5 (3.0), 3 (0.75)	8	NF	NF	3 (3.0), 1 (0.1875)	4	NF	NF	NF	NF	NF	NF
Jul-15	16 meter	Sargassum polycystum	NF	NF	NF	NF	NF	NF	NF	NF	NF	NF	NF	NF	NF	NF	5 (3.0), 5 (0.375)	10	NF	NF
Jul-15	16 meter	Padina minor	NF	NF	4 (3.0), 1 (1.5)	5	NF	NF	NF	NF	NF	NF	NF	NF	NF	NF	NF	NF	NF	NF
Jul-15	17 meter	Cladophoropsis membranacea	NF	NF	NF	NF	5 (3.0), 1 (0.375)	6	NF	NF	NF	NF	NF	NF	NF	NF	NF	NF	NF	NF
Jul-15	17 meter	Sargassum polycystum	NF	NF	3 (3.0), 1 (0.75)	4	NF	NF	NF	NF	NF	NF	NF	NF	NF	NF	NF	NF	NF	NF
Jul-15	17 meter	Padina minor	NF	NF	2 (3.0), 1 (1.5)	3	NF	NF	NF	NF	NF	NF	NF	NF	NF	NF	6 (3.0), 1 (1.5)	7	NF	NF
Jul-15	17 meter	Sargassum paniculatum	NF	NF	NF	NF	NF	NF	NF	NF	NF	NF	NF	NF	2 (3.0), 3 (0.75)	5	NF	NF	NF	NF
Jul-15	18 meter	Cladophoropsis membranacea	1 (3.0), 3 (0.75)	4	NF	NF	NF	NF	NF	NF	NF	NF	NF	NF	NF	NF	NF	NF	NF	NF
Jul-15	18 meter	Sargassum polycystum	NF	NF	NF	NF	1 (3.0), 3 (0.75)	4	NF	NF	NF	NF	NF	NF	NF	NF	NF	NF	NF	NF
Jul-15	18 meter	Padina minor	NF	NF	NF	NF	NF	NF	NF	NF	3 (3.0), 1 (0.75)	4	NF	NF	NF	NF	3 (1.5), 3 (0.75)	6	NF	NF
Jul-15	19 meter	Cladophoropsis membranacea	NF	NF	NF	NF	NF	NF	NF	NF	NF	NF	NF	NF	NF	NF	NF	NF	6 (3.0)	6
Jul-15	19 meter	Sargassum panculatum	NF	NF	NF	NF	NF	NF	5 (1.5)	5	NF	NF	NF	NF	NF	NF	NF	NF	NF	NF
Jul-15	19 meter	Padina minor	NF	NF	NF	NF	NF	NF	NF	NF	4 (3.0), 1 (0.75)	5	NF	NF	NF	NF	NF	NF	NF	NF
Jul-15	20 meter	Cladophoropsis membranacea	NF	NF	5 (3.0), 3 (0.75)	8	4 (3.0)	4	NF	NF	NF	NF	NF	NF	9 (3.0), 3 (0.75)	12	NF	NF	5 (3.0), 1 (0.375)	6
Jul-15	20 meter	Sargassum paniculatum	NF	NF	NF	NF	NF	NF	3 (3.0)	3	NF	NF	NF	NF	NF	NF	NF	NF	NF	NF
Jul-15	21 meter	Cladophoropsis membranacea	NF	NF	NF	NF	NF	NF	NF	NF	NF	NF	NF	NF	7 (3.0), 2 (0.375)	9	7 (3.0), 3 (0.75)	10	NF	NF
Jul-15	22 meter	Cladophoropsis membranacea	NF	NF	NF	NF	NF	NF	NF	NF	NF	NF	NF	NF	5 (3.0), 1 (0.375)	6	NF	NF	NF	NF
Jul-15	23 meter	Cladophoropsis membranacea	NF	NF	NF	NF	NF	NF	NF	NF	NF	NF	NF	NF	3 (3.0), 2 (1.5)	5	5 (3.0), 3 (0.75)	8	9 (3.0), 3 (0.75)	12
Aug-15	16 meter	Cladophoropsis membranacea	5 (3.0), 3 90.75)	8	NF	NF	3 (3.0), 3 (0.75)	6	NF	NF	NF	NF	NF	NF	NF	NF	NF	NF	NF	NF
Aug-15	20 meter	Cladophoropsis membranacea	NF	NF	NF	NF	NF	NF	NF	NF	NF	NF	NF	NF	3 (3.0), 3 (0.75)	6	NF	NF	NF	NF
Aug-15	21 meter	Cladophoropsis membranacea	NF	NF	NF	NF	NF	NF	NF	NF	NF	NF	NF	NF	3 (3.0), 1 (0.75)	4	3 (3.0), 3 (0.75)	6	NF	NF
Aug-15	23 meter	Cladophoropsis membranacea	NF	NF	NF	NF	NF	NF	NF	NF	NF	NF	NF	NF	NF	NF	NF	NF	3 (3.0), 1 (0.75)	4
Jan-16	16 meter	Cladophoropsis membranacea	3 (1.5)	3	NF	NF	3 (0.375)	3	NF	NF	NF	NF	NF	NF	NF	NF	NF	NF	NF	NF
Jan-16	19 meter	Cladophoropsis membranacea	NF	NF	3 (0.75)	3	NF	NF	NF	NF	NF	NF	NF	NF	NF	NF	NF	NF	NF	NF
Feb-16	16 meter	Cladophoropsis membranacea	5 (3.0), 3 (0.75)	8	NF	NF	3 (3.0), 3 (0.75)	6	NF	NF	NF	NF	NF	NF	NF	NF	NF	NF	NF	NF
Feb-16	18 meter	Cladophoropsis membranacea	NF	NF	NF	NF	3 (3.0), 3 (0.75)	6	NF	NF	NF	NF	NF	NF	NF	NF	NF	NF	NF	NF
Feb-16	19 meter	Cladophoropsis membranacea	NF	NF	1 (3.0), 2 (0.1875)	3	NF	NF	NF	NF	NF	NF	NF	NF	NF	NF	NF	NF	NF	NF
Feb-16	20 meter	Cladophoropsis membranacea	NF	NF	NF	NF	NF	NF	NF	NF	3 (3.0), 1 (0.75)	4	NF	NF	NF	NF	NF	NF	NF	NF
Feb-16	20 meter	Ceratodictyon intricatum	NF	NF	NF	NF	NF	NF	NF	NF	2 (3.0), 2 (0.1875)	4	NF	NF	NF	NF	NF	NF	NF	NF
Feb-16	20 meter	Padina minor	NF	NF	NF	NF	NF	NF	NF	NF	NF	NF	NF	NF	NF	NF	NF	NF	1 (3.0), 2 (0.1875)	3
Feb-16	21 meter	Cladophoropsis membranacea	NF	NF	NF	NF	NF	NF	NF	NF	NF	NF	NF	NF	2 (3.0), 3 (0.75)	5	6 (1.5), 3 (0.1875)	9	NF	NF
Feb-16	21 meter	Ceratodictyon intricatum	2 (3.0), 2 (0.1875)	4	NF	NF	5 (1.5)	5	NF	NF	NF	NF	NF	NF	NF	NF	NF	NF	NF	NF
