# Supplementary material for: Spatial and temporal distribution dataset of benthic macroalgae during the 2015-2016 tropical monsoonal cycle in Malaysia
Source: Biodivers Data J. 2022 Jul 26;10:e85676. doi: 10.3897/BDJ.10.e85676 (PMC9848546; doi:10.3897/BDJ.10.e85676)
Supplement: Supplementary material 4 — Raw data of cover and frequency of macroalgae recorded at Telok Gorek [file bdj-10-e85676-s004.csv]

Sampling period	Quadrat	Species	Vertical count (Multiplier)_TL1	No.of sub-quadrat_TL1	Vertical count (Multiplier)_TL2	No.of sub-quadrat_TL2	Vertical count (Multiplier)_TL3	No.of sub-quadrat_TL3	Vertical count (Multiplier)_TL4	No.of sub-quadrat_TL4	Vertical count (Multiplier)_TL5	No.of sub-quadrat_TL5	Vertical count (Multiplier)_TL6	No.of sub-quadrat_TL6	Vertical count (Multiplier)_TL7	No.of sub-quadrat_TL7	Vertical count (Multiplier)_TL8	No.of sub-quadrat_TL8	Vertical count (Multiplier)_TL9	No.of sub-quadrat_TL9
Jan-15	5 meter	Chaetomorpha spp.	NF	NF	NF	NF	NF	NF	5 (1.5)	5	1 (3.0), 2 (1.5), 4 (0.75)	7	NF	NF	NF	NF	NF	NF	NF	NF
Jan-15	6 meter	Chaetomorpha spp.	1 (0.75), 2 (0.375)	3	NF	NF	NF	NF	NF	NF	NF	NF	NF	NF	NF	NF	NF	NF	NF	NF
Jan-15	8 meter	Cladophoropsis membranacea	NF	NF	2 (3.0), 3 (1.5), 1 (0.75), 1 (0.375)	7	NF	NF	NF	NF	NF	NF	NF	NF	NF	NF	NF	NF	NF	NF
Jan-15	8 meter	Chaetomorpha spp.	NF	NF			NF	NF	NF	NF	NF	NF	1 (1.5), 3 (0.75)	4	NF	NF	NF	NF	NF	NF
Jan-15	9 meter	Cladophoropsis membranacea	NF	NF	6 (3.0), 1 (1.5), 1 (0.75)	8	NF	NF	NF	NF	NF	NF	NF	NF	NF	NF	NF	NF	NF	NF
Jan-15	9 meter	Chaetomorpha spp.	NF	NF	NF	NF	NF	NF	NF	NF	NF	NF	4 (0.1875)	4	NF	NF	NF	NF	NF	NF
Jan-15	10 meter	Cladophoropsis membranacea	6 (3.0), 3 (0.75)	9	NF	NF	8 (3.0), 3 (1.5), 1 (0.75)	12	NF	NF	NF	NF	NF	NF	NF	NF	NF	NF	NF	NF
Jan-15	10 meter	Chaetomorpha spp.	NF	NF	NF	NF	NF	NF	NF	NF	NF	NF	1 (0.75), 2 (0.375)	3	NF	NF	NF	NF	NF	NF
Jan-15	11 meter	Cladophoropsis membranacea	5 (3.0), 3 (0.75)	8	3 (3.0), 4 (0.375)	7	NF	NF	NF	NF	NF	NF	NF	NF	NF	NF	NF	NF	NF	NF
Jan-15	12 meter	Chaetomorpha spp.	NF	NF	NF	NF	NF	NF	NF	NF	NF	NF	NF	NF	9 (3.0), 3 (1.5)	12	NF	NF	NF	NF
Jan-15	13 meter	Cladophoropsis membranacea	5 (3.0), 3 (0.375)	8	2 (3.0), 5 (0.75)	7	9 (3.0), 3 (0.75)	12	NF	NF	NF	NF	NF	NF	NF	NF	NF	NF	NF	NF
Jan-15	13 meter	Chaetomorpha spp.	NF	NF	NF	NF	NF	NF	NF	NF	1 (3.0). 1 (0.75)	2	NF	NF	NF	NF	NF	NF	NF	NF
Jan-15	14 meter	Cladophoropsis membranacea	6 (3.0), 1 (1.5), 3 (2.25)	10	NF	NF	8 (3.0), 2 (1.5), 1 (0.75)	10	NF	NF	NF	NF	NF	NF	9 (3.0), 1 (1.5), 1 (0.75)	11	NF	NF	3 (1.5), 1 (0.75), 1 (0.375)	5
Jan-15	15 meter	Cladophoropsis membranacea	NF	NF	NF	NF	5 (3.0), 2 (1.5), 1 (0.75)	8	NF	NF	NF	NF	NF	NF	NF	NF	4 (3.0), 2 (0.375)	6	2 (3.0), 1 (1.5), 3 (0.75)	6
Jan-15	15 meter	Chaetomorpha spp.	NF	NF	NF	NF	NF	NF	4 (3.0), 4 (1.5), 4 (0.75)	12	NF	NF	NF	NF	NF	NF	NF	NF	NF	NF
Jan-15	16 meter	Cladophoropsis membranacea	NF	NF	8 (3.0), 3 (1.5), 1 (0.75)	12	NF	NF	NF	NF	NF	NF	NF	NF	NF	NF	3 (3.0), 1 (1.5), 1 (0.75)	6	NF	NF
Jan-15	17 meter	Cladophoropsis membranacea	NF	NF	8 (3.0), 2 (1.5), 1 (0.75)	12	NF	NF	NF	NF	NF	NF	NF	NF	6 (3.0), 2 (0.375)	8	NF	NF	3 (0.75), 1 (0.1875)	4
Jan-15	17 meter	Chaetomorpha spp.	NF	NF	NF	NF	NF	NF	NF	NF	NF	NF	6 (3.0), 1 (1.5)	7	NF	NF	NF	NF	NF	NF
Jan-15	18 meter	Cladophoropsis membranacea	8 (3.0), 3 (1.5), 1 (0.75)	12	NF	NF	NF	NF	NF	NF	NF	NF	NF	NF	5 (3.0), 3 (0.75)	8	3 (1.5), 1 (0.75)	3	NF	NF
Jan-15	19 meter	Cladophoropsis membranacea	NF	NF	4 (3.0), 2 (0.75)	6	2 (3.0), 5 (0.75)	7	NF	NF	NF	NF	NF	NF	3 (1.5), 1 (0.75)	4	NF	NF	3 (3.0), 1 (0.75)	4
Jan-15	20 meter	Chaetomorpha spp.	NF	NF	1 (3.0), 3 (1.5)	4	NF	NF	NF	NF	NF	NF	NF	NF	NF	NF	NF	NF	NF	NF
Jan-15	21 meter	Cladophoropsis membranacea	NF	NF	NF	NF	1 (0.75), 2 (0.375)	3	NF	NF	NF	NF	NF	NF	NF	NF	NF	NF	NF	NF
Jan-15	24 meter	Chaetomorpha spp.	5 (1.5), 4 (0.1875)	9	NF	NF	NF	NF	NF	NF	NF	NF	NF	NF	NF	NF	NF	NF	NF	NF
Feb-15	5 meter	Chaetomorpha spp.	NF	NF	NF	NF	NF	NF	5 (1.5)	5	6 (1.5), 1 (0.75)	7	NF	NF	NF	NF	NF	NF	NF	NF
Feb-15	6 meter	Chaetomorpha spp.	1 (1.5), 3 (0.375)	4	NF	NF	NF	NF	NF	NF	NF	NF	NF	NF	NF	NF	NF	NF	NF	NF
Feb-15	8 meter	Cladophoropsis membranacea	NF	NF	4 (3.0), 1 (1.5), 1 (0.75)	7	2 (1.5), 4 (0.375)	6	NF	NF	NF	NF	NF	NF	NF	NF	NF	NF	NF	NF
Feb-15	8 meter	Canistrocarpus cervicornis	NF	NF	3 (0.75)	3	NF	NF	NF	NF	NF	NF	NF	NF	NF	NF	NF	NF	NF	NF
Feb-15	8 meter	Chaetomorpha spp.	NF	NF	NF	NF	NF	NF	NF	NF	NF	NF	5 (1.5)	5	NF	NF	NF	NF	NF	NF
Feb-15	9 meter	Cladophoropsis membranacea	NF	NF	7 (3.0), 1 (0.75)	8	NF	NF	NF	NF	NF	NF	NF	NF	NF	NF	NF	NF	NF	NF
Feb-15	9 meter	Chaetomorpha spp.	NF	NF	NF	NF	NF	NF	NF	NF	NF	NF	3 (0.75)	3	NF	NF	NF	NF	NF	NF
Feb-15	10 meter	Cladophoropsis membranacea	7 (3.0), 2 ( 0.75)	9	NF	NF	10 (3.0), 2 (0.75)	12	NF	NF	NF	NF	NF	NF	NF	NF	NF	NF	NF	NF
Feb-15	10 meter	Chaetomorpha spp.	NF	NF	NF	NF	NF	NF	NF	NF	NF	NF	3 (0.375)	3	NF	NF	NF	NF	NF	NF
Feb-15	11 meter	Cladophoropsis membranacea	6 (3.0), 2 (0.75)	8	2 (3.0), 1 (1.5), 4 (0.75)	7	NF	NF	NF	NF	NF	NF	NF	NF	NF	NF	NF	NF	NF	NF
Feb-15	12 meter	Cladophoropsis membranacea	NF	NF	NF	NF	NF	NF	NF	NF	NF	NF	NF	NF	10 (3.0), 5 (0.75)	15	NF	NF	NF	NF
Feb-15	13 meter	Cladophoropsis membranacea	5 (3.0), 3 (1.5)	8	3 (3.0), 1 (1.5), 2 (0.375)	6	9 (3.0), 1 (1.5), 1 (0.75), 1 (0.375)	12	NF	NF	NF	NF	NF	NF	NF	NF	NF	NF	NF	NF
Feb-15	13 meter	Chaetomorpha spp.	NF	NF	NF	NF	NF	NF	3 (0.75)	3	3 (1.5), 2 (0.75)	5	NF	NF	NF	NF	NF	NF	NF	NF
Feb-15	14 meter	Cladophoropsis membranacea	6 (3.0), 3 (1.5), 1 (0.75)	10	NF	NF	9 (3.0), 1 (1.5)	10	NF	NF	NF	NF	NF	NF	9 (3.0), 1 (1.5)	10	NF	NF	3 (3.0), 1 (1.5)	4
Feb-15	14 meter	Canistrocarpus cervicornis	NF	NF	1 (3.0), 1 (0.75)	2	NF	NF	NF	NF	NF	NF	NF	NF	NF	NF	NF	NF	2 (1.5), 3 (0.75)	5
Feb-15	15 meter	Cladophoropsis membranacea	NF	NF	NF	NF	5 (3.0), 3 (1.5)	8	NF	NF	NF	NF	NF	NF	NF	NF	2 (3.0), 6 (0.75)	8	3 (3.0), 2 (0.1875)	5
Feb-15	15 meter	Chaetomorpha spp.	NF	NF	NF	NF	NF	NF	13 (1.5)	13	NF	NF	NF	NF	NF	NF	NF	NF	NF	NF
Feb-15	15 meter	Canistrocarpus cervicornis	NF	NF	NF	NF	NF	NF	NF	NF	NF	NF	NF	NF	1 (3.0), 1 (0.75)	2	NF	NF	NF	NF
Feb-15	16 meter	Cladophoropsis membranacea	NF	NF	10 (3.0), 3 (0.375)	12	NF	NF	NF	NF	NF	NF	NF	NF	NF	NF	3 (3.0), 2 (0.1875)	5	NF	NF
Feb-15	17 meter	Cladophoropsis membranacea	NF	NF	9 (3.0), 3 (0.75)	12	NF	NF	NF	NF	NF	NF	NF	NF	6 (3.0), 2 (0.375)	8	NF	NF	1 (3.0), 3 (1.5)	4
Feb-15	17 meter	Chaetomorpha spp.	NF	NF	NF	NF	NF	NF	NF	NF	NF	NF	6 (3.0), 3 (1.5)	7	NF	NF	NF	NF	NF	NF
Feb-15	17 meter	Canistrocarpus cervicornis	NF	NF	NF	NF	NF	NF	NF	NF	NF	NF	NF	NF	NF	NF	NF	NF	1 (3.0), 2 (0.1875)	3
Feb-15	18 meter	Cladophoropsis membranacea	9 (3.0), 3 (0.75)	12	NF	NF	5 (0.75), 3 (0.1875)	8	NF	NF	NF	NF	NF	NF	5 (3.0), 1 (0.75)	8	1 (3.0), 3 (0.75)	3	NF	NF
Feb-15	18 meter	Canistrocarpus cervicornis	2 (3.0), 1 (1.5)	3	NF	NF	NF	NF	NF	NF	NF	NF	NF	NF	NF	NF	NF	NF	NF	NF
Feb-15	19 meter	Cladophoropsis membranacea	NF	NF	3 (3.0), 1 (1.5), 3 (0.375)	7	6 (1.5), 1 (0.75)	7	NF	NF	NF	NF	NF	NF	1 (3.0), 3 (4.5)	4	NF	NF	1 (3.0), 3 (0.75)	4
Feb-15	20 meter	Chaetomorpha spp.	NF	NF	3 (3.0), 1 (0.75)	4	NF	NF	NF	NF	NF	NF	NF	NF	NF	NF	NF	NF	NF	NF
Feb-15	20 meter	Chaetomorpha spp.	NF	NF	NF	NF	NF	NF	NF	NF	3 (0.375)	3	NF	NF	NF	NF	NF	NF	NF	NF
Feb-15	21 meter	Chaetomorpha spp.	NF	NF	NF	NF	3 (1.5)	3	NF	NF	NF	NF	NF	NF	NF	NF	NF	NF	NF	NF
Feb-15	22 meter	Chaetomorpha spp.	3 (1.5)	3	NF	NF	NF	NF	NF	NF	NF	NF	NF	NF	NF	NF	NF	NF	NF	NF
Feb-15	24 meter	Chaetomorpha spp.	2 (3.0), 6 (0.375)	8	NF	NF	NF	NF	NF	NF	NF	NF	NF	NF	NF	NF	NF	NF	NF	NF
Mar-15	5 meter	Chaetomorpha spp.	1 (3.0), 1 (0.375)	3	NF	NF	NF	NF	NF	NF	NF	NF	NF	NF	NF	NF	NF	NF	NF	NF
Mar-15	8 meter	Cladophoropsis membranacea	NF	NF	3 (3.0), 2 (0.375)	7	5 (1.5)	5	NF	NF	NF	NF	NF	NF	NF	NF	NF	NF	NF	NF
Mar-15	8 meter	Canistrocarpus cervicornis	NF	NF	1 (3.0), 3 (0.75)	4	NF	NF	NF	NF	NF	NF	NF	NF	NF	NF	NF	NF	NF	NF
Mar-15	8 meter	Chaetomorpha spp.	NF	NF	NF	NF	NF	NF	NF	NF	NF	NF	1 (3.0), 3 (1.5)	4	NF	NF	NF	NF	NF	NF
Mar-15	9 meter	Cladophoropsis membranacea	NF	NF	7 (3.0), 3 (0.375)	10	NF	NF	NF	NF	NF	NF	NF	NF	NF	NF	NF	NF	NF	NF
Mar-15	9 meter	Chaetomorpha spp.	NF	NF	NF	NF	NF	NF	NF	NF	NF	NF	2 (1.5), 3 (0.375)	5	NF	NF	NF	NF	NF	NF
Mar-15	10 meter	Cladophoropsis membranacea	6 (3.0), 2 (0.75)	8	NF	NF	10 (3.0), 1 (1.5), 1 (0.75)	12	NF	NF	NF	NF	NF	NF	NF	NF	NF	NF	NF	NF
Mar-15	10 meter	Canistrocarpus cervicornis	NF	NF	NF	NF	1 (3.0), 2 (0.375)	3	NF	NF	NF	NF	NF	NF	NF	NF	NF	NF	NF	NF
Mar-15	10 meter	Chaetomorpha spp.	NF	NF	NF	NF	NF	NF	NF	NF	NF	NF	1 (3.0), 1 (0.375)	3	NF	NF	NF	NF	NF	NF
Mar-15	11 meter	Cladophoropsis membranacea	6 (3.0), 2 (0.75)	8	3 (3.0), 4 (0.75)	7	NF	NF	NF	NF	NF	NF	NF	NF	NF	NF	NF	NF	NF	NF
Mar-15	11 meter	Canistrocarpus cervicornis	1 (1.5), 1 (0.75)	2	NF	NF	NF	NF	NF	NF	NF	NF	NF	NF	NF	NF	NF	NF	NF	NF
Mar-15	12 meter	Cladophoropsis membranacea	NF	NF	NF	NF	NF	NF	NF	NF	NF	NF	NF	NF	11 (3.0), 1 (0.75)	12	NF	NF	NF	NF
Mar-15	13 meter	Cladophoropsis membranacea	4 (3.0), 5 (0.75)	9	3 (3.0), 4 (0.375)	7	8 (3.0), 7 (0.75)	15	NF	NF	NF	NF	NF	NF	NF	NF	NF	NF	NF	NF
Mar-15	13 meter	Canistrocarpus cervicornis	NF	NF	NF	NF	2 (1.5), 6 (0.75)	8	NF	NF	NF	NF	NF	NF	NF	NF	NF	NF	NF	NF
Mar-15	13 meter	Chaetomorpha spp.	NF	NF	NF	NF	NF	NF	3 (0.375)	3	1 (3.0), 2 (0.375)	3	NF	NF	NF	NF	NF	NF	NF	NF
Mar-15	13 meter	Jania adhaerens	NF	NF	NF	NF	NF	NF	NF	NF	NF	NF	NF	NF	NF	NF	3 (0.75)	3	NF	NF
Mar-15	14 meter	Cladophoropsis membranacea	7 (3.0), 3 (0.375)	10	NF	NF	8 (3.0), 3 (1.5)	11	NF	NF	NF	NF	NF	NF	8 (3.0), 1 (1.5), 4 (0.75)	13	NF	NF	3 (3.0), 3 (0.375)	6
Mar-15	14 meter	Canistrocarpus cervicornis	NF	NF	1 (3.0), 2 (0.375)	3	NF	NF	NF	NF	NF	NF	NF	NF	NF	NF	NF	NF	2 (1.5), 6 (0.75)	8
Mar-15	15 meter	Cladophoropsis membranacea	NF	NF	NF	NF	5 (3.0), 3 (0.75)	8	NF	NF	NF	NF	NF	NF	NF	NF	6 (3.0), 1 (0.75)	7	2 (3.0), 3 (0.75)	5
Mar-15	15 meter	Canistrocarpus cervicornis	NF	NF	NF	NF	3 (0.75)	3	NF	NF	NF	NF	NF	NF	1 (3.0), 1 (0.375)	3	NF	NF	NF	NF
Mar-15	15 meter	Chaetomorpha spp.	NF	NF	NF	NF	NF	NF	5 (3.0), 3 (0.75)	8	NF	NF	NF	NF	NF	NF	NF	NF	NF	NF
Mar-15	16 meter	Cladophoropsis membranacea	NF	NF	10 (3.0), 3 (0.375)	12	NF	NF	NF	NF	NF	NF	NF	NF	NF	NF	2 (1.5), 6 (0.75)	8	NF	NF
Mar-15	17 meter	Cladophoropsis membranacea	NF	NF	8 (3.0), 4 (0.75)	12	NF	NF	NF	NF	NF	NF	NF	NF	5 (3.0), 3 (0.75)	8	NF	NF	6 (3.0), 1 (0.75)	7
Mar-15	17 meter	Sargassum polycystum	NF	NF	NF	NF	2 (3.0), 5 (0.75)	7	NF	NF	NF	NF	NF	NF	NF	NF	NF	NF	NF	NF
Mar-15	17 meter	Chaetomorpha spp.	NF	NF	NF	NF	NF	NF	NF	NF	NF	NF	6 (3.0), 1 (1.5)	7	NF	NF	NF	NF	NF	NF
Mar-15	17 meter	Canistrocarpus cervicornis	NF	NF	NF	NF	NF	NF	NF	NF	NF	NF	NF	NF	NF	NF	NF	NF	2 (1.5), 6 (0.75)	8
Mar-15	18 meter	Cladophoropsis membranacea	8 (3.0), 1 (1.5), 4 (0.75)	13	NF	NF	5 (0.75), 4 (0.375)	9	NF	NF	NF	NF	NF	NF	4 (3.0), 3 (0.75), 1 (0.375)	8	2 (3.0), 1 (0.75)	3	NF	NF
Mar-15	18 meter	Canistrocarpus cervicornis	2 (3.0), 1 (0.75)	3	NF	NF	NF	NF	NF	NF	NF	NF	NF	NF	NF	NF	NF	NF	NF	NF
Mar-15	18 meter	Chaetomorpha spp.	NF	NF	NF	NF	NF	NF	NF	NF	NF	NF	3 (0.375)	3	NF	NF	NF	NF	NF	NF
Mar-15	19 meter	Cladophoropsis membranacea	NF	NF	3 (3.0), 3 (0.75), 1 (0.1875)	7	6 (3.0), 1 (0.75)	7	NF	NF	NF	NF	NF	NF	6 (3.0), 1 (0.75)	7	NF	NF	2 (3.0), 2 (0.75)	4
Mar-15	19 meter	Chaetomorpha spp.	NF	NF	1 (3.0), 3 (1.5)	4	NF	NF	NF	NF	NF	NF	NF	NF	NF	NF	NF	NF	NF	NF
Mar-15	20 meter	Chaetomorpha spp.	NF	NF	NF	NF	1 (3.0), 2 (0.75)	3	NF	NF	NF	NF	NF	NF	NF	NF	NF	NF	NF	NF
Mar-15	24 meter	Chaetomorpha spp.	2 (3.0), 4 (0.375)	6	NF	NF	NF	NF	NF	NF	NF	NF	NF	NF	NF	NF	NF	NF	NF	NF
Apr-15	5 meter	Chaetomorpha spp.	NF	NF	NF	NF	NF	NF	3 (1.5), 9 (0.375)	12	3 (3.0), 4 (0.375)	7	NF	NF	NF	NF	NF	NF	NF	NF
Apr-15	6 meter	Chaetomorpha spp.	1 (3.0), 2 (0.1875)	3	NF	NF	NF	NF	NF	NF	NF	NF	NF	NF	NF	NF	NF	NF	NF	NF
Apr-15	7 meter	Padina australis	NF	NF	NF	NF	NF	NF	NF	NF	2 (1.5), 1 (0.375)	3	NF	NF	NF	NF	NF	NF	NF	NF
Apr-15	8 meter	Cladophoropsis membranacea	NF	NF	5 (3.0), 2 (0.375)	7	2 (3.0), 3 (0.375)	5	NF	NF	NF	NF	NF	NF	NF	NF	NF	NF	NF	NF
Apr-15	8 meter	Canistrocarpus cervicornis	NF	NF	3 (0.75)	3	NF	NF	NF	NF	NF	NF	NF	NF	NF	NF	NF	NF	NF	NF
Apr-15	8 meter	Padina australis	NF	NF	NF	NF	NF	NF	2 (3.0), 2 (0.75)	4	NF	NF	NF	NF	NF	NF	NF	NF	NF	NF
Apr-15	8 meter	Chaetomorpha spp.	NF	NF	NF	NF	NF	NF	2 (1.5), 6 (0.75)	8	NF	NF	NF	NF	NF	NF	NF	NF	NF	NF
Apr-15	9 meter	Cladophoropsis membranacea	NF	NF	7 (3.0), 3 (0.375)	10	NF	NF	NF	NF	NF	NF	NF	NF	NF	NF	NF	NF	NF	NF
Apr-15	9 meter	Chaetomorpha spp.	NF	NF	NF	NF	NF	NF	NF	NF	NF	NF	1 (1.5), 7 (0.375)	8	NF	NF	NF	NF	NF	NF
Apr-15	10 meter	Cladophoropsis membranacea	6 (3.0), 2 (0.75)	8	NF	NF	10 (3.0), 3 (0.75),	13	NF	NF	NF	NF	NF	NF	NF	NF	NF	NF	NF	NF
Apr-15	10 meter	Canistrocarpus cervicornis	NF	NF	NF	NF	1 (3.0), 2 (0.1875)	3	NF	NF	NF	NF	NF	NF	NF	NF	NF	NF	NF	NF
Apr-15	10 meter	Chaetomorpha spp.	NF	NF	NF	NF	NF	NF	NF	NF	NF	NF	1 (3.0), 2 (0.375)	3	NF	NF	NF	NF	NF	NF
Apr-15	11 meter	Cladophoropsis membranacea	6 (3.0), 2 (0.75)	8	6 (1.5), 1 (0.75)	7	NF	NF	NF	NF	NF	NF	NF	NF	NF	NF	NF	NF	NF	NF
Apr-15	11 meter	Canistrocarpus cervicornis	1 (1.5), 1 (0.75)	2	NF	NF	NF	NF	NF	NF	NF	NF	NF	NF	NF	NF	NF	NF	NF	NF
Apr-15	12 meter	Cladophoropsis membranacea	NF	NF	NF	NF	NF	NF	NF	NF	NF	NF	NF	NF	11 (3.0), 1 (0.75)	12	NF	NF	NF	NF
Apr-15	12 meter	Padina australis	NF	NF	1 (3.0), 1 (0.375)	2	NF	NF	NF	NF	NF	NF	3 (1.5), 1 (0.75), 1 (0.375)	5	NF	NF	NF	NF	NF	NF
Apr-15	13 meter	Cladophoropsis membranacea	4 (3.0), 5 (0.75)	9	3 (3.0), 4 (0.375)	7	8 (3.0), 1 (1.5), 5 (0.75)	14	NF	NF	NF	NF	NF	NF	NF	NF	NF	NF	NF	NF
Apr-15	13 meter	Canistrocarpus cervicornis	NF	NF	NF	NF	2 (3.0)	2	NF	NF	NF	NF	NF	NF	NF	NF	NF	NF	NF	NF
Apr-15	13 meter	Chaetomorpha spp.	NF	NF	NF	NF	NF	NF	3 (0.375)	3	2 (1.5), 5 (0.375)	7	NF	NF	NF	NF	NF	NF	NF	NF
Apr-15	14 meter	Cladophoropsis membranacea	7 (3.0), 3 (0.375)	10	NF	NF	8 (3.0), 1 (1.5), 4 (0.75)	13	NF	NF	NF	NF	NF	NF	9 (3.0), 5 (0.375)	14	NF	NF	3 (3.0), 3 (0.375)	5
Apr-15	14 meter	Canistrocarpus cervicornis	NF	NF	5 (0.75), 1 (0.375)	6	NF	NF	NF	NF	NF	NF	NF	NF	NF	NF	NF	NF	2 (3.0), 1 (1.5)	3
Apr-15	15 meter	Cladophoropsis membranacea	NF	NF	NF	NF	5 (3.0), 3 (0.75)	8	NF	NF	NF	NF	NF	NF	NF	NF	3 (3.0), 4 (0.1875)	7	2 (3.0), 3 (0.75)	5
Apr-15	15 meter	Sargassum polycystum	1 (3.0), 1 (0.375)	3	NF	NF	NF	NF	NF	NF	NF	NF	NF	NF	NF	NF	NF	NF	NF	NF
Apr-15	15 meter	Canistrocarpus cervicornis	NF	NF	NF	NF	1 (1.5), 1 (0.75)	7	NF	NF	NF	NF	NF	NF	1 (3.0), 1 (0.375)	2	NF	NF	NF	NF
Apr-15	15 meter	Chaetomorpha spp.	NF	NF	NF	NF	NF	NF	6 (1.5), 11 (0.75)	17	NF	NF	NF	NF	NF	NF	NF	NF	NF	NF
Apr-15	15 meter	Sargassum polycystum	NF	NF	NF	NF	NF	NF	NF	NF	3 (0.75)	3	NF	NF	NF	NF	NF	NF	NF	NF
Apr-15	16 meter	Cladophoropsis membranacea	NF	NF	10 (3.0), 2 (0.75)	12	NF	NF	NF	NF	NF	NF	NF	NF	NF	NF	2 (3.0), 3 (0.375)	5	NF	NF
Apr-15	17 meter	Cladophoropsis membranacea	NF	NF	9 (3.0), 3 (0.75)	12	NF	NF	NF	NF	NF	NF	NF	NF	5 (3.0), 3 (0.75)	8	NF	NF	3 (3.0), 2 (0.1875)	5
Apr-15	17 meter	Sargassum polycystum	NF	NF	NF	NF	2 (3.0), 5 (0.75)	7	NF	NF	NF	NF	NF	NF	NF	NF	NF	NF	NF	NF
Apr-15	17 meter	Chaetomorpha spp.	NF	NF	NF	NF	NF	NF	NF	NF	NF	NF	13 (1.5)	13	NF	NF	NF	NF	NF	NF
Apr-15	17 meter	Canistrocarpus cervicornis	NF	NF	NF	NF	NF	NF	NF	NF	NF	NF	NF	NF	NF	NF	NF	NF	2 (3.0), 5 (0.375)	7
Apr-15	18 meter	Cladophoropsis membranacea	8 (3.0), 1 (1.5), 4 (0.75)	13	NF	NF	3 (0.75), 8 (0.375)	11	NF	NF	NF	NF	NF	NF	4 (3.0), 7 (0.375)	11	2 (3.0), 1 (0.75)	3	NF	NF
Apr-15	18 meter	Canistrocarpus cervicornis	2 (3.0), 1 (0.75)	3	NF	NF	NF	NF	NF	NF	NF	NF	NF	NF	NF	NF	NF	NF	NF	NF
Apr-15	18 meter	Chaetomorpha spp.	NF	NF	NF	NF	NF	NF	NF	NF	NF	NF	3 (0.375)	3	NF	NF	NF	NF	NF	NF
Apr-15	19 meter	Cladophoropsis membranacea	NF	NF	6 (1.5), 3 (0.75)	9	6 (1.5), 1 (0.75)	7	NF	NF	NF	NF	NF	NF	3 (3.0), 3 (0.1875)	6	NF	NF	4 (1.5), 1 (0.1875)	5
Apr-15	20 meter	Chaetomorpha spp.	NF	NF	2 (3.0), 2 (0.75)	4	NF	NF	NF	NF	1 (3.0), 2 (0.375)	3	NF	NF	NF	NF	NF	NF	NF	NF
Apr-15	21 meter	Chaetomorpha spp.	NF	NF	NF	NF	1 (3.0), 2 (0.1875)	3	NF	NF	NF	NF	NF	NF	NF	NF	NF	NF	NF	NF
Apr-15	21 meter	Sargassum polycystum	NF	NF	NF	NF	NF	NF	1 (3.0), 3 (0.75)	4	NF	NF	NF	NF	NF	NF	NF	NF	NF	NF
Apr-15	22 meter	Chaetomorpha spp.	5 (0.75)	5	NF	NF	NF	NF	NF	NF	NF	NF	NF	NF	NF	NF	NF	NF	NF	NF
Apr-15	24 meter	Chaetomorpha spp.	4 (1.5), 3 (0.75)	7	NF	NF	NF	NF	NF	NF	NF	NF	NF	NF	NF	NF	NF	NF	NF	NF
May-15	5 meter	Chaetomorpha spp.	NF	NF	NF	NF	NF	NF	NF	NF	3 (3.0), 1 (0.75)	7	NF	NF	NF	NF	NF	NF	NF	NF
May-15	6 meter	Chaetomorpha spp.	7 (0.75), 1 (0.1875)	8	NF	NF	NF	NF	3 (0.75)	3	NF	NF	NF	NF	NF	NF	NF	NF	NF	NF
May-15	7 meter	Padina australis	NF	NF	NF	NF	NF	NF	NF	NF	2 (3.0), 2 (0.75)	4	NF	NF	NF	NF	NF	NF	NF	NF
May-15	8 meter	Cladophoropsis membranacea	NF	NF	4 (3.0), 6 (0.75)	10	5 (1.5)	5	NF	NF	NF	NF	NF	NF	NF	NF	NF	NF	NF	NF
May-15	8 meter	Canistrocarpus cervicornis	NF	NF	2 (1.5), 1 (0.75)	3	NF	NF	NF	NF	NF	NF	NF	NF	NF	NF	NF	NF	NF	NF
May-15	8 meter	Padina australis	NF	NF	NF	NF	NF	NF	2 (3.0), 1 (0.75)	3	NF	NF	NF	NF	NF	NF	NF	NF	NF	NF
May-15	8 meter	Chaetomorpha spp.	NF	NF	NF	NF	NF	NF	NF	NF	NF	NF	1 (3.0), 7 (0.375)	8	NF	NF	NF	NF	NF	NF
May-15	9 meter	Cladophoropsis membranacea	NF	NF	6 (3.0), 5 (0.75)	11	NF	NF	NF	NF	NF	NF	NF	NF	NF	NF	NF	NF	NF	NF
May-15	9 meter	Jania adhaerens	NF	NF	NF	NF	NF	NF	NF	NF	2 (1.5), 1 (0.75)	3	NF	NF	NF	NF	NF	NF	NF	NF
May-15	9 meter	Chaetomorpha spp.	NF	NF	NF	NF	NF	NF	NF	NF	NF	NF	1 (3.0), 2 (0.75)	3	NF	NF	NF	NF	NF	NF
May-15	10 meter	Cladophoropsis membranacea	6 (3.0), 4 (1.5)	10	NF	NF	10 (3.0), 3 (0.75)	13	NF	NF	NF	NF	NF	NF	NF	NF	NF	NF	NF	NF
May-15	10 meter	Canistrocarpus cervicornis	NF	NF	NF	NF	4 (0.75)	4	NF	NF	NF	NF	NF	NF	NF	NF	NF	NF	NF	NF
May-15	10 meter	Chaetomorpha spp.	NF	NF	NF	NF	NF	NF	NF	NF	NF	NF	2 (1.5), 1 (0.75)	3	NF	NF	NF	NF	NF	NF
May-15	11 meter	Cladophoropsis membranacea	6 (3.0), 2 (0.375)	8	3 (3.0), 3 (0.75)	6	NF	NF	NF	NF	NF	NF	NF	NF	NF	NF	NF	NF	NF	NF
May-15	11 meter	Canistrocarpus cervicornis	3 (0.75)	3	NF	NF	NF	NF	NF	NF	NF	NF	NF	NF	NF	NF	NF	NF	NF	NF
May-15	11 meter	Padina australis	NF	NF	NF	NF	NF	NF	NF	NF	NF	NF	4 (1.5), 2 (0.75)	6	NF	NF	NF	NF	NF	NF
May-15	12 meter	Cladophoropsis membranacea	NF	NF	NF	NF	NF	NF	NF	NF	NF	NF	NF	NF	10 (3.0), 3 (0.375)	13	NF	NF	NF	NF
May-15	12 meter	Padina australis	NF	NF	1 (3.0), 7 (0.375)	8	NF	NF	NF	NF	NF	NF	NF	NF	NF	NF	NF	NF	NF	NF
May-15	13 meter	Cladophoropsis membranacea	5 (3.0), 7 (0.375)	12	3 (3.0), 1 (0.75)	7	9 (3.0), 3 (0.75)	12	NF	NF	NF	NF	NF	NF	NF	NF	NF	NF	NF	NF
May-15	13 meter	Canistrocarpus cervicornis	NF	NF	NF	NF	2 (3.0), 1 (0.75)	3	NF	NF	NF	NF	NF	NF	NF	NF	NF	NF	NF	NF
May-15	13 meter	Chaetomorpha spp.	NF	NF	NF	NF	NF	NF	3 (0.375)	3	2 (1.5), 3 (0.375)	5	NF	NF	NF	NF	NF	NF	NF	NF
May-15	13 meter	Padina boergesenii	NF	NF	NF	NF	NF	NF	NF	NF	NF	NF	NF	NF	NF	NF	1 (1.5), 1 (0.75), 1 (0.1875)	3	NF	NF
May-15	14 meter	Cladophoropsis membranacea	13 (1.5)	13	NF	NF	9 (3.0), 3 (0.75)	12	NF	NF	NF	NF	NF	NF	9 (3.0), 1 (0.375)	10	NF	NF	4 (3.0), 1 (0.75)	5
May-15	14 meter	Canistrocarpus cervicornis	NF	NF	1 (3.0), 1 (1.5)	2	NF	NF	NF	NF	NF	NF	NF	NF	NF	NF	NF	NF	1 (3.0), 3 (0.75)	4
May-15	15 meter	Cladophoropsis membranacea	NF	NF	NF	NF	5 (3.0), 3 (0.75)	8	NF	NF	NF	NF	NF	NF	NF	NF	3 (3.0), 1 (0.75)	7	7 (1.5)	7
May-15	15 meter	Sargassum polycystum	3 (3.0), 1 (0.1875)	5	NF	NF	NF	NF	NF	NF	2 (3.0), 1 (1.5)	3	NF	NF	NF	NF	NF	NF	NF	NF
May-15	15 meter	Canistrocarpus cervicornis	NF	NF	NF	NF	4 (0.75)	4	NF	NF	NF	NF	NF	NF	3 (0.75), 2 (0.1875)	5	NF	NF	NF	NF
May-15	15 meter	Chaetomorpha spp.	NF	NF	NF	NF	NF	NF	5 (3.0), 3 (0.75)	8	NF	NF	NF	NF	NF	NF	NF	NF	NF	NF
May-15	15 meter	Jania adhaerens	NF	NF	NF	NF	NF	NF	5 (1.5), 3 (0.375)	3	NF	NF	NF	NF	NF	NF	NF	NF	NF	NF
May-15	16 meter	Cladophoropsis membranacea	NF	NF	9 (3.0), 3 (0.75)	12	NF	NF	NF	NF	NF	NF	NF	NF	NF	NF	5 (1.5)	5	NF	NF
May-15	17 meter	Cladophoropsis membranacea	NF	NF	9 (3.0), 2 (0.1875)	11	NF	NF	NF	NF	NF	NF	NF	NF	6 (3.0), 3 (0.75)	9	NF	NF	4 (1.5), 9 (0.375)	13
May-15	17 meter	Sargassum polycystum	NF	NF	NF	NF	2 (3.0), 3 (0.75)	5	NF	NF	NF	NF	NF	NF	NF	NF	NF	NF	NF	NF
May-15	17 meter	Chaetomorpha spp.	NF	NF	NF	NF	NF	NF	NF	NF	NF	NF	6 (3.0), 5 (0.75)	11	NF	NF	NF	NF	NF	NF
May-15	17 meter	Canistrocarpus cervicornis	NF	NF	NF	NF	NF	NF	NF	NF	NF	NF	NF	NF	NF	NF	NF	NF	4 (1.5), 1 (0.1875)	5
May-15	18 meter	Cladophoropsis membranacea	9 (3.0), 5 (0.375)	14	NF	NF	3 (1.5), 2 (0.375), 3 (0.1875)	8	NF	NF	NF	NF	NF	NF	10 (1.5)	10	2 (3.0), 1 (1.5)	3	NF	NF
May-15	18 meter	Canistrocarpus cervicornis	1 (3.0), 3 (0.75)	4	NF	NF	NF	NF	NF	NF	NF	NF	NF	NF	NF	NF	NF	NF	NF	NF
May-15	19 meter	Cladophoropsis membranacea	NF	NF	4 (3.0), 2 (0.375)	6	3 (3.0), 1 (0.75)	7	NF	NF	NF	NF	NF	NF	3 (3.0), 3 (0.1875)	6	NF	NF	3 (3.0), 1 (1.5)	4
May-15	20 meter	Chaetomorpha spp.	NF	NF	11 (0.75)	11	NF	NF	NF	NF	1 (3.0), 2 (0.375)	3	NF	NF	NF	NF	NF	NF	NF	NF
May-15	21 meter	Chaetomorpha spp.	NF	NF	NF	NF	2 (1.5), 1 (0.75)	3	NF	NF	NF	NF	NF	NF	NF	NF	NF	NF	NF	NF
May-15	21 meter	Sargassum polycystum	NF	NF	NF	NF	NF	NF	1 (3.0), 1 (1.5), 3 (0.375)	5	NF	NF	NF	NF	NF	NF	NF	NF	NF	NF
May-15	22 meter	Sargassum polycystum	NF	NF	NF	NF	NF	NF	8 (0.75), 1 (0.1875)	9	NF	NF	NF	NF	NF	NF	NF	NF	NF	NF
Jun-15	5 meter	Chaetomorpha spp.	NF	NF	NF	NF	NF	NF	4 (1.5), 1 (0.75)	5	3 (3.0), 4 (0.1875)	7	NF	NF	NF	NF	NF	NF	NF	NF
Jun-15	6 meter	Chaetomorpha spp.	1 (3.0), 5 (0.375)	6	NF	NF	NF	NF	3 (0.75)	3	NF	NF	NF	NF	NF	NF	NF	NF	NF	NF
Jun-15	7 meter	Padina australis	NF	NF	NF	NF	NF	NF	NF	NF	2 (1.5), 1 (0.375)	3	NF	NF	NF	NF	NF	NF	NF	NF
Jun-15	8 meter	Cladophoropsis membranacea	NF	NF	5 (3.0), 2 (0.375)	7	2 (3.0), 7 (0.1875)	9	NF	NF	NF	NF	NF	NF	NF	NF	NF	NF	NF	NF
Jun-15	8 meter	Canistrocarpus cervicornis	NF	NF	3 (0.75)	3	NF	NF	NF	NF	NF	NF	NF	NF	NF	NF	NF	NF	NF	NF
Jun-15	8 meter	Padina australis	NF	NF	NF	NF	NF	NF	1 (3.0), 3 (0.75)	4	NF	NF	NF	NF	NF	NF	NF	NF	NF	NF
Jun-15	8 meter	Chaetomorpha spp.	NF	NF	NF	NF	NF	NF	NF	NF	NF	NF	NF	NF	NF	NF	NF	NF	NF	NF
Jun-15	9 meter	Cladophoropsis membranacea	NF	NF	7 (3.0), 1 (0.375)	8	NF	NF	NF	NF	NF	NF	NF	NF	NF	NF	NF	NF	NF	NF
Jun-15	9 meter	Sargassum polycystum	1 (3.0), 1 (0.75)	3	NF	NF	NF	NF	NF	NF	NF	NF	NF	NF	NF	NF	NF	NF	NF	NF
Jun-15	9 meter	Jania adhaerens	NF	NF	NF	NF	NF	NF	NF	NF	3 (0.75), 1 (0.375)	4	NF	NF	NF	NF	NF	NF	NF	NF
Jun-15	9 meter	Chaetomorpha spp.	NF	NF	NF	NF	NF	NF	NF	NF	NF	NF	1 (3.0), 2 (0.75)	3	NF	NF	NF	NF	NF	NF
Jun-15	10 meter	Cladophoropsis membranacea	6 (3.0), 4 (0.375)	10	NF	NF	10 (3.0), 3 (0.75)	13	NF	NF	NF	NF	NF	NF	NF	NF	NF	NF	NF	NF
Jun-15	10 meter	Canistrocarpus cervicornis	NF	NF	NF	NF	1 (1.5), 3 (0.375), 1 (0.1875)	5	NF	NF	NF	NF	NF	NF	NF	NF	NF	NF	NF	NF
Jun-15	10 meter	Chaetomorpha spp.	NF	NF	NF	NF	NF	NF	NF	NF	NF	NF	2 (1.5), 1 (0.75)	3	NF	NF	NF	NF	NF	NF
Jun-15	11 meter	Cladophoropsis membranacea	6 ( 3.0), 2 (0.375)	8	8 (1.5), 1 (0.75)	7	NF	NF	NF	NF	NF	NF	NF	NF	NF	NF	NF	NF	NF	NF
Jun-15	11 meter	Canistrocarpus cervicornis	3 (0.375)	3	NF	NF	NF	NF	NF	NF	NF	NF	NF	NF	NF	NF	NF	NF	NF	NF
Jun-15	12 meter	Cladophoropsis membranacea	NF	NF	NF	NF	NF	NF	NF	NF	NF	NF	NF	NF	10 (3.0), 3 (0.375)	13	NF	NF	NF	NF
Jun-15	12 meter	Padina australis	NF	NF	2 (1.5), 3 (0.75)	3	NF	NF	NF	NF	NF	NF	1 (3.0), 4 (1.5), 5 (0.375)	10	NF	NF	NF	NF	NF	NF
Jun-15	13 meter	Cladophoropsis membranacea	6 (3.0), 2 (0.75)	8	3 (3.0), 3 (0.75)	6	7 (3.0), 5 (1.5), 3 (0.375)	15	NF	NF	NF	NF	NF	NF	NF	NF	NF	NF	NF	NF
Jun-15	13 meter	Canistrocarpus cervicornis	NF	NF	NF	NF	1 (3.0), 1 (0.375)	2	NF	NF	NF	NF	NF	NF	NF	NF	NF	NF	NF	NF
Jun-15	13 meter	Chaetomorpha spp.	NF	NF	NF	NF	NF	NF	3 (0.375)	3	1 (1.5), 5 (0.75)	6	NF	NF	NF	NF	NF	NF	NF	NF
Jun-15	13 meter	Padina boergesenii	NF	NF	NF	NF	NF	NF	NF	NF	NF	NF	NF	NF	NF	NF	1 (1.5), 3 (0.375)	4	NF	NF
Jun-15	14 meter	Cladophoropsis membranacea	6 (3.0), 3 (0.75), 6 (0.1875)	15	NF	NF	9 (3.0), 3 (0.75), 3 (0.1875)	15	NF	NF	NF	NF	NF	NF	9 (3.0), 3 (0.75)	12	NF	NF	4 (3.0), 1 (0.75)	5
Jun-15	14 meter	Canistrocarpus cervicornis	NF	NF	3 (0.75)	3	NF	NF	NF	NF	NF	NF	NF	NF	NF	NF	NF	NF	3 (0.75), 3 (0.1875)	6
Jun-15	15 meter	Cladophoropsis membranacea	NF	NF	NF	NF	5 (3.0), 3 (0.75)	8	NF	NF	NF	NF	NF	NF	NF	NF	2 (3.0), 3 (0.75), 1 (0.375)	6	3 (3.0), 1 (1.5)	4
Jun-15	15 meter	Sargassum polycystum	3 (3.0), 1 (0.375), 1 (0.1875)	5	NF	NF	NF	NF	NF	NF	3 (3.0), 1 ( 0.375)	4	NF	NF	NF	NF	NF	NF	NF	NF
Jun-15	15 meter	Canistrocarpus cervicornis	NF	NF	NF	NF	2 (1.5)	2	NF	NF	NF	NF	NF	NF	1 (3.0), 1 (0.75)	2	NF	NF	NF	NF
Jun-15	15 meter	Chaetomorpha spp.	NF	NF	NF	NF	NF	NF	10 (1.5), 3 (0.75)	13	NF	NF	NF	NF	NF	NF	NF	NF	NF	NF
Jun-15	15 meter	Jania adhaerens	NF	NF	NF	NF	NF	NF	3 (1.5)	3	NF	NF	NF	NF	NF	NF	NF	NF	NF	NF
Jun-15	16 meter	Cladophoropsis membranacea	NF	NF	9 (3.0), 3 (0.375)	12	NF	NF	NF	NF	NF	NF	NF	NF	NF	NF	2 (3.0), 7 (0.1875)	9	NF	NF
Jun-15	17 meter	Cladophoropsis membranacea	NF	NF	9 (3.0), 2 (0.1875)	11	NF	NF	NF	NF	NF	NF	NF	NF	6 (3.0), 2 (0.75)	8	NF	NF	3 (3.0), 2 (0.75)	5
Jun-15	17 meter	Sargassum polycystum	NF	NF	NF	NF	4 (3.0), 2 (0.375)	6	NF	NF	NF	NF	NF	NF	NF	NF	NF	NF	NF	NF
Jun-15	17 meter	Chaetomorpha spp.	NF	NF	NF	NF	NF	NF	NF	NF	NF	NF	7 (3.0), 1 (0.375)	8	NF	NF	NF	NF	NF	NF
Jun-15	17 meter	Canistrocarpus cervicornis	NF	NF	NF	NF	NF	NF	NF	NF	NF	NF	NF	NF	NF	NF	NF	NF	2 (1.5), 1 (0.75)	3
Jun-15	18 meter	Cladophoropsis membranacea	9 (3.0), 3 (0.75)	12	NF	NF	6 (1.5), 3 (0.1875)	9	NF	NF	NF	NF	NF	NF	4 (3.0), 2 (1.5)	6	2 (3.0), 3 (0.75)	5	NF	NF
Jun-15	18 meter	Canistrocarpus cervicornis	3 (0.75)	3	NF	NF	NF	NF	NF	NF	NF	NF	NF	NF	NF	NF	NF	NF	NF	NF
Jun-15	19 meter	Cladophoropsis membranacea	NF	NF	4 (3.0), 2 (0.375)	6	3 (3.0), 1 (0.75)	4	NF	NF	NF	NF	NF	NF	3 (3.0), 1 (0.75)	4	NF	NF	3 (3.0), 3 (0.75)	6
Jun-15	20 meter	Chaetomorpha spp.	NF	NF	2 (3.0), 2 (0.1875)	4	NF	NF	NF	NF	1 (3.0), 2 (0.375)	3	NF	NF	NF	NF	NF	NF	NF	NF
Jun-15	21 meter	Chaetomorpha spp.	NF	NF	NF	NF	1 (3.0), 2 (0.1875)	3	NF	NF	NF	NF	NF	NF	NF	NF	NF	NF	NF	NF
Jun-15	21 meter	Sargassum polycystum	NF	NF	NF	NF	NF	NF	6 (1.5), 3 (0.75)	9	NF	NF	NF	NF	NF	NF	NF	NF	NF	NF
Jun-15	22 meter	Sargassum paniculatum	1 (1.5)	1	NF	NF	NF	NF	NF	NF	NF	NF	NF	NF	NF	NF	NF	NF	NF	NF
Jun-15	22 meter	Sargassum polycystum	NF	NF	NF	NF	NF	NF	3 (3.0), 3 (0.1875)	6	NF	NF	NF	NF	NF	NF	NF	NF	NF	NF
Jun-15	24 meter	Chaetomorpha spp.	1 (3.0), 9 (0.1875)	10	NF	NF	NF	NF	NF	NF	NF	NF	NF	NF	NF	NF	NF	NF	NF	NF
Jul-15	5 meter	Chaetomorpha spp.	NF	NF	NF	NF	NF	NF	NF	NF	2 (3.0), 2 (1.5), 2 (0.375)	6	NF	NF	NF	NF	NF	NF	NF	NF
Jul-15	6 meter	Chaetomorpha spp.	2 (1.5), 3 (0.375)	5	NF	NF	NF	NF	NF	NF	NF	NF	NF	NF	NF	NF	NF	NF	NF	NF
Jul-15	8 meter	Cladophoropsis membranacea	NF	NF	5 (3.0), 2 (0.375)	7	2 (3.0), 5 (0.375)	7	NF	NF	NF	NF	NF	NF	NF	NF	NF	NF	NF	NF
Jul-15	8 meter	Chaetomorpha spp.	NF	NF	NF	NF	NF	NF	NF	NF	3 (0.375)	3	1 (3.0), 3 (0.75), 2 (0.1875)	6	NF	NF	NF	NF	NF	NF
Jul-15	9 meter	Cladophoropsis membranacea	NF	NF	6 (3.0), 2 (0.75)	8	NF	NF	NF	NF	NF	NF	NF	NF	NF	NF	NF	NF	NF	NF
Jul-15	9 meter	Sargassum polycystum	3 (0.75), 8 (0.375)	11	NF	NF	NF	NF	NF	NF	NF	NF	NF	NF	NF	NF	NF	NF	NF	NF
Jul-15	9 meter	Chaetomorpha spp.	NF	NF	NF	NF	NF	NF	NF	NF	NF	NF	2 (1.5), 2 (0.75)	4	NF	NF	NF	NF	NF	NF
Jul-15	10 meter	Cladophoropsis membranacea	7 (3.0), 1 (0.375)	8	NF	NF	10 (3.0), 3 (0.75)	13	NF	NF	NF	NF	NF	NF	NF	NF	NF	NF	NF	NF
Jul-15	11 meter	Cladophoropsis membranacea	6 (3.0), 2 (0.75)	8	4 (3.0), 2 (0.375)	6	NF	NF	NF	NF	NF	NF	NF	NF	NF	NF	NF	NF	NF	NF
Jul-15	11 meter	Dictyota mertensi	NF	NF	NF	NF	NF	NF	NF	NF	NF	NF	1 (1.5), 2 (0.75)	3	NF	NF	NF	NF	NF	NF
Jul-15	12 meter	Cladophoropsis membranacea	NF	NF	NF	NF	NF	NF	NF	NF	NF	NF	NF	NF	9 (3.0), 3 (0.75)	12	NF	NF	NF	NF
Jul-15	12 meter	Padina australis	NF	NF	2 (1.5), 3 (0.75)	5	NF	NF	NF	NF	NF	NF	2 (1.5), 1 (0.75)	3	NF	NF	NF	NF	NF	NF
Jul-15	12 meter	Sargassum polycystum	NF	NF	NF	NF	1 (1.5), 3 (0.375)	4	NF	NF	NF	NF	3 (0.75), 8 (0.375)	11	NF	NF	NF	NF	NF	NF
Jul-15	13 meter	Cladophoropsis membranacea	6 (3.0), 3 (0.75)	9	3 (3.0), 3 (0.75)	6	9 (3.0), 1 (1.5), 3 (0.375)	13	NF	NF	NF	NF	NF	NF	NF	NF	NF	NF	NF	NF
Jul-15	13 meter	Chaetomorpha spp.	NF	NF	NF	NF	NF	NF	NF	NF	2 (1.5), 3 (0.375)	5	NF	NF	NF	NF	NF	NF	NF	NF
Jul-15	14 meter	Cladophoropsis membranacea	7 (3.0), 1 (0.375)	9	NF	NF	9 (3.0), 3 (0.75)	12	NF	NF	NF	NF	NF	NF	9 (3.0), 3 (0.75)	12	NF	NF	4 (3.0), 1 (0.75)	5
Jul-15	15 meter	Cladophoropsis membranacea	NF	NF	NF	NF	5 (3.0), 3 (0.75)	8	NF	NF	NF	NF	NF	NF	NF	NF	2 (3.0), 3 (0.75)	5	3 (3.0), 2 (0.75)	5
Jul-15	15 meter	Sargassum polycystum	3 (3.0), 1 (0.75)	4	NF	NF	NF	NF	NF	NF	3 (3.0), 3 (0.75)	6	NF	NF	NF	NF	NF	NF	NF	NF
Jul-15	15 meter	Chaetomorpha spp.	NF	NF	NF	NF	NF	NF	4 (1.5), 15 (0.75)	19	NF	NF	NF	NF	NF	NF	NF	NF	NF	NF
Jul-15	16 meter	Cladophoropsis membranacea	NF	NF	9 (3.0), 1 (1.5), 1 (0.75)	11	NF	NF	NF	NF	NF	NF	NF	NF	NF	NF	3 (3.0), 2 (0.375)	5	NF	NF
Jul-15	16 meter	Sargassum polycystum	3 (0.75), 8 (0.375)	11	NF	NF	NF	NF	NF	NF	NF	NF	NF	NF	NF	NF	NF	NF	NF	NF
Jul-15	17 meter	Cladophoropsis membranacea	NF	NF	8 (3.0), 3 (0.75)	11	NF	NF	NF	NF	NF	NF	NF	NF	6 (3.0), 2 (0.75)	8	NF	NF	3 (3.0), 2 (0.75)	5
Jul-15	17 meter	Sargassum polycystum	NF	NF	NF	NF	4 (3.0), 1 (0.1875)	5	NF	NF	NF	NF	NF	NF	NF	NF	NF	NF	NF	NF
Jul-15	17 meter	Chaetomorpha spp.	NF	NF	NF	NF	NF	NF	NF	NF	NF	NF	7 (3.0), 1 (0.375)	8	NF	NF	NF	NF	NF	NF
Jul-15	18 meter	Cladophoropsis membranacea	9 (3.0), 3 (0.75)	12	NF	NF	6 (1.5), 3 (0.75)	9	NF	NF	NF	NF	NF	NF	1 (3.0),2 (1.5), 12 (0.75),	15	6 (1.5), 1 (0.75)	7	NF	NF
Jul-15	19 meter	Cladophoropsis membranacea	NF	NF	4 (3.0), 2 (0.1875)	6	6 (1.5), 3 (0.1875)	9	NF	NF	NF	NF	NF	NF	3 (3.0), 1 (1.5)	4	NF	NF	4 (3.0), 3 (0.1875)	7
Jul-15	19 meter	Chaetomorpha spp.	NF	NF	2 (3.0), 2 (0.375)	4	NF	NF	NF	NF	NF	NF	NF	NF	NF	NF	NF	NF	NF	NF
Jul-15	21 meter	Dictyota mertensi	NF	NF	2 (0.75), 1 (0.375), 1 (0.1875)	4	NF	NF	NF	NF	NF	NF	NF	NF	NF	NF	NF	NF	NF	NF
Jul-15	21 meter	Sargassum polycystum	NF	NF	NF	NF	NF	NF	3 (3.0), 3 (0.75)	6	NF	NF	NF	NF	NF	NF	NF	NF	NF	NF
Jul-15	22 meter	Sargassum paniculatum	1 (3.0), 1 (1.5), 3 (0.375)	5	NF	NF	NF	NF	NF	NF	NF	NF	NF	NF	NF	NF	NF	NF	NF	NF
Jul-15	22 meter	Sargassum polycystum	NF	NF	NF	NF	NF	NF	2 (3.0), 1 (1.5)	3	NF	NF	NF	NF	NF	NF	NF	NF	NF	NF
Aug-15	5 meter	Chaetomorpha spp.	NF	NF	NF	NF	NF	NF	2 (1.5), 3 (0.75)	5	4 (1.5), 2 (0.75)	6	NF	NF	NF	NF	NF	NF	NF	NF
Aug-15	6 meter	Chaetomorpha spp.	1 (1.5), 2 (0.75)	3	NF	NF	NF	NF	NF	NF	NF	NF	NF	NF	NF	NF	NF	NF	NF	NF
Aug-15	8 meter	Cladophoropsis membranacea	NF	NF	4 (3.0), 7 (0.375)	11	2 (3.0), 3 (0.75)	5	NF	NF	NF	NF	NF	NF	NF	NF	NF	NF	NF	NF
Aug-15	8 meter	Chaetomorpha spp.	NF	NF	NF	NF	NF	NF	NF	NF	NF	NF	1 (3.0), 3 (0.75), 2 (0.1875)	6	NF	NF	NF	NF	NF	NF
Aug-15	9 meter	Cladophoropsis membranacea	NF	NF	6 (3.0), 2 (0.75)	8	NF	NF	NF	NF	NF	NF	NF	NF	NF	NF	NF	NF	NF	NF
Aug-15	9 meter	Sargassum polycystum	3 (1.5), 1 (0.75)	4	NF	NF	NF	NF	NF	NF	NF	NF	NF	NF	NF	NF	NF	NF	NF	NF
Aug-15	10 meter	Cladophoropsis membranacea	7 (3.0), 1 (0.375)	8	NF	NF	10 (3.0), 3 (0.75)	13	NF	NF	NF	NF	NF	NF	NF	NF	NF	NF	NF	NF
Aug-15	11 meter	Cladophoropsis membranacea	6 (3.0), 2 (0.75)	8	4 (3.0), 1 (0.75)	5	NF	NF	NF	NF	NF	NF	NF	NF	NF	NF	NF	NF	NF	NF
Aug-15	12 meter	Cladophoropsis membranacea	NF	NF	NF	NF	NF	NF	NF	NF	NF	NF	NF	NF	9 (3.0), 3 (0.375)	12	NF	NF	NF	NF
Aug-15	13 meter	Cladophoropsis membranacea	6 (3.0), 2 (0.75)	8	6 (1.5), 1 (1.5)	7	9 (3.0), 3 (0.75)	12	NF	NF	NF	NF	NF	NF	NF	NF	NF	NF	NF	NF
Aug-15	13 meter	Chaetomorpha spp.	NF	NF	NF	NF	NF	NF	NF	NF	2 (1.5), 2 (0.1875)	4	NF	NF	NF	NF	NF	NF	NF	NF
Aug-15	14 meter	Cladophoropsis membranacea	7 (3.0), 1 (0.375)	8	NF	NF	9 (3.0), 1 (1.5)	10	NF	NF	NF	NF	NF	NF	9 (3.0), 3 (0.75)	12	NF	NF	4 (3.0)	4
Aug-15	15 meter	Cladophoropsis membranacea	NF	NF	NF	NF	5 (3.0), 3 (0.375)	8	NF	NF	NF	NF	NF	NF	NF	NF	2 (3.0), 2 (0.1875)	4	3 (3.0), 1 (1.5)	5
Aug-15	15 meter	Sargassum polycystum	1 (3.0), 3 (0.75), 2 (0.1875)	6	NF	NF	NF	NF	NF	NF	3 (3.0), 3 (0.75)	6	NF	NF	NF	NF	NF	NF	NF	NF
Aug-15	15 meter	Chaetomorpha spp.	NF	NF	NF	NF	NF	NF	8 (1.5), 7 (0.75)	15	NF	NF	NF	NF	NF	NF	NF	NF	NF	NF
Aug-15	16 meter	Cladophoropsis membranacea	NF	NF	9 (3.0), 2 (0.1875)	11	NF	NF	NF	NF	NF	NF	NF	NF	NF	NF	3 (3.0),2 (0.375)	5	NF	NF
Aug-15	16 meter	Sargassum polycystum	1 (3.0), 2 (0.1875)	3	NF	NF	NF	NF	NF	NF	NF	NF	NF	NF	NF	NF	NF	NF	NF	NF
Aug-15	17 meter	Cladophoropsis membranacea	NF	NF	7 (3.0)	7	NF	NF	NF	NF	NF	NF	NF	NF	6 (3.0), 2 (0.75)	8	NF	NF	3 (3.0),2 (0.375)	4
Aug-15	17 meter	Sargassum polycystum	NF	NF	NF	NF	4 (1.5), 2 (0.75)	6	NF	NF	NF	NF	NF	NF	NF	NF	NF	NF	NF	NF
Aug-15	17 meter	Chaetomorpha spp.	NF	NF	NF	NF	NF	NF	NF	NF	NF	NF	7 (3.0), 1 (0.375)	8	NF	NF	NF	NF	NF	NF
Aug-15	18 meter	Cladophoropsis membranacea	9 (3.0), 2 (0.1875)	11	NF	NF	2 (3.0), 3 (0.75)	5	NF	NF	NF	NF	NF	NF	4 (3.0), 1 (0.75)	5	3 (3.0), 1 (1.5)	4	NF	NF
Aug-15	19 meter	Cladophoropsis membranacea	NF	NF	6 (1.5), 1 (1.5)	7	6 (1.5), 1 (0.1875)	7	NF	NF	NF	NF	NF	NF	3 (3.0), 1 (1.5)	4	NF	NF	4 (3.0), 1 (0.75)	5
Aug-15	21 meter	Sargassum polycystum	NF	NF	NF	NF	NF	NF	1 (3.0), 2 (0.375)	3	NF	NF	NF	NF	NF	NF	NF	NF	NF	NF
Aug-15	22 meter	Sargassum paniculatum	1 (3.0), 1 (1.5)	2	NF	NF	NF	NF	NF	NF	NF	NF	NF	NF	NF	NF	NF	NF	NF	NF
Aug-15	22 meter	Sargassum polycystum	NF	NF	NF	NF	NF	NF	1 (3.0), 1 (0.375)	2	NF	NF	NF	NF	NF	NF	NF	NF	NF	NF
Sep-15	5 meter	Chaetomorpha spp.	NF	NF	NF	NF	NF	NF	2 (1.5), 1 (0.75)	3	3 (0.75)	3	NF	NF	NF	NF	NF	NF	NF	NF
Sep-15	5 meter	Chaetomorpha spp.	NF	NF	NF	NF	NF	NF	NF	NF	NF	NF	1 (3.0), 1 (0.375)	2	NF	NF	NF	NF	NF	NF
Sep-15	9 meter	Cladophoropsis membranacea	NF	NF	5 (3.0), 3 (0.75)	8	NF	NF	NF	NF	NF	NF	NF	NF	NF	NF	NF	NF	NF	NF
Sep-15	9 meter	Sargassum polycystum	3 (0.75)	3	NF	NF	NF	NF	NF	NF	NF	NF	NF	NF	NF	NF	NF	NF	NF	NF
Sep-15	10 meter	Cladophoropsis membranacea	5 (3.0), 5 (0.375)	10	NF	NF	9 (3.0)	9	NF	NF	NF	NF	NF	NF	NF	NF	NF	NF	NF	NF
Sep-15	11 meter	Cladophoropsis membranacea	5 (3.0), 2 (0.375)	7	NF	NF	NF	NF	NF	NF	NF	NF	NF	NF	NF	NF	NF	NF	NF	NF
Sep-15	12 meter	Cladophoropsis membranacea	NF	NF	NF	NF	NF	NF	NF	NF	NF	NF	NF	NF	9 (3.0), 3 (0.375)	12	NF	NF	NF	NF
Sep-15	13 meter	Cladophoropsis membranacea	5 (3.0), 3 (0.75)	8	NF	NF	7 (3.0), 3 (0.375)	10	NF	NF	NF	NF	NF	NF	NF	NF	NF	NF	NF	NF
Sep-15	14 meter	Cladophoropsis membranacea	7 (3.0)	7	NF	NF	NF	NF	NF	NF	NF	NF	NF	NF	9 (3.0), 3 (0.75)	12	NF	NF	NF	NF
Sep-15	14 meter	Sargassum polycystum	1 (3.0), 1 (0.375)	2	NF	NF	NF	NF	NF	NF	1 (3.0), 2 (0.1875)	3	NF	NF	NF	NF	NF	NF	NF	NF
Sep-15	14 meter	Chaetomorpha spp.	NF	NF	NF	NF	NF	NF	5 (3.0), 6 (0.375)	11	NF	NF	NF	NF	NF	NF	NF	NF	NF	NF
Sep-15	16 meter	Cladophoropsis membranacea	NF	NF	8 (3.0), 1 (1.5)	9	NF	NF	NF	NF	NF	NF	NF	NF	NF	NF	NF	NF	NF	NF
Sep-15	17 meter	Cladophoropsis membranacea	NF	NF	7 (3.0)	7	NF	NF	NF	NF	NF	NF	NF	NF	5 (3.0), 7 (0.375)	12	NF	NF	NF	NF
Sep-15	17 meter	Chaetomorpha spp.	NF	NF	NF	NF	NF	NF	NF	NF	NF	NF	5 (3.0), 7 (0.375)	12	NF	NF	NF	NF	NF	NF
Sep-15	18 meter	Cladophoropsis membranacea	7 (3.0), 5 (0.375)	12	NF	NF	NF	NF	NF	NF	NF	NF	NF	NF	NF	NF	NF	NF	NF	NF
Sep-15	22 meter	Sargassum paniculatum	1 (3.0), 1 (0.375)	2	NF	NF	NF	NF	NF	NF	NF	NF	NF	NF	NF	NF	NF	NF	NF	NF
Jan-16	5 meter	Chaetomorpha spp.	NF	NF	NF	NF	NF	NF	9 (0.375)	9	6 (1.5), 3 (0.75)	9	NF	NF	NF	NF	NF	NF	NF	NF
Jan-16	6 meter	Chaetomorpha spp.	5 (0.375), 3 (0.1875)	8	NF	NF	NF	NF	NF	NF	NF	NF	NF	NF	NF	NF	NF	NF	NF	NF
Jan-16	6 meter	Chaetomorpha spp.	NF	NF	NF	NF	NF	NF	NF	NF	NF	NF	2 (3.0), 3 (0.75), 1 (0.375)	6	NF	NF	NF	NF	NF	NF
Jan-16	9 meter	Chaetomorpha spp.	NF	NF	NF	NF	NF	NF	NF	NF	NF	NF	1 (3.0), 1 (0.375)	2	NF	NF	NF	NF	NF	NF
Jan-16	13 meter	Chaetomorpha spp.	NF	NF	NF	NF	NF	NF	2 (1.5), 1 (0.75)	3	NF	NF	NF	NF	NF	NF	NF	NF	NF	NF
Jan-16	15 meter	Chaetomorpha spp.	NF	NF	NF	NF	NF	NF	7 (3.0), 1 (0.375)	8	NF	NF	NF	NF	NF	NF	NF	NF	NF	NF
Jan-16	17 meter	Chaetomorpha spp.	NF	NF	NF	NF	NF	NF	NF	NF	NF	NF	6 (3.0), 2 (0.75)	8	NF	NF	NF	NF	NF	NF
Jan-16	20 meter	Cladophoropsis membranacea	NF	NF	3 (3.0), 1 (1.5)	4	NF	NF	NF	NF	NF	NF	NF	NF	NF	NF	NF	NF	NF	NF
Jan-16	20 meter	Chaetomorpha spp.	NF	NF	NF	NF	NF	NF	NF	NF	1 (3.0), 1 (0.375)	2	NF	NF	NF	NF	NF	NF	NF	NF
Jan-16	21 meter	Chaetomorpha spp.	NF	NF	NF	NF	7 (0.375), 3 (0.375)	10	NF	NF	NF	NF	NF	NF	NF	NF	NF	NF	NF	NF
Jan-16	22 meter	Chaetomorpha spp.	1 (3.0), 2 (0.375)	3	NF	NF	NF	NF	NF	NF	NF	NF	NF	NF	NF	NF	NF	NF	NF	NF
Jan-16	24 meter	Chaetomorpha spp.	6 (1.5), 3 (0.75)	9	NF	NF	NF	NF	NF	NF	NF	NF	NF	NF	NF	NF	NF	NF	NF	NF
Feb-16	5 meter	Chaetomorpha spp.	NF	NF	NF	NF	NF	NF	5 (1.5)	5	4 (3.0), 3 (0.1875)	7	NF	NF	NF	NF	NF	NF	NF	NF
Feb-16	6 meter	Chaetomorpha spp.	3 (1.5), 2 (0.375), 1 (0.1875)	6	NF	NF	NF	NF	NF	NF	NF	NF	NF	NF	NF	NF	NF	NF	NF	NF
Feb-16	8 meter	Chaetomorpha spp.	NF	NF	NF	NF	NF	NF	NF	NF	NF	NF	4 (1.5), 9 (0.375)	13	NF	NF	NF	NF	NF	NF
Feb-16	9 meter	Chaetomorpha spp.	NF	NF	NF	NF	NF	NF	NF	NF	NF	NF	1 (3.0), 3 (0.75)	4	NF	NF	NF	NF	NF	NF
Feb-16	13 meter	Chaetomorpha spp.	NF	NF	NF	NF	NF	NF	1 (3.0), 3 (0.75)	4	17 (0.375)	17	NF	NF	NF	NF	NF	NF	NF	NF
Feb-16	15 meter	Chaetomorpha spp.	NF	NF	NF	NF	NF	NF	9 (3.0), 2 (0.1875)	11	NF	NF	NF	NF	NF	NF	NF	NF	NF	NF
Feb-16	20 meter	Chaetomorpha spp.	NF	NF	7 (1.5), 3 (0.375)	10	NF	NF	NF	NF	NF	NF	NF	NF	NF	NF	NF	NF	NF	NF
