# Supplementary material for: Spatial and temporal distribution dataset of benthic macroalgae during the 2015-2016 tropical monsoonal cycle in Malaysia
Source: Biodivers Data J. 2022 Jul 26;10:e85676. doi: 10.3897/BDJ.10.e85676 (PMC9848546; doi:10.3897/BDJ.10.e85676)
Supplement: Supplementary material 5 — Raw data of cover and frequency of macroalgae recorded at Tanjung Lompat [file bdj-10-e85676-s005.csv]

Sampling period	Quadrat	Species	Vertical count (Multiplier)_TL1	No.of sub-quadrat_TL1	Vertical count (Multiplier)_TL2	No.of sub-quadrat_TL2	Vertical count (Multiplier)_TL3	No.of sub-quadrat_TL3	Vertical count (Multiplier)_TL4	No.of sub-quadrat_TL4	Vertical count (Multiplier)_TL5	No.of sub-quadrat_TL5	Vertical count (Multiplier)_TL6	No.of sub-quadrat_TL6	Vertical count (Multiplier)_TL7	No.of sub-quadrat_TL7	Vertical count (Multiplier)_TL8	No.of sub-quadrat_TL8	Vertical count (Multiplier)_TL9	No.of sub-quadrat_TL9
Jan-15	2 meter	Chaetomorpha spp.	NF	NF	NF	NF	NF	NF	2 (3.0), 2 (0.75)	4	NF	NF	NF	NF	NF	NF	2 (3.0), 3 (0.375)	5	NF	NF
Jan-15	2 meter	Ulva intestinalis	NF	NF	NF	NF	NF	NF	3 (1.5), 1 (0.75)	4	NF	NF	NF	NF	NF	NF	NF	NF	NF	NF
Jan-15	2 meter	Cladophora vagabunda	NF	NF	NF	NF	NF	NF	NF	NF	NF	NF	NF	NF	NF	NF	3 (1.5), 3 (0.375)	6	NF	NF
Jan-15	3 meter	Chaetomorpha spp.	2 (1.5), 1 (0.375)	3	NF	NF	NF	NF	NF	NF	NF	NF	NF	NF	NF	NF	NF	NF	NF	NF
Jan-15	3 meter	Ulva intestinalis	NF	NF	NF	NF	NF	NF	NF	NF	3 (0.75)	3	NF	NF	NF	NF	NF	NF	NF	NF
Jan-15	4 meter	Chaetomorpha spp.	NF	2 (3.0), 3 (0.75)	5	NF	NF	NF	NF	NF	NF	NF	NF	NF	NF	NF	NF	NF	NF	NF
Jan-15	4 meter	Cladophora vagabunda	NF	NF	NF	NF	NF	NF	NF	NF	NF	NF	NF	NF	1 (3.0), 2 (0.1875)	3	NF	NF	1 (3.0), 3 (0.375)	4
Jan-15	4 meter	Ulva intestinalis	NF	NF	NF	NF	NF	NF	NF	NF	NF	NF	NF	NF	NF	NF	1 (3.0), 4 (1.5), 1 (0.75)	6	NF	NF
Jan-15	5 meter	Acanthophora spicifera	NF	NF	1 (3.0), 7 (0.375)	8	NF	NF	NF	NF	NF	NF	NF	NF	NF	NF	NF	NF	NF	NF
Jan-15	5 meter	Chaetomorpha spp.	NF	NF	NF	NF	NF	NF	NF	NF	2 (3.0), 4 (0.1875)	6	NF	NF	2 (3.0), 5 (0.375)	7	NF	NF	3 (3.0), 3 (0.75)	6
Jan-15	6 meter	Ulva intestinalis	NF	NF	NF	NF	NF	NF	NF	NF	NF	NF	1 (3.0), 3 (0.375)	4	NF	NF	NF	NF	NF	NF
Jan-15	7 meter	Acanthophora spicifera	NF	NF	3 (1.5), 3 (0.375)	6	NF	NF	NF	NF	NF	NF	NF	NF	NF	NF	NF	NF	NF	NF
Jan-15	7 meter	Cladophora vagabunda	NF	NF	NF	NF	NF	NF	NF	NF	NF	NF	2 (1.5), 1 (0.375)	3	NF	NF	NF	NF	NF	NF
Jan-15	8 meter	Hypnea spinella	NF	NF	2 (1.5), 1 (0.375)	3	NF	NF	NF	NF	NF	NF	NF	NF	NF	NF	NF	NF	NF	NF
Jan-15	8 meter	Ulva intestinalis	NF	NF	2 (3.0), 3 (0.375)	5	NF	NF	NF	NF	NF	NF	NF	NF	NF	NF	NF	NF	NF	NF
Jan-15	8 meter	Cladophora vagabunda	NF	NF	NF	NF	NF	NF	NF	NF	NF	NF	NF	NF	NF	NF	2 (3.0), 5 (0.1875)	7	NF	NF
Jan-15	9 meter	Acanthophora spicifera	2 (3.0), 3 (0.75), 3 (0.1875)	8	NF	NF	NF	NF	NF	NF	NF	NF	NF	NF	NF	NF	NF	NF	NF	NF
Jan-15	9 meter	Hypnea spinella	2 (3.0), 5 (0.1875)	7	NF	NF	NF	NF	NF	NF	NF	NF	NF	NF	NF	NF	NF	NF	NF	NF
Jan-15	9 meter	Ulva intestinalis	NF	NF	NF	NF	NF	NF	NF	NF	NF	NF	NF	NF	2 (1.5), 1 (0.75)	3	NF	NF	NF	NF
Jan-15	10 meter	Ulva intestinalis	NF	NF	NF	NF	NF	NF	3 (1.5), 5 (0.1875)	8	NF	NF	NF	NF	NF	NF	NF	NF	NF	NF
Jan-15	11 meter	Ulva intestinalis	NF	NF	NF	NF	3 (3.0), 1 (0.1875)	4	NF	NF	NF	NF	NF	NF	NF	NF	NF	NF	NF	NF
Jan-15	12 meter	Ulva intestinalis	NF	NF	NF	NF	3 (3.0), 3 (0.75)	6	NF	NF	NF	NF	NF	NF	NF	NF	NF	NF	NF	NF
Jan-15	13 meter	Chaetomorpha spp.	NF	NF	NF	NF	NF	NF	NF	NF	NF	NF	3 (0.75)	3	NF	NF	NF	NF	NF	NF
Jan-15	13 meter	Ulva intestinalis	NF	NF	NF	NF	NF	NF	NF	NF	NF	NF	NF	NF	NF	NF	NF	NF	1 (3.0), 3 (0.375)	4
Jan-15	14 meter	Chaetomorpha spp.	2 (0.1875)	2	NF	NF	NF	NF	NF	NF	NF	NF	NF	NF	NF	NF	NF	NF	NF	NF
Jan-15	15 meter	Chaetomorpha spp.	NF	NF	NF	NF	3 (1.5), 3 (0.375)	6	NF	NF	NF	NF	NF	NF	NF	NF	NF	NF	NF	NF
Jan-15	15 meter	Ulva intestinalis	NF	NF	NF	NF	NF	NF	NF	NF	NF	NF	NF	NF	3 (3.0), 1 (0.375)	4	NF	NF	NF	NF
Jan-15	18 meter	Chaetomorpha spp.	NF	NF	NF	NF	NF	NF	1 (3.0), 2 (0.1875)	3	NF	NF	NF	NF	NF	NF	NF	NF	NF	NF
Jan-15	19 meter	Ulva intestinalis	NF	NF	NF	NF	NF	NF	NF	NF	1 (3.0), 3 (0.375)	4	NF	NF	NF	NF	NF	NF	NF	NF
Jan-15	21 meter	Chaetomorpha spp.	NF	NF	NF	NF	NF	NF	NF	NF	NF	NF	2 (3.0), 2 (0.375)	4	NF	NF	NF	NF	NF	NF
Jan-15	22 meter	Ulva intestinalis	NF	NF	NF	NF	NF	NF	NF	NF	NF	NF	3 (0.75)	3	NF	NF	NF	NF	NF	NF
Feb-15	2 meter	Chaetomorpha spp.	NF	NF	NF	NF	NF	NF	2 (3.0), 2 (0.1875)	4	NF	NF	NF	NF	NF	NF	2 (3.0), 3 (0.375)	5	NF	NF
Feb-15	2 meter	Ulva intestinalis	NF	NF	NF	NF	NF	NF	1 (3.0), 3 (0.375)	4	NF	NF	NF	NF	NF	NF	NF	NF	NF	NF
Feb-15	2 meter	Cladophora vagabunda	NF	NF	NF	NF	NF	NF	NF	NF	NF	NF	NF	NF	NF	NF	1 (3.0), 3 (0.75)	4	NF	NF
Feb-15	3 meter	Chaetomorpha spp.	2 (1.5), 2 (0.75)	4	NF	NF	NF	NF	NF	NF	NF	NF	NF	NF	NF	NF	NF	NF	NF	NF
Feb-15	3 meter	Ulva intestinalis	NF	NF	NF	NF	NF	NF	NF	NF	2 (1.5), 1 (0.375)	3	NF	NF	NF	NF	NF	NF	NF	NF
Feb-15	3 meter	Sargassum oligocystum	NF	NF	NF	NF	NF	NF	NF	NF	NF	NF	NF	NF	NF	NF	NF	NF	1 (3.0), 3 (0.375)	4
Feb-15	4 meter	Chaetomorpha spp.	NF	NF	2 (3.0), 7 (0.375)	9	NF	NF	NF	NF	NF	NF	NF	NF	NF	NF	NF	NF	NF	NF
Feb-15	4 meter	Gracilaria coronopifolia	NF	NF	NF	NF	NF	NF	2 (3.0), 3 (0.75)	5	NF	NF	NF	NF	NF	NF	NF	NF	NF	NF
Feb-15	4 meter	Amphiroa fragilissima	NF	NF	NF	NF	NF	NF	NF	NF	1 (3.0), 3 (0.375)	4	NF	NF	NF	NF	NF	NF	NF	NF
Feb-15	4 meter	Cladophora vagabunda	NF	NF	NF	NF	NF	NF	NF	NF	NF	NF	NF	NF	1 (3.0), 2 (0.1875)	3	NF	NF	2 (1.5), 1 (0.75)	3
Feb-15	4 meter	Ulva intestinalis	NF	NF	NF	NF	NF	NF	NF	NF	NF	NF	NF	NF	NF	NF	4 (1.5), 2 (0.1875)	6	NF	NF
Feb-15	5 meter	Acanthophora spicifera	NF	NF	NF	NF	2 (3.0), 2 (0.1875)	4	NF	NF	NF	NF	NF	NF	NF	NF	NF	NF	NF	NF
Feb-15	5 meter	Chaetomorpha spp.	NF	NF	NF	NF	NF	NF	NF	NF	2 (3.0), 5 (0.375)	7	NF	NF	2 (3.0), 3 (0.75)	5	NF	NF	3 (3.0), 3 (0.375)	6
Feb-15	5 meter	Chondrus crispus	NF	NF	NF	NF	NF	NF	NF	NF	3 (0.75)	3	NF	NF	NF	NF	NF	NF	NF	NF
Feb-15	6 meter	Amphiroa fragilissima	NF	NF	NF	NF	NF	NF	1 (3.0), 5 (0.375)	6	NF	NF	NF	NF	NF	NF	NF	NF	NF	NF
Feb-15	6 meter	Ulva intestinalis	NF	NF	NF	NF	NF	NF	NF	NF	NF	NF	2 (1.5), 1 90.375)	3	NF	NF	NF	NF	NF	NF
Feb-15	6 meter	Sargassum oligocystum	NF	NF	NF	NF	NF	NF	NF	NF	NF	NF	NF	NF	NF	NF	2 (3.0), 2 (0.1875)	4	NF	NF
Feb-15	7 meter	Cladophora stimpsonii	3 (0.75)	3	NF	NF	NF	NF	NF	NF	NF	NF	NF	NF	NF	NF	NF	NF	NF	NF
Feb-15	7 meter	Acanthophora spicifera	NF	NF	3 (1.5), 3 (0.375)	6	NF	NF	NF	NF	NF	NF	NF	NF	NF	NF	NF	NF	NF	NF
Feb-15	7 meter	Cladophora vagabunda	NF	NF	NF	NF	NF	NF	NF	NF	NF	NF	1 (3.0), 3 (0.375)	4	NF	NF	NF	NF	NF	NF
Feb-15	7 meter	Gracilaria coronopifolia	NF	NF	NF	NF	NF	NF	NF	NF	NF	NF	2 (3.0), 2 (0.1875)	4	NF	NF	NF	NF	NF	NF
Feb-15	8 meter	Hypnea spinella	NF	NF	2 (1.5), 1 (0.75)	3	NF	NF	NF	NF	NF	NF	NF	NF	NF	NF	NF	NF	NF	NF
Feb-15	8 meter	Ulva intestinalis	NF	NF	2 (3.0), 2 (0.1875)	4	NF	NF	NF	NF	NF	NF	NF	NF	NF	NF	NF	NF	NF	NF
Feb-15	8 meter	Padina minor	NF	NF	NF	NF	2 (0.1875)	2	NF	NF	NF	NF	NF	NF	NF	NF	NF	NF	NF	NF
Feb-15	8 meter	Cladophora vagabunda	NF	NF	NF	NF	NF	NF	NF	NF	NF	NF	NF	NF	NF	NF	2 (3.0), 3 (0.375)	5	NF	NF
Feb-15	9 meter	Acanthophora spicifera	2 (3.0), 3 (0.75), 2 (0.1875)	7	NF	NF	NF	NF	NF	NF	NF	NF	NF	NF	NF	NF	NF	NF	NF	NF
Feb-15	9 meter	Hypnea spinella	2 (3.0), 1 (1.5)	3	NF	NF	NF	NF	NF	NF	NF	NF	NF	NF	NF	NF	NF	NF	NF	NF
Feb-15	9 meter	Acetabularia acetabulum	NF	NF	NF	NF	1 (0.375)	1	NF	NF	NF	NF	NF	NF	NF	NF	NF	NF	NF	NF
Feb-15	9 meter	Gracilaria arcuata	NF	NF	NF	NF	NF	NF	2 (1.5), 1 (0.75)	3		NF	NF	NF	NF	NF	NF	NF	NF	NF
Feb-15	9 meter	Cladophora vagabunda	NF	NF	NF	NF	NF	NF	NF	NF	NF	NF	1 (3.0), 5 (0.375)	6	NF	NF	NF	NF	NF	NF
Feb-15	9 meter	Ulva intestinalis	NF	NF	NF	NF	NF	NF	NF	NF	NF	NF	NF	NF	1 (3.0), 5 (0.375)	6	NF	NF	NF	NF
Feb-15	9 meter	Sargassum paniculatum	NF	NF	NF	NF	NF	NF	NF	NF	NF	NF	NF	NF	NF	NF	NF	NF	1 (3.0), 3 (0.375)	4
Feb-15	10 meter	Gracilaria coronopifolia	NF	NF	1 (3.0), 3 (0.375)	4	NF	NF	NF	NF	NF	NF	NF	NF	NF	NF	NF	NF	NF	NF
Feb-15	10 meter	Ulva intestinalis	NF	NF	NF	NF	NF	NF	2 (3.0), 3 (0.75)	5	NF	NF	NF	NF	NF	NF	NF	NF	NF	NF
Feb-15	10 meter	Sargassum paniculatum	NF	NF	NF	NF	NF	NF	NF	NF	NF	NF	NF	NF	NF	NF	NF	NF	3 (1.5), 1 (0.75)	4
Feb-15	11 meter	Ulva intestinalis	NF	NF	NF	NF	2 (3.0), 3 (0.75)	5	NF	NF	NF	NF	NF	NF	NF	NF	NF	NF	NF	NF
Feb-15	11 meter	Valonia aegagropila	NF	NF	NF	NF	NF	NF	NF	NF	1 (3.0), 3 (0.375)	4	NF	NF	NF	NF	NF	NF	NF	NF
Feb-15	12 meter	Amphiroa fragilissima	3 (0.75)	3	NF	NF	NF	NF	NF	NF	NF	NF	NF	NF	NF	NF	NF	NF	NF	NF
Feb-15	12 meter	Ulva intestinalis	NF	NF	NF	NF	1 (3.0), 6 (1.5), 1 (0.75)	8	NF	NF	NF	NF	NF	NF	NF	NF	NF	NF	NF	NF
Feb-15	12 meter	Hypnea spinella	NF	NF	NF	NF	2 (1.5), 1 (0.75)	3	NF	NF	NF	NF	NF	NF	NF	NF	NF	NF	NF	NF
Feb-15	13 meter	Chaetomorpha spp.	NF	NF	NF	NF	NF	NF	NF	NF	NF	NF	2 (1.5), 1 (0.75)	3	NF	NF	NF	NF	NF	NF
Feb-15	13 meter	Ulva intestinalis	NF	NF	NF	NF	NF	NF	NF	NF	NF	NF	NF	NF	NF	NF	NF	NF	2 (3.0), 3 (0.375)	5
Feb-15	14 meter	Ulva intestinalis	NF	NF	NF	NF	NF	NF	NF	NF	1 (3.0), 5 (0.375)	6	NF	NF	NF	NF	NF	NF	NF	NF
Feb-15	14 meter	Chaetomorpha spp.	2 (1.5), 1 (0.75)	3	NF	NF	NF	NF	NF	NF	NF	NF	NF	NF	NF	NF	NF	NF	NF	NF
Feb-15	15 meter	Gracilaria coronopifolia	NF	NF	3 (0.75)	3	NF	NF	NF	NF	NF	NF	NF	NF	NF	NF	NF	NF	NF	NF
Feb-15	15 meter	Chaetomorpha spp.	NF	NF	3 (1.5)	3	NF	NF	NF	NF	NF	NF	NF	NF	NF	NF	NF	NF	NF	NF
Feb-15	15 meter	Ulva intestinalis	NF	NF	NF	NF	NF	NF	NF	NF	NF	NF	NF	NF	5 (1.5)	5	NF	NF	NF	NF
Feb-15	18 meter	Chaetomorpha spp.	NF	NF	NF	NF	NF	NF	1 (3.0), 2 (0.1875)	3	NF	NF	NF	NF	NF	NF	NF	NF	NF	NF
Feb-15	19 meter	Ulva intestinalis	NF	NF	NF	NF	NF	NF	NF	NF	3 (1.5)	3	NF	NF	NF	NF	NF	NF	NF	NF
Feb-15	21 meter	Chaetomorpha spp.	NF	NF	NF	NF	NF	NF	NF	NF	NF	NF	5 (1.5)	5	NF	NF	NF	NF	NF	NF
Feb-15	22 meter	Ulva intestinalis	NF	NF	NF	NF	NF	NF	NF	NF	NF	NF	1 (3.0), 2 (0.1875)	3	NF	NF	NF	NF	NF	NF
Mar-15	2 meter	Chaetomorpha spp.	NF	NF	NF	NF	NF	NF	5 (1.5)	5	NF	NF	NF	NF	NF	NF	2 (3.0), 2 (0.1875)	4	NF	NF
Mar-15	2 meter	Ulva intestinalis	NF	NF	NF	NF	NF	NF	1 (3.0), 7 (0.375)	8	NF	NF	NF	NF	NF	NF	NF	NF	NF	NF
Mar-15	3 meter	Chaetomorpha spp.	3 (1.5), 1 (0.75)	4	NF	NF	NF	NF	NF	NF	NF	NF	NF	NF	NF	NF	NF	NF	NF	NF
Mar-15	3 meter	Ulva intestinalis	NF	NF	NF	NF	NF	NF	NF	NF	3 (0.75)	3	NF	NF	NF	NF	NF	NF	NF	NF
Mar-15	3 meter	Sargassum oligocystum	NF	NF	NF	NF	NF	NF	NF	NF	NF	NF	NF	NF	NF	NF	NF	NF	3 (1.5), 3 (0.375)	6
Mar-15	4 meter	Chaetomorpha spp.	NF	NF	2 (3.0), 3 (0.75)	5	NF	NF	NF	NF	NF	NF	NF	NF	NF	NF	NF	NF	NF	NF
Mar-15	4 meter	Gracilaria coronopifolia	NF	NF	NF	NF	NF	NF	2 (3.0), 5 (0.375)	7	NF	NF	NF	NF	NF	NF	NF	NF	NF	NF
Mar-15	4 meter	Ulva intestinalis	NF	NF	NF	NF	NF	NF	NF	NF	NF	NF	NF	NF	NF	NF	2 (3.0), 5 (0.375)	7	NF	NF
Mar-15	5 meter	Ulva intestinalis	1 (3.0), 2 (0.1875)	3	NF	NF	NF	NF	NF	NF	NF	NF	NF	NF	NF	NF	NF	NF	NF	NF
Mar-15	5 meter	Acanthophora spicifera	2 (3.0), 5 (0.375)	7	NF	NF	NF	NF	NF	NF	NF	NF	NF	NF	NF	NF	NF	NF	NF	NF
Mar-15	5 meter	Chaetomorpha spp.	NF	NF	NF	NF	NF	NF	NF	NF	3 (1.5), 3 (0.375)	6	NF	NF	3 (3.0), 1 (0.375)	4	NF	NF	3 (3.0), 3 (0.75)	6
Mar-15	5 meter	Chondrus crispus	NF	NF	NF	NF	NF	NF	NF	NF	2 (1.5), 2 (0.75)	4	NF	NF	NF	NF	NF	NF	NF	NF
Mar-15	6 meter	Ulva intestinalis	NF	NF	NF	NF	NF	NF	NF	NF	NF	NF	3 (1.5), 1 (0.75)	4	NF	NF	NF	NF	NF	NF
Mar-15	6 meter	Sargassum oligocystum	NF	NF	NF	NF	NF	NF	NF	NF	NF	NF	NF	NF	NF	NF	5 (1.5)	5	NF	NF
Mar-15	7 meter	Acanthophora spicifera	NF	NF	2 (1.5), 2 (0.75)	4	NF	NF	NF	NF	NF	NF	NF	NF	NF	NF	NF	NF	NF	NF
Mar-15	7 meter	Chaetomorpha spp.	NF	NF	NF	NF	3 (0.75)	3	NF	NF	NF	NF	NF	NF	NF	NF	NF	NF	NF	NF
Mar-15	7 meter	Ulva intestinalis	NF	NF	NF	NF	NF	NF	NF	NF	2 (1.5), 1 (0.375)	3	NF	NF	NF	NF	NF	NF	NF	NF
Mar-15	7 meter	Gracilaria coronopifolia	NF	NF	NF	NF	NF	NF	NF	NF	5 (1.5)	5	NF	NF	NF	NF	NF	NF	NF	NF
Mar-15	8 meter	Ulva intestinalis	NF	NF	2 (1.5), 1 (0.75)	4	NF	NF	NF	NF	NF	NF	NF	NF	NF	NF	NF	NF	NF	NF
Mar-15	9 meter	Acanthophora spicifera	3 (1.5), 3 (0.375)	6	NF	NF	NF	NF	NF	NF	NF	NF	NF	NF	NF	NF	NF	NF	NF	NF
Mar-15	9 meter	Gracilaria arcuata	NF	NF	NF	NF	NF	NF	2 (3.0), 3 (0.75)	5	NF	NF	NF	NF	NF	NF	NF	NF	NF	NF
Mar-15	9 meter	Ulva intestinalis	NF	NF	NF	NF	NF	NF	NF	NF	NF	NF	NF	NF	2 (1.5), 1 (0.375)	3	NF	NF	NF	NF
Mar-15	9 meter	Sargassum paniculatum	NF	NF	NF	NF	NF	NF	NF	NF	NF	NF	NF	NF	NF	NF	NF	NF	2 (3.0), 3 (0.375)	5
Mar-15	10 meter	Gracilaria coronopifolia	NF	NF	2 (3.0), 2 (0.1875)	4	NF	NF	NF	NF	NF	NF	NF	NF	NF	NF	NF	NF	NF	NF
Mar-15	10 meter	Ulva intestinalis	NF	NF	NF	NF	NF	NF	2 (3.0), 3 (0.375), 1 (0.1875)	6	NF	NF	NF	NF	NF	NF	NF	NF	NF	NF
Mar-15	10 meter	Sargassum paniculatum	NF	NF	NF	NF	NF	NF	NF	NF	NF	NF	NF	NF	NF	NF	NF	NF	2 (3.0), 3 (0.75)	5
Mar-15	11 meter	Ulva intestinalis	NF	NF	NF	NF	3 (3.0), 1 (0.375)	4	NF	NF	NF	NF	NF	NF	NF	NF	NF	NF	NF	NF
Mar-15	12 meter	Acanthophora spicifera	NF	NF	NF	NF	2 (1.5), 2 (0.75)	4	NF	NF	NF	NF	NF	NF	NF	NF	NF	NF	NF	NF
Mar-15	12 meter	Gracilaria changii	NF	NF	NF	NF	NF	NF	NF	NF	1 (3.0), 5 (0.375)	6	NF	NF	NF	NF	NF	NF	NF	NF
Mar-15	12 meter	Sargassum oligocystum	NF	NF	NF	NF	NF	NF	NF	NF	NF	NF	NF	NF	2 (3.0), 2 (0.1875)	4	NF	NF	NF	NF
Mar-15	13 meter	Chaetomorpha spp.	NF	NF	NF	NF	NF	NF	NF	NF	NF	NF	2 (1.5), 2 (0.75)	4	NF	NF	NF	NF	NF	NF
Mar-15	13 meter	Ulva intestinalis	NF	NF	NF	NF	NF	NF	NF	NF	NF	NF	NF	NF	2 (3.0), 5 (0.375)	7	NF	NF	NF	NF
Mar-15	14 meter	Chaetomorpha spp.	2 (1.5), 1 (0.375)	3	NF	NF	NF	NF	NF	NF	NF	NF	NF	NF	NF	NF	NF	NF	NF	NF
Mar-15	14 meter	Ulva intestinalis	NF	NF	NF	NF	NF	NF	NF	NF	2 (1.5), 2 (0.75)	4	NF	NF	NF	NF	NF	NF	NF	NF
Mar-15	15 meter	Gracilaria coronopifolia	NF	NF	1 (3.0), 3 (0.375)	4	NF	NF	NF	NF	NF	NF	NF	NF	NF	NF	NF	NF	NF	NF
Mar-15	15 meter	Chaetomorpha spp.	NF	NF	NF	NF	2 (1.5), 1 (0.375)	3	NF	NF	NF	NF	NF	NF	NF	NF	NF	NF	NF	NF
Mar-15	15 meter	Ulva intestinalis	NF	NF	NF	NF	NF	NF	NF	NF	NF	NF	NF	NF	3 (3.0), 3 (0.75)	6	NF	NF	NF	NF
Mar-15	16 meter	Sargassum oligocystum	NF	NF	NF	NF	NF	NF	NF	NF	NF	NF	NF	NF	NF	NF	3 (1.5), 3 (0.375)	6	NF	NF
Mar-15	17 meter	Sargassum paniculatum	NF	NF	NF	NF	NF	NF	NF	NF	NF	NF	NF	NF	NF	NF	3 (3.0), 3 (0.75)	6	NF	NF
Mar-15	17 meter	Sargassum oligocystum	NF	NF	NF	NF	NF	NF	NF	NF	NF	NF	NF	NF	NF	NF	6 (3.0), 5 (0.375)	6	NF	NF
Mar-15	18 meter	Chaetomorpha spp.	NF	NF	NF	NF	NF	NF	3 (1.5), 1 (0.75)	4	NF	NF	NF	NF	NF	NF	NF	NF	NF	NF
Mar-15	18 meter	Sargassum paniculatum	NF	NF	NF	NF	NF	NF	NF	NF	NF	NF	NF	NF	NF	NF	NF	NF	4 (3.0), 2 (0.375)	6
Mar-15	19 meter	Ulva intestinalis	NF	NF	NF	NF	NF	NF	NF	NF	2 (1.5), 1 (0.375)	3	NF	NF	NF	NF	NF	NF	NF	NF
Mar-15	21 meter	Ulva intestinalis	NF	NF	NF	NF	NF	NF	NF	NF	NF	NF	2 (3.0), 2 (0.1875)	4	NF	NF	NF	NF	NF	NF
Apr-15	2 meter	Chaetomorpha spp.	NF	NF	NF	NF	NF	NF	2 (3.0), 2 (0.1875)	4	NF	NF	NF	NF	NF	NF	2 (3.0), 2 (0.1875)	4	NF	NF
Apr-15	2 meter	Ulva intestinalis	NF	NF	NF	NF	NF	NF	3 (1.5), 1 (0.75)	4	NF	NF	NF	NF	NF	NF	NF	NF	NF	NF
Apr-15	3 meter	Chaetomorpha spp.	2 (3.0), 3 (0.375)	5	NF	NF	NF	NF	NF	NF	NF	NF	NF	NF	NF	NF	NF	NF	NF	NF
Apr-15	3 meter	Ceratodictyon intricatum	NF	NF	NF	NF	NF	NF	NF	NF	3 (3.0), 1 (0.375)	4	NF	NF	NF	NF	NF	NF	NF	NF
Apr-15	3 meter	Sargassum oligocystum	NF	NF	NF	NF	NF	NF	NF	NF	NF	NF	NF	NF	NF	NF	NF	NF	3 (1.5), 3 (0.375)	6
Apr-15	4 meter	Chaetomorpha spp.	NF	NF	3 (3.0), 1 (0.375)	4	NF	NF	NF	NF	NF	NF	NF	NF	NF	NF	NF	NF	NF	NF
Apr-15	4 meter	Gracilaria coronopifolia	NF	NF	NF	NF	NF	NF	2 (3.0), 3 (0.375)	5	NF	NF	NF	NF	NF	NF	NF	NF	NF	NF
Apr-15	4 meter	Ceratodictyon intricatum	NF	NF	NF	NF	NF	NF	NF	NF	NF	NF	2 (3.0), 3 (0.75)	5	NF	NF	NF	NF	NF	NF
Apr-15	4 meter	Ulva intestinalis	NF	NF	NF	NF	NF	NF	NF	NF	NF	NF	NF	NF	NF	NF	3 (1.5), 3 (0.375)	6	NF	NF
Apr-15	5 meter	Acanthophora spicifera	NF	NF	NF	NF	3 (3.0), 1 (0.375)	4	NF	NF	NF	NF	NF	NF	NF	NF	NF	NF	NF	NF
Apr-15	5 meter	Chaetomorpha spp.	NF	NF	NF	NF	NF	NF	NF	NF	2 (3.0), 3 (0.75)	5	NF	NF	6 (1.5), 1 (0.75)	7	NF	NF	3 (3.0), 5 (0.375)	8
Apr-15	5 meter	Padina minor	NF	NF	NF	NF	NF	NF	NF	NF	NF	NF	3 (1.5), 3 (0.375)	6	3 (1.5), 1 (0.75)	4	NF	NF	NF	NF
Apr-15	6 meter	Ulva intestinalis	NF	NF	NF	NF	NF	NF	NF	NF	NF	NF	2 (3.0), 3 (0.375)	5	NF	NF	NF	NF	NF	NF
Apr-15	6 meter	Padina minor	NF	NF	NF	NF	4 (3.0), 2 (0.375)	6	NF	NF	NF	NF	NF	NF	NF	NF	NF	NF	NF	NF
Apr-15	6 meter	Sargassum oligocystum	NF	NF	NF	NF	NF	NF	NF	NF	NF	NF	NF	NF	NF	NF	2 (3.0), 3 (0.75)	5	NF	NF
Apr-15	7 meter	Padina minor	3 (1.5), 3 (0.375)	6	NF	NF	NF	NF	NF	NF	NF	NF	NF	NF	NF	NF	NF	NF	NF	NF
Apr-15	7 meter	Acanthophora spicifera	NF	NF	2 (1.5), 1 (0.375)	3	NF	NF	NF	NF	NF	NF	NF	NF	NF	NF	NF	NF	NF	NF
Apr-15	7 meter	Ulva intestinalis	NF	NF	NF	NF	NF	NF	NF	NF	1 (3.0), 3 (0.375)	4	NF	NF	NF	NF	NF	NF	NF	NF
Apr-15	7 meter	Gracilaria coronopifolia	NF	NF	NF	NF	NF	NF	NF	NF	NF	NF	2 (3.0), 2 (0.1875)	4	NF	NF	NF	NF	NF	NF
Apr-15	8 meter	Dictyota mertensi	2 (1.5), 1 (0.375)	6	NF	NF	NF	NF	NF	NF	NF	NF	NF	NF	NF	NF	NF	NF	NF	NF
Apr-15	8 meter	Ulva intestinalis	NF	NF	5 (1.5)	5	NF	NF	NF	NF	NF	NF	NF	NF	NF	NF	NF	NF	NF	NF
Apr-15	9 meter	Acanthophora spicifera	5 (1.5)	5	NF	NF	NF	NF	NF	NF	NF	NF	NF	NF	NF	NF	NF	NF	NF	NF
Apr-15	9 meter	Ulva intestinalis	NF	NF	NF	NF	NF	NF	NF	NF	NF	NF	NF	NF	1 (3.0), 3 (0.375)	4	NF	NF	3 (3.0), 3 (0.75)	6
Apr-15	10 meter	Padina minor	NF	NF	NF	NF	2 (3.0), 2 (0.1875)	4	2 (3.0), 3 (0.75)	5	NF	NF	NF	NF	NF	NF	NF	NF	NF	NF
Apr-15	10 meter	Sargassum paniculatum	NF	NF	NF	NF	NF	NF	NF	NF	NF	NF	NF	NF	NF	NF	NF	NF	6 (1.5), 1 (0.75)	7
Apr-15	11 meter	Ulva intestinalis	NF	NF	NF	NF	3 (3.0), 3 (0.75)	6	NF	NF	NF	NF	NF	NF	NF	NF	NF	NF	NF	NF
Apr-15	12 meter	Acanthophora spicifera	NF	NF	NF	NF	1 (3.0), 3 (0.375)	4	NF	NF	NF	NF	NF	NF	NF	NF	NF	NF	NF	NF
Apr-15	12 meter	Padina minor	NF	NF	NF	NF	NF	NF	NF	NF	NF	NF	2 (3.0, 3 (0.1875)	5	NF	NF	NF	NF	2 (3.0), 3 (0.375)	5
Apr-15	12 meter	Sargassum oligocystum	NF	NF	NF	NF	NF	NF	NF	NF	NF	NF	NF	NF	5 (1.5)	5	NF	NF	NF	NF
Apr-15	13 meter	Dictyota mertensi	NF	NF	NF	NF	2 (1.5), 1 (0.375)	3	NF	NF	NF	NF	NF	NF	NF	NF	NF	NF	NF	NF
Apr-15	13 meter	Chaetomorpha spp.	NF	NF	NF	NF	NF	NF	NF	NF	NF	NF	3 (1.5), 1 (0.75)	4	NF	NF	NF	NF	NF	NF
Apr-15	13 meter	Ulva intestinalis	NF	NF	NF	NF	NF	NF	NF	NF	NF	NF	NF	NF	NF	NF	NF	NF	2 (3.0), 2 (0.1875)	4
Apr-15	14 meter	Chaetomorpha spp.	2 (1.5), 1 (0.375)	3	NF	NF	NF	NF	NF	NF	NF	NF	NF	NF	NF	NF	NF	NF	NF	NF
Apr-15	14 meter	Ulva intestinalis	NF	NF	NF	NF	NF	NF	NF	NF	2 (1.5), 1 (0.375)	3	NF	NF	NF	NF	NF	NF	NF	NF
Apr-15	15 meter	Ulva intestinalis	NF	NF	NF	NF	NF	NF	NF	NF	NF	NF	NF	NF	3 (3.0), 3 (0.375)	6	NF	NF	NF	NF
Apr-15	16 meter	Padina minor	NF	NF	1 (3.0), 3 (0.375)	4	NF	NF	NF	NF	NF	NF	NF	NF	NF	NF	NF	NF	NF	NF
Apr-15	16 meter	Sargassum oligocystum	NF	NF	NF	NF	NF	NF	NF	NF	NF	NF	NF	NF	NF	NF	5 (1.5)	6	NF	NF
Apr-15	17 meter	Ceratodictyon intricatum	NF	NF	NF	NF	NF	NF	NF	NF	5 (3.0), 3 (0.1875)	8	NF	NF	NF	NF	NF	NF	NF	NF
Apr-15	17 meter	Sargassum paniculatum	NF	NF	NF	NF	NF	NF	NF	NF	NF	NF	NF	NF	NF	NF	4 (3.0), 5 (0.375)	9	NF	NF
Apr-15	17 meter	Sargassum oligocystum	NF	NF	NF	NF	NF	NF	NF	NF	NF	NF	NF	NF	NF	NF	7 (3.0), 3 (0.375)	10	NF	NF
Apr-15	18 meter	Chaetomorpha spp.	NF	NF	NF	NF	NF	NF	2 (3.0), 2 (0.1875)	4	NF	NF	NF	NF	NF	NF	NF	NF	NF	NF
Apr-15	18 meter	Sargassum paniculatum	NF	NF	NF	NF	NF	NF	NF	NF	NF	NF	NF	NF	NF	NF	NF	NF	4 (3.0), 1 (1.5)	5
Apr-15	21 meter	Chaetomorpha spp.	NF	NF	NF	NF	NF	NF	NF	NF	NF	NF	5 (1.5)	5	NF	NF	NF	NF	NF	NF
May-15	2 meter	Chaetomorpha spp.	NF	NF	NF	NF	NF	NF	5 (1.5)	6	NF	NF	NF	NF	NF	NF	2 (3.0), 2 (0.375)	4	NF	NF
May-15	2 meter	Ulva intestinalis	NF	NF	NF	NF	NF	NF	2 (3.0), 2 (0.1875)	4	NF	NF	NF	NF	NF	NF	NF	NF	NF	NF
May-15	3 meter	Chaetomorpha spp.	2 (3.0), 3 (0.75)	5	NF	NF	NF	NF	NF	NF	NF	NF	NF	NF	NF	NF	NF	NF	NF	NF
May-15	3 meter	Ceratodictyon intricatum	NF	NF	NF	NF	NF	NF	NF	NF	3 (3.0), 1 (0.375), 2 (0.1875)	6	NF	NF	NF	NF	NF	NF	NF	NF
May-15	3 meter	Sargassum oligocystum	NF	NF	NF	NF	NF	NF	NF	NF	NF	NF	NF	NF	NF	NF	NF	NF	2 (3.0), 3 (0.75)	5
May-15	4 meter	Chaetomorpha spp.	NF	NF	7 (1.5)	7	NF	NF	NF	NF	NF	NF	NF	NF	NF	NF	NF	NF	NF	NF
May-15	4 meter	Gracilaria changii	NF	NF	NF	NF	NF	NF	5 (1.5)	6	NF	NF	NF	NF	NF	NF	NF	NF	NF	NF
May-15	4 meter	Ceratodictyon intricatum	NF	NF	NF	NF	NF	NF	NF	NF	NF	NF	2 (3.0), 7 (0.375)	9	NF	NF	NF	NF	NF	NF
May-15	4 meter	Ulva intestinalis	NF	NF	NF	NF	NF	NF	NF	NF	NF	NF	NF	NF	NF	NF	2 (3.0), 2 (0.1875)	4	NF	NF
May-15	5 meter	Dictyota mertensi	2 (1.5), 1 (0.375)	3	NF	NF	NF	NF	NF	NF	NF	NF	NF	NF	NF	NF	NF	NF	NF	NF
May-15	5 meter	Acanthophora spicifera	NF	NF	NF	NF	2 (3.0), 3 (0.75)	5	NF	NF	NF	NF	NF	NF	NF	NF	NF	NF	NF	NF
May-15	5 meter	Acetabularia acetabulum	NF	NF	NF	NF	2 (0.75)	2	NF	NF	NF	NF	NF	NF	NF	NF	NF	NF	NF	NF
May-15	5 meter	Gracilaria changii	NF	NF	NF	NF	NF	NF	3 (1.5), 3 (0.375)	6	NF	NF	NF	NF	NF	NF	NF	NF	NF	NF
May-15	5 meter	Chaetomorpha spp.	NF	NF	NF	NF	NF	NF	NF	NF	3 (3.0), 1 (0.375)	4	NF	NF	2 (3.0), 7 (0.375)	9	NF	NF	3 (3.0), 3 (0.75)	6
May-15	5 meter	Padina minor	NF	NF	NF	NF	NF	NF	NF	NF	NF	NF	2 (3.0), 1 (0.75)	3	3 (1.5), 1 (0.75)	4	NF	NF	NF	NF
May-15	6 meter	Padina minor	NF	NF	NF	NF	5 (3.0), 4 (0.1875)	9	NF	NF	NF	NF	NF	NF	NF	NF	NF	NF	NF	NF
May-15	6 meter	Ulva intestinalis	NF	NF	NF	NF	NF	NF	NF	NF	NF	NF	2 (3.0), 3 (0.75)	5	NF	NF	NF	NF	NF	NF
May-15	6 meter	Sargassum oligocystum	NF	NF	NF	NF	NF	NF	NF	NF	NF	NF	NF	NF	NF	NF	3 (3.0), 1 (0.75)	4	NF	NF
May-15	7 meter	Padina minor	2 (3.0), 1 (0.74)	3	NF	NF	NF	NF	NF	NF	NF	NF	NF	NF	NF	NF	NF	NF	NF	NF
May-15	7 meter	Acanthophora spicifera	NF	NF	3 (1.5)	3	NF	NF	NF	NF	NF	NF	NF	NF	NF	NF	NF	NF	NF	NF
May-15	7 meter	Ulva intestinalis	NF	NF	NF	NF	NF	NF	NF	NF	3 (1.5), 3 (0.375)	6	NF	NF	NF	NF	NF	NF	NF	NF
May-15	7 meter	Gracilaria changi	NF	NF	NF	NF	NF	NF	NF	NF	NF	NF	2 (3.0), 3 (0.375)	5	NF	NF	NF	NF	NF	NF
May-15	8 meter	Dictyopteris delicatula	3 (1.5), 1 (0.75)	4	NF	NF	NF	NF	NF	NF	NF	NF	NF	NF	NF	NF	NF	NF	NF	NF
May-15	8 meter	Ulva intestinalis	NF	NF	2 (3.0), 3 (0.375)	5	NF	NF	NF	NF	NF	NF	NF	NF	NF	NF	NF	NF	NF	NF
May-15	8 meter	Gracilaria changii	NF	NF	NF	NF	NF	NF	1 (3.0), 1 (0.75)	2	NF	NF	NF	NF	NF	NF	NF	NF	NF	NF
May-15	9 meter	Acanthophora spicifera	5 (1.5)	6	NF	NF	NF	NF	NF	NF	NF	NF	NF	NF	NF	NF	NF	NF	NF	NF
May-15	9 meter	Acetabularia acetabulum	3 (0.75)	3	NF	NF	NF	NF	NF	NF	NF	NF	NF	NF	NF	NF	NF	NF	NF	NF
May-15	9 meter	Sargassum paniculatum	NF	NF	NF	NF	NF	NF	NF	NF	NF	NF	NF	NF	NF	NF	NF	NF	3 (3.0), 2 (0.1875)	5
May-15	9 meter	Ulva intestinalis	NF	NF	NF	NF	NF	NF	NF	NF	NF	NF	NF	NF	3 (1.5)	3	NF	NF	NF	NF
May-15	9 meter	Sargassum paniculatum	NF	NF	NF	NF	NF	NF	NF	NF	NF	NF	NF	NF	NF	NF	NF	NF	7 (1.5)	7
May-15	10 meter	Padina minor	NF	NF	NF	NF	5 (1.5)	6	NF	NF	NF	NF	NF	NF	NF	NF	NF	NF	NF	NF
May-15	10 meter	Ulva intestinalis	NF	NF	NF	NF	NF	NF	2 (3.0), 3 (0.375)	5	NF	NF	NF	NF	NF	NF	NF	NF	NF	NF
May-15	10 meter	Gelidiella acerosa	NF	NF	NF	NF	NF	NF	2 (3.0), 2 (0.1875)	4	NF	NF	NF	NF	NF	NF	NF	NF	NF	NF
May-15	10 meter	Sargassum paniculatum	NF	NF	NF	NF	NF	NF	NF	NF	NF	NF	NF	NF	NF	NF	NF	NF	3 (3.0), 1 (0.75)	4
May-15	11 meter	Ulva intestinalis	NF	NF	NF	NF	3 (3.0), 3 (0.75)	6	NF	NF	NF	NF	NF	NF	NF	NF	NF	NF	NF	NF
May-15	11 meter	Sargassum oligocystum	NF	NF	NF	NF	NF	NF	2 (3.0), 3 (0.75)	5	NF	NF	NF	NF	NF	NF	NF	NF	NF	NF
May-15	11 meter	Sargassum paniculatum	NF	NF	NF	NF	NF	NF	3 (3.0), 1 (0.375)	4	NF	NF	NF	NF	NF	NF	NF	NF	NF	NF
May-15	12 meter	Dictyota mertensi	NF	NF	2 (1.5), 1 (0.375)	3	NF	NF	NF	NF	NF	NF	NF	NF	NF	NF	NF	NF	NF	NF
May-15	12 meter	Acanthophora spicifera	NF	NF	NF	NF	1 (3.0), 3 (0.375)	4	NF	NF	NF	NF	NF	NF	NF	NF	NF	NF	NF	NF
May-15	12 meter	Sargassum oligocystum	NF	NF	NF	NF	NF	NF	NF	NF	3 (1.5)	3	NF	NF	2 (3.0), 2 (0.1875)	4	NF	NF	NF	NF
May-15	12 meter	Sargassum paniculatum	NF	NF	NF	NF	NF	NF	NF	NF	3 (1.5), 3 (0.375)	6	NF	NF	NF	NF	NF	NF	NF	NF
May-15	12 meter	Padina minor	NF	NF	NF	NF	NF	NF	NF	NF	NF	NF	5 (1.5)	6	NF	NF	2 (3.0), 3 (0.375)	5	NF	NF
May-15	13 meter	Dictyota mertensi	NF	NF	NF	NF	3 (1.5)	3	NF	NF	NF	NF	NF	NF	NF	NF	NF	NF	NF	NF
May-15	13 meter	Chaetomorpha spp.	NF	NF	NF	NF	NF	NF	NF	NF	NF	NF	3 (1.5), 3 (0.375)	6	NF	NF	NF	NF	NF	NF
May-15	13 meter	Ulva intestinalis	NF	NF	NF	NF	NF	NF	NF	NF	NF	NF	NF	NF	NF	NF	NF	NF	5 (1.5)	6
May-15	14 meter	Chaetomorpha spp.	3 (1.5)	3	NF	NF	NF	NF	NF	NF	NF	NF	NF	NF	NF	NF	NF	NF	NF	NF
May-15	14 meter	Ulva intestinalis	NF	NF	NF	NF	NF	NF	NF	NF	3 (1.5), 1 (0.75)	4	NF	NF	NF	NF	NF	NF	NF	NF
May-15	15 meter	Padina minor	NF	NF	NF	NF	NF	NF	7 (1.5)	7	3 (1.5), 1 (0.75)	4	NF	NF	NF	NF	NF	NF	NF	NF
May-15	15 meter	Ulva intestinalis	NF	NF	NF	NF	NF	NF	NF	NF	NF	NF	NF	NF	3 (3.0), 3 (0.75)	6	NF	NF	NF	NF
May-15	16 meter	Padina minor	NF	NF	1 (3.0), 1 (0.75)	2	NF	NF	NF	NF	NF	NF	NF	NF	NF	NF	NF	NF	NF	NF
May-15	16 meter	Sargassum oligocystum	NF	NF	NF	NF	NF	NF	NF	NF	NF	NF	NF	NF	NF	NF	2 (3.0), 2 (0.1875)	4	NF	NF
May-15	17 meter	Padina minor	NF	NF	3 (1.5), 3 (0.375)	6	NF	NF	NF	NF	5 (3.0), 3 (0.1875)	8	NF	NF	NF	NF	NF	NF	NF	NF
May-15	17 meter	Sargassum paniculatum	NF	NF	NF	NF	NF	NF	NF	NF	NF	NF	NF	NF	NF	NF	4 (3.0), 3 (0.75)	7	NF	NF
May-15	17 meter	Sargassum oligocystum	NF	NF	NF	NF	NF	NF	NF	NF	NF	NF	NF	NF	NF	NF	6 (3.0), 3 (0.375)	9	NF	NF
May-15	18 meter	Chaetomorpha spp.	NF	NF	NF	NF	NF	NF	5 (1.5)	6	NF	NF	NF	NF	NF	NF	NF	NF	NF	NF
May-15	18 meter	Sargassum paniculatum	NF	NF	NF	NF	NF	NF	NF	NF	NF	NF	NF	NF	NF	NF	NF	NF	4 (3.0), 3 (0.1875)	7
May-15	21 meter	Chaetomorpha spp.	NF	NF	NF	NF	NF	NF	NF	NF	NF	NF	2 (3.0), 3 (0.375)	5	NF	NF	NF	NF	NF	NF
Jun-15	2 meter	Chaetomorpha spp.	NF	NF	NF	NF	NF	NF	2 (3.0), 3 (0.375)	5	NF	NF	NF	NF	NF	NF	2 (3.0), 2 (0.1875)	4	NF	NF
Jun-15	2 meter	Ulva intestinalis	NF	NF	NF	NF	NF	NF	3 (1.5), 1 (0.75)	4	NF	NF	NF	NF	NF	NF	NF	NF	NF	NF
Jun-15	3 meter	Chaetomorpha spp.	2 (3.0), 7 (0.375)	9	NF	NF	NF	NF	NF	NF	NF	NF	NF	NF	NF	NF	NF	NF	NF	NF
Jun-15	3 meter	Ceratodictyon intricatum	NF	NF	NF	NF	NF	NF	NF	NF	1 (3.0), 3 (0.375)	4	NF	NF	NF	NF	NF	NF	NF	NF
Jun-15	3 meter	Dictyota mertensi	NF	NF	NF	NF	NF	NF	NF	NF	3 (1.5), 1 (0.75)	4	NF	NF	NF	NF	NF	NF	NF	NF
Jun-15	3 meter	Sargassum oligocystum	NF	NF	NF	NF	NF	NF	NF	NF	NF	NF	NF	NF	NF	NF	NF	NF	5 (1.5)	6
Jun-15	4 meter	Chaetomorpha spp.	NF	NF	3 (3.0), 3 (0.75)	6	NF	NF	NF	NF	NF	NF	NF	NF	NF	NF	NF	NF	NF	NF
Jun-15	4 meter	Ceratodictyon intricatum	NF	NF	NF	NF	NF	NF	NF	NF	NF	NF	3 (3.0), 1 (0.75)	4	NF	NF	NF	NF	NF	NF
Jun-15	4 meter	Ulva intestinalis	NF	NF	NF	NF	NF	NF	NF	NF	NF	NF	NF	NF	NF	NF	2 (3.0), 3 (0.375)	5	NF	NF
Jun-15	5 meter	Dictyota mertensi	3 (1.5)	3	NF	NF	NF	NF	NF	NF	NF	NF	NF	NF	NF	NF	NF	NF	NF	NF
Jun-15	5 meter	Acanthophora spicifera	NF	NF	NF	NF	2 (1.5), 1 (0.75)	3	NF	NF	NF	NF	NF	NF	NF	NF	NF	NF	NF	NF
Jun-15	5 meter	Acetabularia acetabulum	NF	NF	NF	NF	3 (0.75)	3	NF	NF	NF	NF	NF	NF	NF	NF	NF	NF	NF	NF
Jun-15	5 meter	Chaetomorpha spp.	NF	NF	NF	NF	NF	NF	NF	NF	3 (3.0), 1 (0.75)	4	NF	NF	3 (3.0), 1 (0.75)	4	NF	NF	7 (1.5)	7
Jun-15	5 meter	Padina minor	NF	NF	NF	NF	NF	NF	NF	NF	NF	NF	2 (3.0), 3 (0.375)	5	3 (1.5), 3 (0.375)	6	NF	NF	NF	NF
Jun-15	6 meter	Padina minor	NF	NF	NF	NF	4 (3.0), 3 (0.75)	7	NF	NF	NF	NF	NF	NF	NF	NF	NF	NF	NF	NF
Jun-15	6 meter	Ulva intestinalis	NF	NF	NF	NF	NF	NF	NF	NF	NF	NF	3 (1.5), 3 (0.375)	6	NF	NF	NF	NF	NF	NF
Jun-15	6 meter	Sargassum oligocystum	NF	NF	NF	NF	NF	NF	NF	NF	NF	NF	NF	NF	NF	NF	3 (3.0), 1 (0.75)	4	NF	NF
Jun-15	7 meter	Padina minor	2 (3.0), 3 (0.375)	5	NF	NF	NF	NF	NF	NF	NF	NF	NF	NF	NF	NF	NF	NF	NF	NF
Jun-15	7 meter	Ulva intestinalis	NF	NF	NF	NF	NF	NF	NF	NF	3 (1.5), 1 (0.75)	4	NF	NF	NF	NF	NF	NF	NF	NF
Jun-15	7 meter	Dictyota dichotoma	NF	NF	NF	NF	NF	NF	NF	NF	NF	NF	NF	NF	NF	NF	1 (0.75)	1	NF	NF
Jun-15	8 meter	Dictyopteris delicatula	3 (0.75)	3	NF	NF	NF	NF	NF	NF	NF	NF	NF	NF	NF	NF	NF	NF	NF	NF
Jun-15	8 meter	Ulva intestinalis	NF	NF	2 (3.0), 2 (0.1875)	4	NF	NF	NF	NF	NF	NF	NF	NF			NF	NF	NF	NF
Jun-15	8 meter	Dictyota dichotoma	NF	NF	NF	NF	NF	NF	NF	NF	NF	NF	NF	NF	1 (1.5), 1 (0.1875)	2	NF	NF	NF	NF
Jun-15	8 meter	Sargassum paniculatum	NF	NF	NF	NF	NF	NF	NF	NF	NF	NF	NF	NF	NF	NF	NF	NF	2 (3.0), 3 (0.75)	5
Jun-15	9 meter	Acanthophora spicifera	3 (0.75)	3	NF	NF	NF	NF	NF	NF	NF	NF	NF	NF	NF	NF	NF	NF	NF	NF
Jun-15	9 meter	Acetabularia acetabulum	3 (1.5)	3	NF	NF	NF	NF	NF	NF	NF	NF	NF	NF	NF	NF	NF	NF	NF	NF
Jun-15	9 meter	Ulva intestinalis	NF	NF	NF	NF	NF	NF	NF	NF	NF	NF	NF	NF	1 (3.0), 2 (0.375)	3	NF	NF	NF	NF
Jun-15	9 meter	Sargassum paniculatum	NF	NF	NF	NF	NF	NF	NF	NF	NF	NF	NF	NF	NF	NF	NF	NF	2 (3.0), 3 (0.75)	6
Jun-15	10 meter	Padina minor	NF	NF	NF	NF	3 (1.5), 3 (0.375)	6	NF	NF	NF	NF	NF	NF	NF	NF	NF	NF	NF	NF
Jun-15	10 meter	Ulva intestinalis	NF	NF	NF	NF	NF	NF	5 (1.5)	6	NF	NF	NF	NF	1 (3.0), 2 (0.375)	3	NF	NF	NF	NF
Jun-15	10 meter	Ceratodictyon intricatum	NF	NF	NF	NF	NF	NF	3 (1.5), 3 (0.375)	6	NF	NF	NF	NF	NF	NF	NF	NF	NF	NF
Jun-15	10 meter	Sargassum paniculatum	NF	NF	NF	NF	NF	NF	NF	NF	NF	NF	NF	NF	NF	NF	NF	NF	3 (3.0), 2 (0.1875)	5
Jun-15	11 meter	Ulva intestinalis	NF	NF	NF	NF	4 (3.0), 1 (0.75)	5	NF	NF	NF	NF	NF	NF	NF	NF	NF	NF	NF	NF
Jun-15	11 meter	Sargassum oligocystum	NF	NF	NF	NF	NF	NF	3 (3.0), 1 (0.75)	4	NF	NF	NF	NF	NF	NF	NF	NF	NF	NF
Jun-15	11 meter	Sargassum paniculatum	NF	NF	NF	NF	NF	NF	2 (3.0), 7 (0.375)	9	NF	NF	NF	NF	NF	NF	NF	NF	NF	NF
Jun-15	12 meter	Dictyota mertensi	NF	NF	1 (3.0), 3 (0.375)	4	NF	NF	NF	NF	NF	NF	NF	NF	NF	NF	NF	NF	NF	NF
Jun-15	12 meter	Sargassum oligocystum	NF	NF	NF	NF	NF	NF	NF	NF	2 (3.0), 2 (0.1875)	4	NF	NF	2 (3.0), 3 (0.75)	5	NF	NF	NF	NF
Jun-15	12 meter	Sargassum paniculatum	NF	NF	NF	NF	NF	NF	NF	NF	3 (1.5), 3 (0.375)	6	NF	NF	NF	NF	NF	NF	NF	NF
Jun-15	12 meter	Padina minor	NF	NF	NF	NF	NF	NF	NF	NF	NF	NF	5 (1.5)	6	NF	NF	3 (3.0), 1 (0.75)	4	NF	NF
Jun-15	13 meter	Gracilaria bursa-pastoris	1 (1.5)	1	NF	NF	NF	NF	NF	NF	NF	NF	NF	NF	NF	NF	NF	NF	NF	NF
Jun-15	13 meter	Chaetomorpha spp.	NF	NF	NF	NF	NF	NF	NF	NF	NF	NF	2 (3.0), 2 (0.1875)	4	NF	NF	NF	NF	NF	NF
Jun-15	13 meter	Ulva intestinalis	NF	NF	NF	NF	NF	NF	NF	NF	NF	NF	NF	NF	NF	NF	NF	NF	2 (3.0), 3 (0.75)	5
Jun-15	14 meter	Chaetomorpha spp.	3 (1.5), 3 (0.375)	6	NF	NF	NF	NF	NF	NF	NF	NF	NF	NF	NF	NF	NF	NF	NF	NF
Jun-15	14 meter	Ulva intestinalis	NF	NF	NF	NF	NF	NF	NF	NF	2 (3.0), 3 (0.375)	5	NF	NF	NF	NF	NF	NF	NF	NF
Jun-15	15 meter	Padina minor	NF	NF	2 (3.0), 2 (0.1875)	4	NF	NF	3 (3.0), 3 (0.75)	6	2 (3.0), 2 (0.1875)	4	NF	NF	NF	NF	NF	NF	NF	NF
Jun-15	15 meter	Ulva intestinalis	NF	NF	NF	NF	NF	NF	NF	NF	NF	NF	NF	NF	5 (1.5), 3 (0.75)	8	NF	NF	NF	NF
Jun-15	16 meter	Padina minor	NF	NF	2 (3.0), 7 (0.375)	4	NF	NF	NF	NF	NF	NF	NF	NF	NF	NF	NF	NF	NF	NF
Jun-15	16 meter	Sargassum oligocystum	NF	NF	NF	NF	NF	NF	NF	NF	NF	NF	NF	NF	NF	NF	3 (1.5), 1 (0.75)	4	NF	NF
Jun-15	17 meter	Ceratodictyon intricatum	NF	NF	NF	NF	NF	NF	NF	NF	4 (3.0), 5 (0.375)	9	NF	NF	NF	NF	NF	NF	NF	NF
Jun-15	17 meter	Sargassum oligocystum	NF	NF	NF	NF	NF	NF	NF	NF	NF	NF	NF	NF	NF	NF	4 (3.0), 2 (0.375)	6	NF	NF
Jun-15	17 meter	Sargassum paniculatum	NF	NF	NF	NF	NF	NF	NF	NF	NF	NF	NF	NF	NF	NF	4 (3.0), 3 (0.75)	7	NF	NF
Jun-15	18 meter	Sargassum paniculatum	NF	NF	NF	NF	NF	NF	NF	NF	NF	NF	NF	NF	NF	NF	NF	NF	3 (3.0), 3 (0.375), 1 (0.1875)	7
Jun-15	21 meter	Chaetomorpha spp.	NF	NF	NF	NF	NF	NF	NF	NF	NF	NF	3 (1.5), 3 (0.375)	6	NF	NF	NF	NF	NF	NF
Jul-15	2 meter	Chaetomorpha spp.	NF	NF	NF	NF	NF	NF	2 (3.0), 3 (0.375)	5	NF	NF	NF	NF	NF	NF	5 (1.5)	6	NF	NF
Jul-15	2 meter	Ulva intestinalis	NF	NF	NF	NF	NF	NF	2 (3.0), 2 (0.1875)	4	NF	NF	NF	NF	NF	NF	NF	NF	NF	NF
Jul-15	3 meter	Chaetomorpha spp.	4 (1.5), 5 (0.375)	9	NF	NF	NF	NF	NF	NF	NF	NF	NF	NF	NF	NF	NF	NF	NF	NF
Jul-15	3 meter	Galaxaura rugosa	NF	NF	NF	NF	3 (0.75)	3	NF	NF	NF	NF	1 (3.0), 1 (0.375)	2	NF	NF	NF	NF	NF	NF
Jul-15	3 meter	Ceratodictyon intricatum	NF	NF	NF	NF	NF	NF	NF	NF	3 (0.75)	3	NF	NF	NF	NF	NF	NF	NF	NF
Jul-15	3 meter	Dictyota mertensi	NF	NF	NF	NF	NF	NF	NF	NF	3 (0.75)	3	NF	NF	NF	NF	NF	NF	NF	NF
Jul-15	3 meter	Sargassum oligocystum	NF	NF	NF	NF	NF	NF	NF	NF	NF	NF	NF	NF	NF	NF	NF	NF	2 (3.0), 1 (0.75)	3
Jul-15	4 meter	Chaetomorpha spp.	NF	NF	4 (3.0), 2 (0.375)	6	NF	NF	NF	NF	NF	NF	NF	NF	NF	NF	NF	NF	NF	NF
Jul-15	4 meter	Caulerpa racemosa	NF	NF	NF	NF	NF	NF	NF	NF	NF	NF	3 (3.0), 1 (0.75)	4	NF	NF	NF	NF	NF	NF
Jul-15	4 meter	Ulva intestinalis	NF	NF	NF	NF	NF	NF	NF	NF	NF	NF	NF	NF	NF	NF	2 (3.0), 5 (0.1875)	7	NF	NF
Jul-15	5 meter	Sargassum oligocystum	NF	NF	NF	NF	NF	NF	3 (1.5), 3 (0.375)	6	NF	NF	NF	NF	NF	NF	NF	NF	NF	NF
Jul-15	5 meter	Sargassum microcystum	NF	NF	NF	NF	NF	NF	1 (3.0), 3 (0.375)	4	NF	NF	NF	NF	NF	NF	NF	NF	NF	NF
Jul-15	5 meter	Chaetomorpha spp.	NF	NF	NF	NF	NF	NF	NF	NF	3 (3.0), 1 (0.375)	4	NF	NF	NF	NF	NF	NF	NF	NF
Jul-15	5 meter	Sargassum paniculatum	NF	NF	NF	NF	NF	NF	NF	NF	1 (3.0), 1 (0.375)	2	NF	NF	NF	NF	NF	NF	NF	NF
Jul-15	5 meter	Padina minor	NF	NF	NF	NF	NF	NF	NF	NF	NF	NF	2 (3.0), 3 (0.375)	5	3 (1.5)	3	NF	NF	NF	NF
Jul-15	5 meter	Chaetomorpha spp.	NF	NF	NF	NF	NF	NF	NF	NF	NF	NF	NF	NF	2 (3.0), 3 (0.75)	5	NF	NF	NF	NF
Jul-15	6 meter	Galaxaura rugosa	NF	NF	2 (1.5), 5 (0.375)	7	NF	NF	NF	NF	NF	NF	NF	NF	NF	NF	NF	NF	NF	NF
Jul-15	6 meter	Sargassum oligocystum	NF	NF	3 (1.5), 3 (0.375)	6	NF	NF	NF	NF	NF	NF	NF	NF	NF	NF	3 (3.0), 1 (1.5)	4	NF	NF
Jul-15	6 meter	Padina minor	NF	NF	NF	NF	3 (3.0), 1 (0.75)	4	NF	NF	NF	NF	NF	NF	NF	NF	NF	NF	NF	NF
Jul-15	6 meter	Acanthophora muscoides	NF	NF	NF	NF	2 (3.0), 3 (0.375)	5	NF	NF	NF	NF	NF	NF	NF	NF	NF	NF	NF	NF
Jul-15	6 meter	Caulerpa racemosa	NF	NF	NF	NF	NF	NF	5 (1.5)	6	NF	NF	NF	NF	NF	NF	NF	NF	NF	NF
Jul-15	6 meter	Ulva intestinalis	NF	NF	NF	NF	NF	NF	NF	NF	NF	NF	1 (3.0), 3 (0.375)	4	NF	NF	NF	NF	NF	NF
Jul-15	7 meter	Padina minor	2 (3.0), 2 (0.1875)	4	NF	NF	NF	NF	NF	NF	NF	NF	NF	NF	NF	NF	NF	NF	NF	NF
Jul-15	7 meter	Ulva intestinalis	NF	NF	NF	NF	NF	NF	NF	NF	3 (1.5)	3	NF	NF	NF	NF	NF	NF	NF	NF
Jul-15	7 meter	Dictyota dichotoma	NF	NF	NF	NF	NF	NF	NF	NF	NF	NF	NF	NF	NF	NF	2 (0.1875)	2	NF	NF
Jul-15	8 meter	Dictyota divaricata	3 (0.75)	3	NF	NF	NF	NF	NF	NF	NF	NF	NF	NF	3 (0.75)	3	NF	NF	NF	NF
Jul-15	8 meter	Ulva intestinalis	NF	NF	3 (1.5), 3 (0.375)	6	NF	NF	NF	NF	NF	NF	NF	NF	NF	NF	NF	NF	NF	NF
Jul-15	8 meter	Acanthophora muscoides	NF	NF	2 (1.5), 5 (0.375)	7	NF	NF	NF	NF	NF	NF	NF	NF	NF	NF	NF	NF	NF	NF
Jul-15	8 meter	Sargassum oligocystum	NF	NF	NF	NF	5 (1.5)	6	NF	NF	NF	NF	NF	NF	NF	NF	NF	NF	NF	NF
Jul-15	8 meter	Sargassum paniculatum	NF	NF	NF	NF	NF	NF	NF	NF	NF	NF	NF	NF	NF	NF	NF	NF	3 (3.0), 1 (0.375)	4
Jul-15	8 meter	Sargassum microcystum	NF	NF	NF	NF	NF	NF	NF	NF	NF	NF	NF	NF	NF	NF	NF	NF	1 (3.0), 3 (0.375)	4
Jul-15	9 meter	Acetabularia acetabulum	3 (1.5), 3 (0.375)	6	NF	NF	NF	NF	NF	NF	NF	NF	NF	NF	NF	NF	NF	NF	NF	NF
Jul-15	9 meter	Polysiphonia coacta	NF	NF	NF	NF	NF	NF	NF	NF	NF	NF	1 (0.375)	1	NF	NF	NF	NF	NF	NF
Jul-15	9 meter	Sargassum microcystum	NF	NF	NF	NF	NF	NF	NF	NF	NF	NF	NF	NF	NF	NF	1 (3.0), 1 (0.75)	2	NF	NF
Jul-15	9 meter	Sargassum paniculatum	NF	NF	NF	NF	NF	NF	NF	NF	NF	NF	NF	NF	NF	NF	NF	NF	3 (3.0), 3 (0.75)	6
Jul-15	10 meter	Sargassum microcystum	1 (3.0), 1 (0.75)	2	NF	NF	NF	NF	NF	NF	NF	NF	NF	NF	NF	NF	NF	NF	NF	NF
Jul-15	10 meter	Padina minor	NF	NF	NF	NF	3 (1.5)	3	NF	NF	NF	NF	NF	NF	NF	NF	NF	NF	NF	NF
Jul-15	10 meter	Acetabularia acetabulum	NF	NF	NF	NF	2 (1.5), 1 (0.75)	3	NF	NF	NF	NF	NF	NF	NF	NF	NF	NF	NF	NF
Jul-15	10 meter	Ulva intestinalis	NF	NF	NF	NF	NF	NF	2 (3.0), 3 (0.375)	5	NF	NF	NF	NF	NF	NF	NF	NF	NF	NF
Jul-15	10 meter	Gelidiella acerosa	NF	NF	NF	NF	NF	NF	3 (0.75)	3	NF	NF	NF	NF	NF	NF	NF	NF	NF	NF
Jul-15	10 meter	Sargassum paniculatum	NF	NF	NF	NF	NF	NF	NF	NF	NF	NF	NF	NF	NF	NF	NF	NF	2 (3.0), 3 (0.75)	5
Jul-15	11 meter	Ulva intestinalis	NF	NF	NF	NF	7 (1.5)	7	NF	NF	NF	NF	NF	NF	NF	NF	NF	NF	NF	NF
Jul-15	11 meter	Sargassum oligocystum	NF	NF	NF	NF	NF	NF	3 (3.0), 3 (0.75)	6	NF	NF	NF	NF	NF	NF	NF	NF	NF	NF
Jul-15	11 meter	Sargassum paniculatum	NF	NF	NF	NF	NF	NF	3 (3.0), 1 (0.375)	4	NF	NF	NF	NF	NF	NF	NF	NF	NF	NF
Jul-15	12 meter	Dictyota mertensi	NF	NF	1 (3.0), 1 (0.75)	2	NF	NF	NF	NF	NF	NF	NF	NF	NF	NF	NF	NF	NF	NF
Jul-15	12 meter	Galaxaura rugosa	NF	NF	3 (0.75)	3	NF	NF	NF	NF	NF	NF	NF	NF	NF	NF	NF	NF	NF	NF
Jul-15	12 meter	Sargassum oligocystum	NF	NF	NF	NF	NF	NF	NF	NF	5 (1.5)	6	NF	NF	5 (1.5)	6	NF	NF	NF	NF
Jul-15	12 meter	Sargassum paniculatum	NF	NF	NF	NF	NF	NF	NF	NF	2 (3.0), 2 (0.1875)	4	NF	NF	NF	NF	NF	NF	NF	NF
Jul-15	12 meter	Padina minor	NF	NF	NF	NF	NF	NF	NF	NF	NF	NF	2 (3.0), 2 (0.1875)	4	NF	NF	3 (4.5)	3	NF	NF
Jul-15	12 meter	Ulva intestinalis	NF	NF	NF	NF	NF	NF	NF	NF	NF	NF	NF	NF	NF	NF	NF	NF	2 (3.0), 2 (0.1875)	4
Jul-15	12 meter	Sargassum tenerrimum	NF	NF	NF	NF	NF	NF	NF	NF	NF	NF	NF	NF	NF	NF	NF	NF	1 (3.0), 3 (0.75)	5
Jul-15	13 meter	Chaetomorpha spp.	NF	NF	NF	NF	NF	NF	NF	NF	NF	NF	5 (1.5)	5	NF	NF	NF	NF	NF	NF
Jul-15	14 meter	Chaetomorpha spp.	5 (1.5)	5	NF	NF	NF	NF	NF	NF	NF	NF	NF	NF	NF	NF	NF	NF	NF	NF
Jul-15	14 meter	Sargassum polycystum	NF	NF	NF	NF	1 (3.0), 2 (0.1875)	3	NF	NF	NF	NF	NF	NF	NF	NF	NF	NF	NF	NF
Jul-15	14 meter	Sargassum microcystum	NF	NF	NF	NF	NF	NF	NF	NF	NF	NF	NF	NF	NF	NF	2 (3.0), 1 (0.75)	3	NF	NF
Jul-15	14 meter	Sargassum tenerrimum	NF	NF	NF	NF	NF	NF	NF	NF	NF	NF	NF	NF	NF	NF	3 (0.75)	3	NF	NF
Jul-15	15 meter	Padina minor	NF	NF	NF	NF	NF	NF	5 (1.5)	6	NF	NF	NF	NF	NF	NF	NF	NF	NF	NF
Jul-15	15 meter	Ulva intestinalis	NF	NF	NF	NF	NF	NF	NF	NF	NF	NF	NF	NF	2 (3.0), 2 (0.1875)	4	NF	NF	NF	NF
Jul-15	16 meter	Padina minor	NF	NF	2 (3.0), 2 (0.1875)	4	NF	NF	NF	NF	NF	NF	NF	NF	NF	NF	NF	NF	NF	NF
Jul-15	16 meter	Sargassum oligocystum	NF	NF	NF	NF	NF	NF	NF	NF	NF	NF	NF	NF	NF	NF	5 (1.5)	6	NF	NF
Jul-15	17 meter	Ceratodictyon intricatum	NF	NF	NF	NF	NF	NF	NF	NF	5 (1.5)	5	NF	NF	NF	NF	NF	NF	NF	NF
Jul-15	17 meter	Sargassum paniculatum	NF	NF	NF	NF	NF	NF	NF	NF	NF	NF	NF	NF	NF	NF	3 (3.0), 3 (0.75)	6	NF	NF
Jul-15	17 meter	Sargassum oligocystum	NF	NF	NF	NF	NF	NF	NF	NF	NF	NF	NF	NF	NF	NF	7 (1.5)	7	NF	NF
Jul-15	18 meter	Sargassum paniculatum	NF	NF	NF	NF	NF	NF	NF	NF	NF	NF	NF	NF	NF	NF	NF	NF	7 (1.5)	7
Jul-15	18 meter	Sargassum tenerrimum	NF	NF	NF	NF	NF	NF	NF	NF	NF	NF	NF	NF	NF	NF	NF	NF	3 (4.5)	3
Jul-15	21 meter	Chaetomorpha spp.	NF	NF	NF	NF	NF	NF	NF	NF	NF	NF	2 (3.0), 3 (0.375)	5	NF	NF	NF	NF	NF	NF
Aug-15	2 meter	Chaetomorpha spp.	NF	NF	NF	NF	NF	NF	5 (1.5)	5	NF	NF	NF	NF	NF	NF	5 (1.5)	5	NF	NF
Aug-15	2 meter	Ulva intestinalis	NF	NF	NF	NF	NF	NF	2 (1.5), 1 (0.75)	3	NF	NF	NF	NF	NF	NF	NF	NF	NF	NF
Aug-15	3 meter	Chaetomorpha spp.	3 (3.0), 3 (0.1875)	6	NF	NF	NF	NF	NF	NF	NF	NF	NF	NF	NF	NF	NF	NF	NF	NF
Aug-15	3 meter	Galaxaura rugosa	NF	NF	NF	NF	1 (3.0), 5 (0.375)	6	NF	NF	NF	NF	1 (3.0), 3 (0.75)	5	NF	NF	NF	NF	NF	NF
Aug-15	3 meter	Sargassum oligocystum	NF	NF	NF	NF	NF	NF	NF	NF	NF	NF	NF	NF	NF	NF	NF	NF	5 (1.5)	5
Aug-15	4 meter	Chaetomorpha spp.	NF	NF	7 (1.5)	7	NF	NF	NF	NF	NF	NF	NF	NF	NF	NF	NF	NF	NF	NF
Aug-15	4 meter	Caulerpa racemosa	NF	NF	NF	NF	NF	NF	NF	NF	NF	NF	3 (3.0), 3 (0.75)	6	NF	NF	NF	NF	NF	NF
Aug-15	4 meter	Ulva intestinalis	NF	NF	NF	NF	NF	NF	NF	NF	NF	NF	NF	NF	NF	NF	1 (3.0), 3 (0.75)	5	NF	NF
Aug-15	5 meter	Sargassum oligocystum	NF	NF	NF	NF	NF	NF	2 (3.0), 1 (1.5)	3	NF	NF	NF	NF	NF	NF	NF	NF	NF	NF
Aug-15	5 meter	Sargassum microcystum	NF	NF	NF	NF	NF	NF	2 (1.5), 3 (0.75), 1 (0.375)	6	NF	NF	NF	NF	NF	NF	NF	NF	NF	NF
Aug-15	5 meter	Chaetomorpha spp.	NF	NF	NF	NF	NF	NF	NF	NF	7 (1.5)	7	NF	NF	3 (3.0), 3 (0.1875)	6	NF	NF	7 (1.5)	7
Aug-15	5 meter	Sargassum paniculatum	NF	NF	NF	NF	NF	NF	NF	NF	1 (3.0), 5 (0.375)	6	NF	NF	NF	NF	NF	NF	NF	NF
Aug-15	6 meter	Galaxaura rugosa	NF	NF	2 (1.5), 3 (0.75), 1 (0.375)	6	NF	NF	NF	NF	NF	NF	NF	NF	NF	NF	NF	NF	NF	NF
Aug-15	6 meter	Sargassum oligocystum	NF	NF	1 (3.0), 3 (1.5)	4	NF	NF	NF	NF	NF	NF	NF	NF	NF	NF	3 (3.0), 1 (0.375)	4	NF	NF
Aug-15	6 meter	Acanthophora muscoides	NF	NF	NF	NF	9 (0.75)	9	NF	NF	NF	NF	NF	NF	NF	NF	NF	NF	NF	NF
Aug-15	6 meter	Caulerpa racemosa	NF	NF	NF	NF	NF	NF	3 (1.5), 3 (0.75)	6	NF	NF	NF	NF	NF	NF	NF	NF	NF	NF
Aug-15	6 meter	Ulva intestinalis	NF	NF	NF	NF	NF	NF	NF	NF	NF	NF	2 (1.5), 1 (0.75)	3	NF	NF	NF	NF	NF	NF
Aug-15	7 meter	Ulva intestinalis	NF	NF	NF	NF	NF	NF	NF	NF	3 (1.5)	3	NF	NF	NF	NF	NF	NF	NF	NF
Aug-15	7 meter	Dictyota dichotoma	NF	NF	NF	NF	NF	NF	NF	NF	NF	NF	NF	NF	NF	NF	2 (0.75)	2	NF	NF
Aug-15	8 meter	Ulva intestinalis	NF	NF	1 (3.0), 3 (0.75)	5	NF	NF	NF	NF	NF	NF	NF	NF	NF	NF	NF	NF	NF	NF
Aug-15	8 meter	Sargassum oligocystum	NF	NF	NF	NF	2 (3.0), 3 (0.1875)	5	NF	NF	NF	NF	NF	NF	NF	NF	NF	NF	NF	NF
Aug-15	8 meter	Acanthophora muscoides	NF	NF	1 (3.0), 5 (0.375)	6	NF	NF	NF	NF	NF	NF	NF	NF	NF	NF	NF	NF	NF	NF
Aug-15	8 meter	Sargassum paniculatum	NF	NF	NF	NF	NF	NF	NF	NF	NF	NF	NF	NF	NF	NF	NF	NF	7 (1.5)	7
Aug-15	8 meter	Sargassum microcystum	NF	NF	NF	NF	NF	NF	NF	NF	NF	NF	NF	NF	NF	NF	NF	NF	2 (3.0), 2 (0.375)	4
Aug-15	9 meter	Polysiphonia coacta	NF	NF	NF	NF	NF	NF	NF	NF	NF	NF	1 (0.375)	1	NF	NF	NF	NF	NF	NF
Aug-15	9 meter	Sargassum paniculatum	NF	NF	NF	NF	NF	NF	NF	NF	NF	NF	NF	NF	NF	NF	NF	NF	3 (3.0), 3 (0.375)	6
Aug-15	9 meter	Sargassum microcystum	NF	NF	NF	NF	NF	NF	NF	NF	NF	NF	NF	NF	NF	NF	3 (1.5)	3	NF	NF
Aug-15	10 meter	Sargassum microcystum	1 (3.0), 5 (0.375)	6	NF	NF	NF	NF	NF	NF	NF	NF	NF	NF	NF	NF	NF	NF	NF	NF
Aug-15	10 meter	Ulva intestinalis	NF	NF	NF	NF	NF	NF	2 (3.0), 5 (0.375)	7	NF	NF	NF	NF	NF	NF	NF	NF	NF	NF
Aug-15	10 meter	Sargassum paniculatum	NF	NF	NF	NF	NF	NF	NF	NF	NF	NF	NF	NF	NF	NF	NF	NF	2 (3.0), 3 (0.75), 1 (0.375)	6
Aug-15	11 meter	Ulva intestinalis	NF	NF	NF	NF	3 (3.0), 5 (0.1875)	8	NF	NF	NF	NF	NF	NF	NF	NF	NF	NF	NF	NF
Aug-15	11 meter	Sargassum oligocystum	NF	NF	NF	NF	NF	NF	7 (1.5)	7	NF	NF	NF	NF	NF	NF	NF	NF	NF	NF
Aug-15	11 meter	Sargassum paniculatum	NF	NF	NF	NF	NF	NF	2 (3.0), 3 (0.75), 3 (0.375)	8	NF	NF	NF	NF	NF	NF	NF	NF	NF	NF
Aug-15	12 meter	Padina minor	NF	NF	1 (3.0), 1 (0.75)	2	NF	NF	NF	NF	NF	NF	NF	NF	3 (0.75), 1 (0.1875)	4	NF	NF	NF	NF
Aug-15	12 meter	Sargassum oligocystum	NF	NF	NF	NF	NF	NF	NF	NF	2 (3.0), 5 (0.375)	7	NF	NF	2 (3.0), 3 (0.75)	5	NF	NF	NF	NF
Aug-15	12 meter	Sargassum paniculatum	NF	NF	NF	NF	NF	NF	NF	NF	2 (3.0), 3 (0.1875)	5	NF	NF	NF	NF	NF	NF	NF	NF
Aug-15	12 meter	Sargassum tenerrimum	NF	NF	NF	NF	NF	NF	NF	NF	NF	NF	NF	NF	NF	NF	NF	NF	1 (3.0), 5 (0.375)	6
Aug-15	13 meter	Chaetomorpha spp.	NF	NF	NF	NF	NF	NF	NF	NF	NF	NF	2 (3.0), 3 (0.75)	5	NF	NF	NF	NF	NF	NF
Aug-15	13 meter	Ulva intestinalis	NF	NF	NF	NF	NF	NF	NF	NF	NF	NF	NF	NF	NF	NF	NF	NF	2 (3.0), 2 (0.375)	4
Aug-15	14 meter	Chaetomorpha spp.	2 (3.0), 3 (0.1875)	5	NF	NF	NF	NF	NF	NF	NF	NF	NF	NF	NF	NF	NF	NF	NF	NF
Aug-15	14 meter	Sargassum paniculatum	NF	NF	NF	NF	1 (3.0), 2 (0.375)	3	NF	NF	NF	NF	NF	NF	NF	NF	NF	NF	NF	NF
Aug-15	14 meter	Sargassum microcystum	NF	NF	NF	NF	NF	NF	NF	NF	NF	NF	NF	NF	NF	NF	5 (1.5)	5	NF	NF
Aug-15	14 meter	Sargassum tenerrimum	NF	NF	NF	NF	NF	NF	NF	NF	NF	NF	NF	NF	1 (3.0), 1 (0.375)	2	NF	NF	NF	NF
Aug-15	15 meter	Ulva intestinalis	NF	NF	NF	NF	NF	NF	NF	NF	NF	NF	NF	NF	2 (3.0), 3 (0.1875)	5	NF	NF	NF	NF
Aug-15	16 meter	Sargassum oligocystum	NF	NF	NF	NF	NF	NF	NF	NF	NF	NF	NF	NF	NF	NF	2 (3.0), 1 (0.1875)	3	NF	NF
Aug-15	17 meter	Sargassum paniculatum	NF	NF	NF	NF	NF	NF	NF	NF	NF	NF	NF	NF	NF	NF	4 (3.0), 5 (0.375)	3	NF	NF
Aug-15	17 meter	Sargassum oligocystum	NF	NF	NF	NF	NF	NF	NF	NF	NF	NF	NF	NF	NF	NF	4 (3.0), 4 (0.1875)	9	NF	NF
Aug-15	18 meter	Sargassum paniculatum	NF	NF	NF	NF	NF	NF	NF	NF	NF	NF	NF	NF	NF	NF	NF	NF	3 (3.0), 3 (0.375)	6
Aug-15	18 meter	Sargassum tenerrimum	NF	NF	NF	NF	NF	NF	NF	NF	NF	NF	NF	NF	NF	NF	NF	NF	3 (3.0), 3 (0.1875)	6
Aug-15	21 meter	Chaetomorpha spp.	NF	NF	NF	NF	NF	NF	NF	NF	NF	NF	3 (3.0), 3 (0.1875)	6	NF	NF	NF	NF	NF	NF
Sep-15	2 meter	Chaetomorpha spp.	NF	NF	NF	NF	NF	NF	2 (3.0), 3 (0.1875)	5	NF	NF	NF	NF	NF	NF	5 (1.5)	5	NF	NF
Sep-15	2 meter	Ulva intestinalis	NF	NF	NF	NF	NF	NF	5 (0.75)	5	NF	NF	NF	NF	NF	NF	NF	NF	NF	NF
Sep-15	3 meter	Galaxaura rugosa	NF	NF	NF	NF	1 (3.0), 1 (0.375)	2	NF	NF	NF	NF	1 (3.0), 1 (0.1875)	2	NF	NF	NF	NF	NF	NF
Sep-15	3 meter	Chaetomorpha spp.	2 (3.0), 3 (0.75), 1 (0.375)	6	NF	NF	NF	NF	NF	NF	NF	NF	NF	NF	NF	NF	NF	NF	NF	NF
Sep-15	3 meter	Acanthophora spicifera	NF	NF	NF	NF	3 (1.5)	3	NF	NF	NF	NF	NF	NF	NF	NF	NF	NF	NF	NF
Sep-15	3 meter	Sargassum oligocystum	NF	NF	NF	NF	NF	NF	NF	NF	NF	NF	NF	NF	NF	NF	NF	NF	2 (3.0), 2 (0.375)	4
Sep-15	4 meter	Caulerpa racemosa	NF	NF	NF	NF	NF	NF	NF	NF	NF	NF	2 (1.5), 3 (0.75), 1 (0.375)	6	NF	NF	NF	NF	NF	NF
Sep-15	4 meter	Chaetomorpha spp.	NF	NF	3 (3.0), 2 (0.75)	5	NF	NF	NF	NF	NF	NF	NF	NF	NF	NF	NF	NF	NF	NF
Sep-15	4 meter	Ulva intestinalis	NF	NF	NF	NF	NF	NF	NF	NF	NF	NF	NF	NF	NF	NF	1 (3.0), 2 (0.375)	3	NF	NF
Sep-15	5 meter	Sargassum oligocystum	NF	NF	NF	NF	NF	NF	1 (3.0), 5 (0.75), 3 (0.375)	9	NF	NF	NF	NF	NF	NF	NF	NF	NF	NF
Sep-15	5 meter	Sargassum microcystum	NF	NF	NF	NF	NF	NF	3 (1.5)	3	NF	NF	NF	NF	NF	NF	NF	NF	NF	NF
Sep-15	5 meter	Chaetomorpha spp.	NF	NF	NF	NF	NF	NF	NF	NF	7 (1.5)	7	NF	NF	2 (3.0), 2 (1.5), 2 (0.1875)	6	NF	NF	3 (3.0), 3 (0.75)	6
Sep-15	5 meter	Sargassum paniculatum	NF	NF	NF	NF	NF	NF	NF	NF	2 (1.5), 3 (0.75), 1 (0.375)	6	NF	NF	NF	NF	NF	NF	NF	NF
Sep-15	5 meter	Jania adhaerens	NF	NF	NF	NF	NF	NF	NF	NF	3 (1.5)	3	NF	NF	NF	NF	NF	NF	NF	NF
Sep-15	6 meter	Ulva intestinalis	NF	NF	NF	NF	NF	NF	NF	NF	NF	NF	2 (1.5), 1 (0.375)	3	NF	NF	NF	NF	NF	NF
Sep-15	6 meter	Jania adhaerens	NF	NF	NF	NF	NF	NF	NF	NF	NF	NF	3 (0.75)	3	NF	NF	NF	NF	NF	NF
Sep-15	6 meter	Acanthophora spicifera	1 (3.0), 5 (0.375)	6	NF	NF	NF	NF	NF	NF	NF	NF	NF	NF	NF	NF	NF	NF	NF	NF
Sep-15	6 meter	Galaxaura rugosa	NF	NF	1 (3.0), 1 (0.375)	2	NF	NF	NF	NF	NF	NF	NF	NF	NF	NF	NF	NF	NF	NF
Sep-15	6 meter	Sargassum oligocystum	NF	NF	2 (1.5), 3 (0.75), 1 (0.375)	6	NF	NF	NF	NF	NF	NF	NF	NF	NF	NF	3 (3.0), 1 (0.1875)	4	NF	NF
Sep-15	6 meter	Acanthophora muscoides	NF	NF	NF	NF	2 (1.5), 3 (0.75), 1 (0.375)	6	NF	NF	NF	NF	NF	NF	NF	NF	NF	NF	NF	NF
Sep-15	8 meter	Padina minor	NF	NF	NF	NF	NF	NF	NF	NF	1 (0.375)	2	NF	NF	NF	NF	NF	NF	NF	NF
Sep-15	8 meter	Ulva intestinalis	NF	NF	1 (3.0), 5 (0.375)	6	NF	NF	NF	NF	NF	NF	NF	NF	NF	NF	NF	NF	NF	NF
Sep-15	8 meter	Acanthophora muscoides	NF	NF	1 (3.0), 3 (0.75)	4	NF	NF	NF	NF	NF	NF	NF	NF	NF	NF	NF	NF	NF	NF
Sep-15	8 meter	Sargassum oligocystum	NF	NF	NF	NF	5 (1.5)	5	NF	NF	NF	NF	NF	NF	NF	NF	NF	NF	NF	NF
Sep-15	8 meter	Acanthophora spicifera	NF	NF	NF	NF	1 (3.0), 1 (0.75)	2	NF	NF	NF	NF	NF	NF	NF	NF	NF	NF	NF	NF
Sep-15	8 meter	Sargassum paniculatum	NF	NF	NF	NF	NF	NF	NF	NF	NF	NF	NF	NF	NF	NF	NF	NF	3 (3.0), 1 (0.375)	4
Sep-15	8 meter	Sargassum microcystum	NF	NF	NF	NF	NF	NF	NF	NF	NF	NF	NF	NF	NF	NF	NF	NF	2 (3.0), 3 (0.75)	5
Sep-15	9 meter	Sargassum paniculatum	NF	NF	NF	NF	NF	NF	NF	NF	NF	NF	NF	NF	NF	NF	3 (0.375)	3	7 (1.5)	7
Sep-15	9 meter	Sargassum microcystum	NF	NF	NF	NF	NF	NF	NF	NF	NF	NF	NF	NF	NF	NF	1 (3.0), 5 (0.375)	6	NF	NF
Sep-15	10 meter	Ulva intestinalis	NF	NF	NF	NF	NF	NF	3 (1.5), 3 (0.375), 3 (0.1875)	9	NF	NF	NF	NF	NF	NF	NF	NF	NF	NF
Sep-15	10 meter	Cladophora vagabunda	NF	NF	NF	NF	NF	NF	NF	NF	NF	NF	1 (0.375)	1	NF	NF	NF	NF	NF	NF
Sep-15	10 meter	Sargassum microcystum	3 (1.5)	3	NF	NF	NF	NF	NF	NF	NF	NF	NF	NF	NF	NF	NF	NF	NF	NF
Sep-15	10 meter	Sargassum paniculatum	NF	NF	NF	NF	NF	NF	NF	NF	NF	NF	NF	NF	NF	NF	NF	NF	2 (3.0), 3 (0.75), 1 (0.375)	6
Sep-15	11 meter	Sargassum oligocystum	NF	NF	NF	NF	NF	NF	3 (3.0), 3 (0.75)	6	NF	NF	NF	NF	NF	NF	NF	NF	NF	NF
Sep-15	11 meter	Sargassum paniculatum	NF	NF	NF	NF	NF	NF	1 (3.0), 5 (0.75), 3 (0.375)	9	NF	NF	NF	NF	NF	NF	NF	NF	NF	NF
Sep-15	11 meter	Ulva intestinalis	NF	NF	NF	NF	2 (3.0), 4 (0.375)	6	NF	NF	NF	NF	NF	NF	NF	NF	NF	NF	NF	NF
Sep-15	12 meter	Sargassum oligocystum	NF	NF	NF	NF	NF	NF	NF	NF	5 (1.5)	5	NF	NF	5 (1.5)	5	NF	NF	NF	NF
Sep-15	12 meter	Sargassum paniculatum	NF	NF	NF	NF	NF	NF	NF	NF	1 (3.0), 7 (0.375), 1 (0.1875)	9	NF	NF	NF	NF	NF	NF	NF	NF
Sep-15	12 meter	Acanthophora spicifera	NF	NF	2 (1.5), 1 (0.375)	3	NF	NF	NF	NF	NF	NF	NF	NF	NF	NF	NF	NF	NF	NF
Sep-15	12 meter	Sargassum tenerrimum	NF	NF	NF	NF	NF	NF	NF	NF	NF	NF	NF	NF	NF	NF	NF	NF	3 (1.5), 1 (0.75)	4
Sep-15	13 meter	Chaetomorpha spp.	NF	NF	NF	NF	NF	NF	NF	NF	NF	NF	5 (1.5)	5	NF	NF	NF	NF	NF	NF
Sep-15	13 meter	Ulva intestinalis	NF	NF	NF	NF	NF	NF	NF	NF	NF	NF	NF	NF	NF	NF	NF	NF	2 (3.0), 3 (0.1875)	5
Sep-15	14 meter	Jania adhaerens	NF	NF	NF	NF	NF	NF	NF	NF	2 (1.5), 3 (0.75), 1 (0.375)	6	NF	NF	NF	NF	NF	NF	NF	NF
Sep-15	14 meter	Chaetomorpha spp.	1 (3.0), 3 (1.5)	4	NF	NF	NF	NF	NF	NF	NF	NF	NF	NF	NF	NF	NF	NF	NF	NF
Sep-15	14 meter	Sargassum microcystum	NF	NF	NF	NF	NF	NF	NF	NF	NF	NF	NF	NF	NF	NF	1 (3.0), 5 (0.75), 3 (0.375)	9	NF	NF
Sep-15	14 meter	Sargassum tenerrimum	NF	NF	NF	NF	NF	NF	NF	NF	NF	NF	NF	NF	1 (3.0), 5 (0.375)	6	NF	NF	NF	NF
Sep-15	15 meter	Ulva intestinalis	NF	NF	NF	NF	NF	NF	NF	NF	NF	NF	NF	NF	7 (0.75), 3 (0.1875)	10	NF	NF	NF	NF
Sep-15	17 meter	Sargassum paniculatum	NF	NF	NF	NF	NF	NF	NF	NF	NF	NF	NF	NF	NF	NF	4 (3.0), 2 (0.1875)	6	NF	NF
Sep-15	17 meter	Sargassum oligocystum	NF	NF	NF	NF	NF	NF	NF	NF	NF	NF	NF	NF	NF	NF	3 (3.0), 3 (0.75)	6	NF	NF
Sep-15	18 meter	Sargassum paniculatum	NF	NF	NF	NF	NF	NF	NF	NF	NF	NF	NF	NF	NF	NF	NF	NF	7 (1.5)	7
Sep-15	18 meter	Sargassum tenerrimum	NF	NF	NF	NF	NF	NF	NF	NF	NF	NF	NF	NF	NF	NF	NF	NF	2 (3.0), 3 (0.75)	5
Sep-15	21 meter	Chaetomorpha spp.	NF	NF	NF	NF	NF	NF	NF	NF	NF	NF	2 (3.0), 3 (0.75), 1 (0.375)	6	NF	NF	NF	NF	NF	NF
Oct-15	2 meter	Chaetomorpha spp.	NF	NF	NF	NF	NF	NF	NF	NF	NF	NF	NF	NF	NF	NF	2 (3.0), 3 (0.75)	5	NF	NF
Oct-15	3 meter	Chaetomorpha spp.	2 (3.0), 3 (0.75)	5	NF	NF	3 (1.5)	3	5 (1.5)	5	NF	NF	NF	NF	NF	NF	NF	NF	NF	NF
Oct-15	3 meter	Acanthophora spicifera	1 (3.0), 3 (0.75), 1 (0.375)	4	NF	NF	NF	NF	NF	NF	NF	NF	NF	NF	NF	NF	NF	NF	NF	NF
Oct-15	4 meter	Chaetomorpha spp.	NF	NF	3 (3.0), 2 (0.375)	5	NF	NF	NF	NF	NF	NF	NF	NF	NF	NF	NF	NF	NF	NF
Oct-15	4 meter	Ulva intestinalis	NF	NF	NF	NF	NF	NF	NF	NF	NF	NF	NF	NF	NF	NF	1 (3.0), 2 (0.375)	3	NF	NF
Oct-15	5 meter	Sargassum oligocystum	NF	NF	NF	NF	NF	NF	2 (3.0), 5 (0.375)	7	NF	NF	NF	NF	NF	NF	NF	NF	NF	NF
Oct-15	5 meter	Sargassum microcystum	NF	NF	NF	NF	NF	NF	1 (3.0), 3 (0.375)	4	NF	NF	NF	NF	NF	NF	NF	NF	NF	NF
Oct-15	5 meter	Chaetomorpha spp.	NF	NF	NF	NF	NF	NF	NF	NF	2 (3.0), 3 (0.75)	5	NF	NF	3 (3.0), 2 (0.375)	5	NF	NF	7 (1.5)	7
Oct-15	5 meter	Sargassum paniculatum	NF	NF	NF	NF	NF	NF	NF	NF	2 (3.0), 3 (0.75)	5	NF	NF	NF	NF	NF	NF	NF	NF
Oct-15	5 meter	Jania adhaerens	NF	NF	NF	NF	NF	NF	NF	NF	3 (1.5)	3	NF	NF	NF	NF	NF	NF	NF	NF
Oct-15	6 meter	Acanthophora spicifera	3 (1.5), 1 (0.75)	4	NF	NF	NF	NF	NF	NF	NF	NF	NF	NF	NF	NF	NF	NF	NF	NF
Oct-15	6 meter	Sargassum oligocystum	NF	NF	5 (1.5)	5	NF	NF	NF	NF	NF	NF	NF	NF	NF	NF	3 (3.0), 1 (0.375)	4	NF	NF
Oct-15	6 meter	Jania adhaerens	NF	NF	NF	NF	NF	NF	NF	NF	NF	NF	1 (3.0), 1 (0.375)	2	NF	NF	NF	NF	NF	NF
Oct-15	7 meter	Jania adhaerens	NF	NF	NF	NF	NF	NF	1 (3.0), 2 (0.375)	4	NF	NF	NF	NF	NF	NF	NF	NF	NF	NF
Oct-15	8 meter	Ulva intestinalis	NF	NF	5 (1.5)	5	NF	NF	NF	NF	NF	NF	NF	NF	NF	NF	NF	NF	NF	NF
Oct-15	8 meter	Sargassum oligocystum	NF	NF	NF	NF	5 (1.5), 3 (0.75)	8	NF	NF	NF	NF	NF	NF	NF	NF	NF	NF	NF	NF
Oct-15	8 meter	Acanthophora spicifera	NF	NF	NF	NF	2 (3.0), 5 (0.1875)	7	NF	NF	NF	NF	NF	NF	NF	NF	NF	NF	NF	NF
Oct-15	8 meter	Sargassum microcystum	NF	NF	NF	NF	NF	NF	NF	NF	NF	NF	NF	NF	NF	NF	1 (3.0), 1 (0.75)	2	2 (3.0), 3 (0.75)	5
Oct-15	8 meter	Sargassum paniculatum	NF	NF	NF	NF	NF	NF	NF	NF	NF	NF	NF	NF	NF	NF	NF	NF	5 (1.5)	5
Oct-15	9 meter	Sargassum microcystum	NF	NF	NF	NF	NF	NF	NF	NF	NF	NF	3 (1.5)	3	NF	NF	3 (1.5), 1 (0.75)	4	NF	NF
Oct-15	9 meter	Sargassum tenerrimum	NF	NF	NF	NF	NF	NF	NF	NF	NF	NF	1 (3.0), 1 (0.375)	2	NF	NF	NF	NF	NF	NF
Oct-15	9 meter	Sargassum oligocystum	NF	NF	NF	NF	NF	NF	NF	NF	NF	NF	1 (3.0), 3 (0.75), 1 (0.375)	4	NF	NF	NF	NF	NF	NF
Oct-15	9 meter	Sargassum paniculatum	NF	NF	NF	NF	NF	NF	NF	NF	NF	NF	NF	NF	NF	NF	1 (3.0), 1 (0.75)	2	3 (3.0), 1 (0.75)	4
Oct-15	10 meter	Sargassum microcystum	1 (3.0), 2 (0.375)	3	NF	NF	NF	NF	NF	NF	NF	NF	NF	NF	NF	NF	NF	NF	NF	NF
Oct-15	10 meter	Sargassum paniculatum	NF	NF	NF	NF	NF	NF	NF	NF	NF	NF	NF	NF	NF	NF	NF	NF	2 (3.0), 3 (0.75)	5
Oct-15	11 meter	Sargassum oligocystum	NF	NF	NF	NF	NF	NF	7 (1.5)	7	NF	NF	NF	NF	NF	NF	NF	NF	NF	NF
Oct-15	11 meter	Sargassum paniculatum	NF	NF	NF	NF	NF	NF	3 (3.0), 1 (0.75)	4	NF	NF	NF	NF	NF	NF	NF	NF	NF	NF
Oct-15	12 meter	Acanthophora spicifera	NF	NF	3 (0.75)	3	NF	NF	NF	NF	NF	NF	NF	NF	NF	NF	NF	NF	NF	NF
Oct-15	12 meter	Sargassum oligocystum	NF	NF	NF	NF	NF	NF	NF	NF	2 (3.0), 5 (0.375)	7	NF	NF	3 (1.5), 1 (0.75)	4	NF	NF	NF	NF
Oct-15	12 meter	Sargassum tenerrimum	NF	NF	NF	NF	NF	NF	NF	NF	NF	NF	NF	NF	NF	NF	NF	NF	2 (3.0), 5 (0.375)	7
Oct-15	12 meter	Sargassum paniculatum	NF	NF	NF	NF	NF	NF	NF	NF	5 (1.5)	5	NF	NF	NF	NF	NF	NF	NF	NF
Oct-15	13 meter	Chaetomorpha spp.	NF	NF	NF	NF	3 (0.75), 2 (0.1875)	5	NF	NF	NF	NF	2 (3.0), 3 (0.375)	5	NF	NF	NF	NF	NF	NF
Oct-15	13 meter	Ulva intestinalis	NF	NF	NF	NF	NF	NF	NF	NF	NF	NF	NF	NF	NF	NF	NF	NF	5 (1.5)	5
Oct-15	14 meter	Chaetomorpha spp.	2 (1.5), 2 (0.1875)	4	NF	NF	NF	NF	NF	NF	NF	NF	NF	NF	NF	NF	NF	NF	NF	NF
Oct-15	14 meter	Jania adhaerens	NF	NF	NF	NF	NF	NF	NF	NF	2 (3.0), 1 (0.1875)	3	NF	NF	NF	NF	NF	NF	NF	NF
Oct-15	14 meter	Sargassum microcystum	NF	NF	NF	NF	NF	NF	NF	NF	NF	NF	NF	NF	NF	NF	NF	NF	NF	NF
Oct-15	14 meter	Sargassum tenerrimum	NF	NF	NF	NF	NF	NF	NF	NF	NF	NF	NF	NF	3 (1.5), 5 (0.1875)	8	NF	NF	NF	NF
Oct-15	17 meter	Sargassum paniculatum	NF	NF	NF	NF	NF	NF	NF	NF	NF	NF	NF	NF	NF	NF	2 (3.0), 3 (0.75)	5	NF	NF
Oct-15	17 meter	Sargassum oligocystum	NF	NF	NF	NF	NF	NF	NF	NF	NF	NF	NF	NF	NF	NF	4 (3.0), 4 (0.1875)	8	NF	NF
Oct-15	18 meter	Sargassum paniculatum	NF	NF	NF	NF	NF	NF	NF	NF	NF	NF	NF	NF	NF	NF	NF	NF	6 (1.5), 1 (0.75)	7
Oct-15	18 meter	Sargassum tenerrimum	NF	NF	NF	NF	NF	NF	NF	NF	NF	NF	NF	NF	NF	NF	NF	NF	2 (3.0), 3 (0.75)	5
Oct-15	21 meter	Chaetomorpha spp.	NF	NF	NF	NF	NF	NF	NF	NF	NF	NF	3 (3.0), 1 (0.1875)	5	NF	NF	NF	NF	NF	NF
Nov-15	2 meter	Chaetomorpha spp.	NF	NF	NF	NF	NF	NF	2 (3.0), 3 (0.75)	5	NF	NF	NF	NF	NF	NF	3 (3.0), 1 (0.75)	4	NF	NF
Nov-15	3 meter	Chaetomorpha spp.	5 (1.5)	5	NF	NF	2 (3.0), 1 (0.1875)	3	NF	NF	NF	NF	NF	NF	NF	NF	NF	NF	NF	NF
Nov-15	3 meter	Acanthophora spicifera	NF	NF	NF	NF	3 (1.5)	3	NF	NF	NF	NF	NF	NF	NF	NF	NF	NF	NF	NF
Nov-15	4 meter	Chaetomorpha spp.	NF	NF	2 (3.0), 5 (0.375)	7	NF	NF	NF	NF	NF	NF	NF	NF	NF	NF	NF	NF	NF	NF
Nov-15	4 meter	Ulva clathrata	NF	NF	3 (0.75)	3	NF	NF	NF	NF	NF	NF	NF	NF	NF	NF	3 (0.375)	3	NF	NF
Nov-15	4 meter	Ulva intestinalis	NF	NF	NF	NF	NF	NF	NF	NF	NF	NF	NF	NF	NF	NF	1 (3.0), 3 (0.1875)	4	NF	NF
Nov-15	5 meter	Sargassum oligocystum	NF	NF	NF	NF	NF	NF	1 (3.0), 3 (0.75)	4	NF	NF	NF	NF	NF	NF	NF	NF	NF	NF
Nov-15	5 meter	Sargassum microcystum	NF	NF	NF	NF	NF	NF	1 (3.0), 1 (0.375)	3	NF	NF	NF	NF	NF	NF	NF	NF	NF	NF
Nov-15	5 meter	Chaetomorpha spp.	NF	NF	NF	NF	NF	NF	NF	NF	3 (3.0), 1 (0.75)	4	NF	NF	2 (3.0), 5 (0.375)	7	NF	NF	6 (1.5), 3 (0.1875)	9
Nov-15	5 meter	Ulva clathrata	NF	NF	NF	NF	NF	NF	NF	NF	NF	NF	NF	NF	NF	NF	NF	NF	2 (1.5), 2 (0.1875)	4
Nov-15	6 meter	Acanthophora spicifera	1 (3.0), 3 (0.375)	4	NF	NF	NF	NF	NF	NF	NF	NF	NF	NF	NF	NF	NF	NF	NF	NF
Nov-15	6 meter	Hypnea spinella	3 (0.75)	3	NF	NF	NF	NF	NF	NF	NF	NF	NF	NF	NF	NF	NF	NF	NF	NF
Nov-15	6 meter	Sargassum oligocystum	NF	NF	2 (3.0), 3 (0.75)	5	NF	NF	NF	NF	NF	NF	NF	NF	NF	NF	7 (1.5)	7	NF	NF
Nov-15	7 meter	Hypnea cervicornis	NF	NF	NF	NF	2 (1.5), 1 (0.375)	3	NF	NF	NF	NF	NF	NF	NF	NF	NF	NF	NF	NF
Nov-15	7 meter	Hypnea spinella	NF	NF	NF	NF	NF	NF	NF	NF	NF	NF	3 (0.375)	3	NF	NF	NF	NF	NF	NF
Nov-15	8 meter	Ulva intestinalis	NF	NF	2 (3.0), 2 (0.1875)	4	NF	NF	NF	NF	NF	NF	NF	NF	NF	NF	NF	NF	NF	NF
Nov-15	8 meter	Sargassum oligocystum	NF	NF	NF	NF	2 (3.0), 3 (0.75)	5	NF	NF	NF	NF	NF	NF	NF	NF	NF	NF	NF	NF
Nov-15	8 meter	Acanthophora spicifera	NF	NF	NF	NF	2 (1.5), 1 (0.75)	3	NF	NF	NF	NF	NF	NF	NF	NF	NF	NF	NF	NF
Nov-15	8 meter	Sargassum microcystum	NF	NF	NF	NF	NF	NF	NF	NF	NF	NF	NF	NF	NF	NF	3 (1.5)	3	2 (3.0), 3 (0.75)	5
Nov-15	8 meter	Sargassum paniculatum	NF	NF	NF	NF	NF	NF	NF	NF	NF	NF	NF	NF	NF	NF	NF	NF	7 (1.5)	7
Nov-15	9 meter	Hypnea spinella	NF	NF	NF	NF	NF	NF	1 (3.0), 1 (0.375)	2	NF	NF	NF	NF	NF	NF	NF	NF	NF	NF
Nov-15	9 meter	Canistrocarpus cervicornis	NF	NF	NF	NF	NF	NF	3 (0.75)	3	NF	NF	NF	NF	NF	NF	NF	NF	NF	NF
Nov-15	9 meter	Sargassum microcystum	NF	NF	NF	NF	NF	NF	NF	NF	NF	NF	1 (3.0), 3 (0.375)	4	NF	NF	3 (1.5)	3	NF	NF
Nov-15	9 meter	Sargassum oligocystum	NF	NF	NF	NF	NF	NF	NF	NF	NF	NF	1 (3.0),1 (0.75)	2	NF	NF	NF	NF	NF	NF
Nov-15	9 meter	Sargassum paniculatum	NF	NF	NF	NF	NF	NF	NF	NF	NF	NF	NF	NF	NF	NF	1 (3.0), 3 (0.1875)	4	2 (3.0), 2 (0.1875)	4
Nov-15	10 meter	Sargassum paniculatum	NF	NF	NF	NF	NF	NF	NF	NF	NF	NF	NF	NF	NF	NF	NF	NF	2 (3.0), 3 (0.75)	5
Nov-15	11 meter	Hypnea spinella	NF	NF	2 (0.75), 3 (0.375)	5	NF	NF	NF	NF	NF	NF	NF	NF	NF	NF	NF	NF	NF	NF
Nov-15	11 meter	Sargassum oligocystum	NF	NF	NF	NF	NF	NF	2 (3.0), 3 (0.75)	6	NF	NF	NF	NF	NF	NF	NF	NF	NF	NF
Nov-15	11 meter	Sargassum paniculatum	NF	NF	NF	NF	NF	NF	1 (3.0), 3 (0.75)	4	NF	NF	NF	NF	NF	NF	NF	NF	NF	NF
Nov-15	12 meter	Sargassum oligocystum	NF	NF	NF	NF	NF	NF	NF	NF	2 (3.0), 1 (0.1875)	3	NF	NF	1 (3.0), 3 (0.75), 1 (0.375)	5	NF	NF	NF	NF
Nov-15	12 meter	Sargassum paniculatum	NF	NF	NF	NF	NF	NF	NF	NF	1 (3.0), 3 (0.75)	4	NF	NF	NF	NF	NF	NF	NF	NF
Nov-15	12 meter	Sargassum tenerrimum	NF	NF	NF	NF	NF	NF	NF	NF	NF	NF	NF	NF	NF	NF	NF	NF	5 (1.5)	5
Nov-15	13 meter	Chaetomorpha spp.	NF	NF	NF	NF	2 (1.5), 1 (0.75)	3	NF	NF	NF	NF	4 (1.5), 2 (0.375)	6	NF	NF	NF	NF	NF	NF
Nov-15	13 meter	Hypnea spinella	NF	NF	NF	NF	NF	NF	NF	NF	NF	NF	1 (3.0), 1 (0.375)	2	NF	NF	NF	NF	NF	NF
Nov-15	13 meter	Ulva intestinalis	NF	NF	NF	NF	NF	NF	NF	NF	NF	NF	NF	NF	NF	NF	NF	NF	5 (1.5)	5
Nov-15	14 meter	Chaetomorpha spp.	3 (1.5)	3	NF	NF	NF	NF	NF	NF	NF	NF	NF	NF	NF	NF	NF	NF	NF	NF
Nov-15	14 meter	Sargassum microcystum	NF	NF	NF	NF	NF	NF	NF	NF	NF	NF	NF	NF	NF	NF	5 (1.5)	5	NF	NF
Nov-15	14 meter	Sargassum tenerrimum	NF	NF	NF	NF	NF	NF	NF	NF	NF	NF	NF	NF	3 (1.5)	3	NF	NF	NF	NF
Nov-15	17 meter	Sargassum paniculatum	NF	NF	NF	NF	NF	NF	NF	NF	NF	NF	NF	NF	NF	NF	3 (3.0), 1 (0.75)	4	NF	NF
Nov-15	17 meter	Sargassum oligocystum	NF	NF	NF	NF	NF	NF	NF	NF	NF	NF	NF	NF	NF	NF	1 (3.0), 3 (0.75), 1 (0.375)	5	NF	NF
Nov-15	18 meter	Sargassum paniculatum	NF	NF	NF	NF	NF	NF	NF	NF	NF	NF	NF	NF	NF	NF	NF	NF	2 (3.0), 7 (0.375)	9
Nov-15	18 meter	Sargassum tenerrimum	NF	NF	NF	NF	NF	NF	NF	NF	NF	NF	NF	NF	NF	NF	NF	NF	1 (3.0), 3 (0.375)	4
Nov-15	21 meter	Chaetomorpha spp.	NF	NF	NF	NF	NF	NF	NF	NF	NF	NF	3 (3.0), 3 (0.1875)	6	NF	NF	NF	NF	NF	NF
